# Supplementary material for: Genome-Wide Small RNA Sequencing and Gene Expression Analysis Reveals a microRNA Profile of Cancer Susceptibility in ATM-Deficient Human Mammary Epithelial Cells
Source: PubMed Central journal article supplement (PMC3669333; doi:10.1371/journal.pone.0064779), 2013-05-31
Supplement: pone.0064779.s001.pdf [file pone.0064779.s001.pdf]

| <b>miRNA ID</b>  | <b>WT1-TpM</b> | <b>WT2- TpM</b> | <b>WT3- TpM</b> | <b>ATM1- TpM</b> | <b>ATM2- TpM</b> | <b>ATM3- TpM</b> |
|------------------|----------------|-----------------|-----------------|------------------|------------------|------------------|
| hsa-let-7a-1     | 21315          | 20001           | 20740           | 26721            | 27131            | 25236            |
| hsa-let-7a-2     | 21109          | 19815           | 20514           | 26499            | 26938            | 24799            |
| hsa-let-7a-3     | 21371          | 20045           | 20774           | 26817            | 27194            | 25335            |
| hsa-let-7b       | 21264          | 19975           | 20654           | 26757            | 27102            | 24962            |
| hsa-let-7c       | 21011          | 19761           | 20450           | 26440            | 26902            | 24473            |
| hsa-let-7d       | 1079           | 1125            | 1009            | 968              | 1121             | 620              |
| hsa-let-7e       | 1260           | 1108            | 774             | 1219             | 1552             | 641              |
| hsa-let-7f-1     | 20941          | 20208           | 18522           | 22124            | 29249            | 16706            |
| hsa-let-7f-2     | 20903          | 20183           | 18486           | 22093            | 29241            | 16649            |
| hsa-let-7g       | 5775           | 6073            | 5625            | 4827             | 5460             | 3276             |
| hsa-let-7i       | 5730           | 6061            | 5584            | 4832             | 5468             | 3188             |
| hsa-mir-1-1      | 0              | 0               | 0               | 0                | 0                | 0                |
| hsa-mir-1-2      | 0              | 0               | 0               | 1                | 0                | 0                |
| hsa-mir-100      | 4103           | 3753            | 3364            | 4165             | 2613             | 5374             |
| hsa-mir-101-1    | 5597           | 5718            | 5707            | 12808            | 12117            | 14022            |
| hsa-mir-101-2    | 5595           | 5716            | 5705            | 12807            | 12116            | 14022            |
| hsa-mir-103-1    | 9863           | 8154            | 7631            | 14930            | 14362            | 16131            |
| hsa-mir-103-1-as | 9863           | 8154            | 7631            | 14930            | 14362            | 16131            |
| hsa-mir-103-2    | 9899           | 8193            | 7643            | 14952            | 14385            | 16147            |
| hsa-mir-103-2-as | 9878           | 8170            | 7638            | 14944            | 14376            | 16141            |
| hsa-mir-105-1    | 0              | 0               | 0               | 0                | 0                | 0                |
| hsa-mir-105-2    | 0              | 0               | 0               | 0                | 0                | 0                |
| hsa-mir-106a     | 19             | 19              | 19              | 50               | 44               | 57               |
| hsa-mir-106b     | 3827           | 3089            | 2445            | 3195             | 2240             | 4787             |
| hsa-mir-107      | 9857           | 8157            | 7624            | 14928            | 14363            | 16078            |
| hsa-mir-10a      | 129            | 122             | 132             | 136              | 85               | 164              |
| hsa-mir-10b      | 58             | 57              | 62              | 124              | 121              | 102              |
| hsa-mir-1178     | 0              | 0               | 0               | 0                | 0                | 0                |
| hsa-mir-1179     | 0              | 0               | 0               | 0                | 0                | 0                |
| hsa-mir-1180     | 3              | 6               | 6               | 7                | 8                | 10               |
| hsa-mir-1181     | 0              | 0               | 0               | 0                | 0                | 0                |
| hsa-mir-1182     | 0              | 0               | 0               | 0                | 0                | 0                |
| hsa-mir-1183     | 0              | 0               | 0               | 0                | 0                | 0                |
| hsa-mir-1184-1   | 0              | 0               | 0               | 0                | 0                | 0                |
| hsa-mir-1184-2   | 0              | 0               | 0               | 0                | 0                | 0                |
| hsa-mir-1184-3   | 0              | 0               | 0               | 0                | 0                | 0                |
| hsa-mir-1185-1   | 1              | 0               | 0               | 0                | 0                | 0                |
| hsa-mir-1185-2   | 1              | 0               | 0               | 0                | 0                | 0                |
| hsa-mir-1193     | 0              | 0               | 0               | 0                | 0                | 0                |
| hsa-mir-1197     | 0              | 0               | 0               | 0                | 0                | 0                |
| hsa-mir-1200     | 0              | 0               | 0               | 0                | 0                | 0                |
| hsa-mir-1201     | 31             | 38              | 37              | 57               | 47               | 75               |
| hsa-mir-1202     | 0              | 0               | 0               | 0                | 0                | 0                |
| hsa-mir-1203     | 0              | 0               | 0               | 0                | 0                | 0                |
| hsa-mir-1204     | 0              | 0               | 0               | 0                | 0                | 0                |
| hsa-mir-1205     | 0              | 0               | 0               | 0                | 0                | 0                |
| hsa-mir-1206     | 0              | 0               | 0               | 0                | 0                | 0                |
| hsa-mir-1207     | 0              | 0               | 0               | 0                | 0                | 0                |
| hsa-mir-1208     | 0              | 0               | 0               | 0                | 0                | 0                |
| hsa-mir-122      | 0              | 0               | 0               | 0                | 0                | 0                |
| hsa-mir-1224     | 0              | 0               | 0               | 0                | 0                | 0                |
| hsa-mir-1225     | 0              | 0               | 0               | 0                | 0                | 0                |

|                 |     |     |     |     |     |     |
|-----------------|-----|-----|-----|-----|-----|-----|
| hsa-mir-1226    | 2   | 3   | 2   | 3   | 2   | 2   |
| hsa-mir-1227    | 0   | 1   | 1   | 1   | 1   | 0   |
| hsa-mir-1228    | 0   | 0   | 0   | 0   | 1   | 0   |
| hsa-mir-1229    | 0   | 0   | 0   | 0   | 1   | 0   |
| hsa-mir-1231    | 0   | 0   | 0   | 0   | 0   | 0   |
| hsa-mir-1233-1  | 0   | 0   | 0   | 0   | 0   | 0   |
| hsa-mir-1233-2  | 0   | 0   | 0   | 0   | 0   | 0   |
| hsa-mir-1234    | 0   | 0   | 0   | 0   | 0   | 0   |
| hsa-mir-1236    | 0   | 0   | 0   | 0   | 0   | 0   |
| hsa-mir-1237    | 0   | 1   | 0   | 1   | 1   | 1   |
| hsa-mir-1238    | 0   | 0   | 0   | 0   | 0   | 0   |
| hsa-mir-124-1   | 1   | 0   | 0   | 0   | 0   | 0   |
| hsa-mir-124-2   | 1   | 0   | 0   | 0   | 0   | 0   |
| hsa-mir-124-3   | 1   | 0   | 0   | 0   | 0   | 0   |
| hsa-mir-1243    | 0   | 0   | 0   | 0   | 0   | 0   |
| hsa-mir-1244-1  | 0   | 0   | 0   | 1   | 1   | 0   |
| hsa-mir-1244-2  | 0   | 0   | 0   | 1   | 1   | 0   |
| hsa-mir-1244-3  | 0   | 0   | 0   | 1   | 1   | 0   |
| hsa-mir-1245    | 0   | 0   | 0   | 0   | 0   | 0   |
| hsa-mir-1246    | 83  | 55  | 26  | 56  | 92  | 86  |
| hsa-mir-1247    | 0   | 0   | 0   | 0   | 0   | 0   |
| hsa-mir-1248    | 2   | 2   | 1   | 6   | 4   | 4   |
| hsa-mir-1249    | 1   | 2   | 3   | 2   | 4   | 3   |
| hsa-mir-1250    | 0   | 0   | 0   | 0   | 0   | 0   |
| hsa-mir-1251    | 0   | 0   | 0   | 0   | 0   | 0   |
| hsa-mir-1252    | 2   | 1   | 1   | 1   | 2   | 2   |
| hsa-mir-1253    | 0   | 0   | 0   | 0   | 0   | 0   |
| hsa-mir-1254    | 0   | 1   | 0   | 1   | 1   | 0   |
| hsa-mir-1255a   | 13  | 8   | 8   | 11  | 13  | 8   |
| hsa-mir-1255b-1 | 1   | 0   | 0   | 1   | 1   | 0   |
| hsa-mir-1255b-2 | 1   | 0   | 0   | 0   | 1   | 0   |
| hsa-mir-1256    | 2   | 2   | 1   | 1   | 1   | 0   |
| hsa-mir-1257    | 0   | 0   | 0   | 1   | 1   | 0   |
| hsa-mir-1258    | 0   | 0   | 0   | 0   | 0   | 0   |
| hsa-mir-1259    | 223 | 214 | 197 | 124 | 76  | 237 |
| hsa-mir-125a    | 206 | 336 | 331 | 297 | 266 | 313 |
| hsa-mir-125b-1  | 435 | 673 | 636 | 616 | 549 | 842 |
| hsa-mir-125b-2  | 378 | 611 | 612 | 589 | 514 | 808 |
| hsa-mir-126     | 23  | 27  | 27  | 18  | 17  | 25  |
| hsa-mir-1260    | 0   | 0   | 0   | 0   | 0   | 0   |
| hsa-mir-1260b   | 35  | 48  | 43  | 48  | 39  | 86  |
| hsa-mir-1261    | 0   | 0   | 0   | 0   | 0   | 0   |
| hsa-mir-1262    | 2   | 2   | 2   | 5   | 7   | 3   |
| hsa-mir-1263    | 0   | 0   | 0   | 0   | 0   | 0   |
| hsa-mir-1264    | 0   | 0   | 0   | 0   | 0   | 0   |
| hsa-mir-1265    | 0   | 0   | 0   | 0   | 0   | 0   |
| hsa-mir-1266    | 2   | 2   | 2   | 7   | 5   | 5   |
| hsa-mir-1267    | 0   | 0   | 0   | 0   | 0   | 0   |
| hsa-mir-1268    | 19  | 32  | 10  | 22  | 35  | 26  |
| hsa-mir-1269    | 0   | 0   | 0   | 0   | 0   | 0   |
| hsa-mir-127     | 3   | 4   | 2   | 2   | 2   | 2   |
| hsa-mir-1270-1  | 3   | 3   | 2   | 4   | 4   | 4   |
| hsa-mir-1270-2  | 3   | 3   | 2   | 4   | 4   | 4   |

|                 |      |      |     |     |     |     |
|-----------------|------|------|-----|-----|-----|-----|
| hsa-mir-1271    | 3    | 5    | 3   | 2   | 1   | 1   |
| hsa-mir-1272    | 0    | 0    | 0   | 0   | 0   | 0   |
| hsa-mir-1273    | 0    | 0    | 0   | 0   | 0   | 0   |
| hsa-mir-1273c   | 2    | 1    | 1   | 1   | 1   | 1   |
| hsa-mir-1273d   | 0    | 1    | 0   | 2   | 1   | 1   |
| hsa-mir-1274a   | 12   | 8    | 6   | 4   | 2   | 6   |
| hsa-mir-1274b   | 51   | 52   | 25  | 20  | 17  | 34  |
| hsa-mir-1275    | 47   | 38   | 38  | 56  | 39  | 72  |
| hsa-mir-1276    | 4    | 2    | 3   | 6   | 4   | 9   |
| hsa-mir-1277    | 118  | 128  | 82  | 30  | 34  | 48  |
| hsa-mir-1278    | 1    | 1    | 1   | 2   | 1   | 1   |
| hsa-mir-1279    | 0    | 0    | 0   | 0   | 0   | 0   |
| hsa-mir-128-1   | 77   | 72   | 59  | 84  | 81  | 76  |
| hsa-mir-128-2   | 77   | 72   | 59  | 83  | 79  | 75  |
| hsa-mir-1280    | 45   | 65   | 50  | 23  | 24  | 105 |
| hsa-mir-1281    | 0    | 0    | 0   | 0   | 0   | 0   |
| hsa-mir-1282    | 0    | 0    | 0   | 0   | 1   | 0   |
| hsa-mir-1283-1  | 0    | 0    | 0   | 0   | 0   | 0   |
| hsa-mir-1283-2  | 0    | 0    | 0   | 0   | 0   | 0   |
| hsa-mir-1284    | 1    | 1    | 1   | 0   | 1   | 1   |
| hsa-mir-1285-1  | 74   | 85   | 63  | 162 | 162 | 84  |
| hsa-mir-1285-2  | 71   | 83   | 61  | 159 | 160 | 81  |
| hsa-mir-1286    | 1    | 1    | 1   | 1   | 1   | 1   |
| hsa-mir-1287    | 0    | 1    | 0   | 1   | 1   | 1   |
| hsa-mir-1288    | 0    | 0    | 0   | 0   | 0   | 1   |
| hsa-mir-1289-1  | 0    | 0    | 0   | 1   | 0   | 1   |
| hsa-mir-1289-2  | 0    | 0    | 0   | 1   | 0   | 0   |
| hsa-mir-129-1   | 11   | 14   | 14  | 32  | 31  | 44  |
| hsa-mir-129-2   | 11   | 14   | 13  | 32  | 31  | 44  |
| hsa-mir-1290    | 0    | 0    | 0   | 0   | 0   | 0   |
| hsa-mir-1291    | 2    | 2    | 1   | 9   | 2   | 7   |
| hsa-mir-1292    | 11   | 13   | 9   | 24  | 16  | 17  |
| hsa-mir-1293    | 16   | 19   | 9   | 25  | 24  | 19  |
| hsa-mir-1294    | 1    | 1    | 1   | 1   | 1   | 0   |
| hsa-mir-1295    | 0    | 0    | 0   | 0   | 0   | 0   |
| hsa-mir-1296    | 28   | 56   | 39  | 33  | 32  | 20  |
| hsa-mir-1297    | 1136 | 1139 | 949 | 681 | 881 | 613 |
| hsa-mir-1298    | 0    | 0    | 0   | 0   | 0   | 0   |
| hsa-mir-1299    | 0    | 1    | 0   | 1   | 1   | 1   |
| hsa-mir-1301    | 2    | 3    | 1   | 5   | 4   | 3   |
| hsa-mir-1302-1  | 0    | 0    | 0   | 0   | 0   | 0   |
| hsa-mir-1302-10 | 0    | 0    | 0   | 0   | 0   | 0   |
| hsa-mir-1302-11 | 0    | 0    | 0   | 0   | 0   | 0   |
| hsa-mir-1302-2  | 0    | 0    | 0   | 0   | 0   | 0   |
| hsa-mir-1302-3  | 0    | 0    | 0   | 0   | 0   | 0   |
| hsa-mir-1302-4  | 0    | 0    | 0   | 0   | 0   | 0   |
| hsa-mir-1302-5  | 0    | 0    | 0   | 0   | 0   | 0   |
| hsa-mir-1302-6  | 0    | 0    | 0   | 0   | 0   | 0   |
| hsa-mir-1302-7  | 0    | 0    | 0   | 0   | 0   | 0   |
| hsa-mir-1302-8  | 0    | 0    | 0   | 0   | 0   | 0   |
| hsa-mir-1302-9  | 0    | 0    | 0   | 0   | 0   | 0   |
| hsa-mir-1303    | 6    | 6    | 3   | 5   | 5   | 4   |
| hsa-mir-1304    | 8    | 10   | 10  | 3   | 3   | 2   |

|                |       |       |       |       |       |       |
|----------------|-------|-------|-------|-------|-------|-------|
| hsa-mir-1305   | 11    | 11    | 9     | 9     | 7     | 32    |
| hsa-mir-1306   | 7     | 8     | 6     | 4     | 4     | 3     |
| hsa-mir-1307   | 165   | 333   | 248   | 459   | 330   | 806   |
| hsa-mir-1308   | 1422  | 7661  | 804   | 13756 | 38192 | 797   |
| hsa-mir-130a   | 1321  | 1670  | 1383  | 855   | 1132  | 851   |
| hsa-mir-130b   | 328   | 382   | 264   | 180   | 356   | 132   |
| hsa-mir-132    | 31    | 42    | 23    | 38    | 30    | 32    |
| hsa-mir-1321   | 0     | 0     | 0     | 0     | 0     | 0     |
| hsa-mir-1322   | 0     | 0     | 0     | 0     | 0     | 0     |
| hsa-mir-1323   | 0     | 0     | 0     | 0     | 0     | 0     |
| hsa-mir-1324   | 0     | 0     | 0     | 0     | 0     | 0     |
| hsa-mir-133a-1 | 0     | 0     | 0     | 0     | 0     | 0     |
| hsa-mir-133a-2 | 0     | 0     | 0     | 0     | 0     | 0     |
| hsa-mir-133b   | 0     | 0     | 0     | 0     | 0     | 0     |
| hsa-mir-134    | 1     | 1     | 1     | 1     | 2     | 2     |
| hsa-mir-135a-1 | 1     | 0     | 0     | 0     | 0     | 0     |
| hsa-mir-135a-2 | 1     | 0     | 0     | 0     | 0     | 0     |
| hsa-mir-135b   | 1546  | 2136  | 1821  | 1119  | 1409  | 765   |
| hsa-mir-136    | 1     | 1     | 1     | 0     | 0     | 0     |
| hsa-mir-137    | 292   | 242   | 279   | 169   | 95    | 279   |
| hsa-mir-138-1  | 234   | 280   | 212   | 192   | 170   | 166   |
| hsa-mir-138-2  | 211   | 254   | 193   | 184   | 163   | 160   |
| hsa-mir-139    | 11    | 14    | 10    | 13    | 9     | 7     |
| hsa-mir-140    | 732   | 710   | 694   | 938   | 699   | 906   |
| hsa-mir-141    | 24560 | 23336 | 21130 | 8148  | 8210  | 11984 |
| hsa-mir-142    | 13    | 12    | 11    | 6     | 5     | 5     |
| hsa-mir-143    | 15    | 15    | 16    | 19    | 27    | 14    |
| hsa-mir-144    | 0     | 1     | 0     | 0     | 0     | 0     |
| hsa-mir-145    | 0     | 1     | 0     | 1     | 0     | 0     |
| hsa-mir-1468   | 0     | 0     | 0     | 0     | 0     | 0     |
| hsa-mir-1469   | 0     | 0     | 0     | 0     | 0     | 0     |
| hsa-mir-146a   | 296   | 253   | 234   | 460   | 370   | 423   |
| hsa-mir-146b   | 297   | 253   | 234   | 462   | 372   | 425   |
| hsa-mir-147    | 0     | 0     | 0     | 0     | 0     | 0     |
| hsa-mir-1470   | 0     | 0     | 0     | 0     | 0     | 0     |
| hsa-mir-1471   | 0     | 0     | 0     | 0     | 0     | 0     |
| hsa-mir-147b   | 1     | 1     | 1     | 1     | 0     | 0     |
| hsa-mir-148a   | 4112  | 3795  | 4989  | 13646 | 11379 | 14487 |
| hsa-mir-148b   | 1474  | 1520  | 1272  | 5618  | 4907  | 4310  |
| hsa-mir-149    | 87    | 120   | 74    | 118   | 111   | 38    |
| hsa-mir-150    | 0     | 0     | 0     | 0     | 0     | 0     |
| hsa-mir-151    | 3156  | 2960  | 2693  | 6983  | 4951  | 5879  |
| hsa-mir-152    | 216   | 209   | 262   | 358   | 298   | 443   |
| hsa-mir-153-1  | 0     | 0     | 1     | 0     | 0     | 0     |
| hsa-mir-153-2  | 0     | 0     | 0     | 0     | 0     | 0     |
| hsa-mir-1537   | 0     | 0     | 0     | 0     | 0     | 0     |
| hsa-mir-1538   | 0     | 0     | 0     | 0     | 0     | 0     |
| hsa-mir-1539   | 0     | 0     | 0     | 0     | 0     | 0     |
| hsa-mir-154    | 1     | 1     | 1     | 0     | 0     | 1     |
| hsa-mir-155    | 1     | 1     | 1     | 1     | 0     | 1     |
| hsa-mir-15a    | 1018  | 1068  | 828   | 762   | 819   | 977   |
| hsa-mir-15b    | 676   | 868   | 711   | 680   | 827   | 502   |
| hsa-mir-16-1   | 2888  | 4248  | 3444  | 1932  | 2643  | 1306  |

|                |      |      |      |       |      |      |
|----------------|------|------|------|-------|------|------|
| hsa-mir-16-2   | 2918 | 4280 | 3467 | 1962  | 2676 | 1331 |
| hsa-mir-17     | 4238 | 4280 | 3488 | 3626  | 3013 | 3404 |
| hsa-mir-181a-1 | 438  | 485  | 508  | 611   | 431  | 760  |
| hsa-mir-181a-2 | 420  | 482  | 524  | 600   | 455  | 721  |
| hsa-mir-181b-1 | 223  | 241  | 206  | 332   | 271  | 513  |
| hsa-mir-181b-2 | 216  | 235  | 205  | 317   | 261  | 507  |
| hsa-mir-181c   | 71   | 59   | 34   | 146   | 78   | 120  |
| hsa-mir-181d   | 3    | 4    | 3    | 7     | 4    | 8    |
| hsa-mir-182    | 4673 | 5149 | 5857 | 11123 | 7641 | 6243 |
| hsa-mir-1825   | 0    | 0    | 0    | 0     | 0    | 0    |
| hsa-mir-1826   | 2675 | 3559 | 3891 | 2250  | 1903 | 3937 |
| hsa-mir-1827   | 5    | 5    | 4    | 8     | 10   | 7    |
| hsa-mir-183    | 821  | 880  | 843  | 2244  | 1716 | 1574 |
| hsa-mir-184    | 1    | 1    | 1    | 2     | 3    | 3    |
| hsa-mir-185    | 157  | 124  | 87   | 92    | 108  | 92   |
| hsa-mir-186    | 507  | 465  | 374  | 613   | 398  | 854  |
| hsa-mir-187    | 2    | 2    | 3    | 7     | 7    | 8    |
| hsa-mir-188    | 18   | 20   | 20   | 12    | 12   | 23   |
| hsa-mir-18a    | 1997 | 1976 | 1545 | 1420  | 1095 | 1754 |
| hsa-mir-18b    | 1977 | 1951 | 1529 | 1407  | 1079 | 1740 |
| hsa-mir-190    | 30   | 26   | 20   | 31    | 31   | 30   |
| hsa-mir-1908   | 0    | 1    | 1    | 0     | 0    | 0    |
| hsa-mir-1909   | 0    | 0    | 0    | 0     | 0    | 0    |
| hsa-mir-190b   | 29   | 26   | 19   | 31    | 30   | 30   |
| hsa-mir-191    | 1327 | 1336 | 1094 | 2316  | 1980 | 2073 |
| hsa-mir-1910   | 6    | 5    | 3    | 2     | 3    | 2    |
| hsa-mir-1911   | 0    | 0    | 0    | 0     | 0    | 0    |
| hsa-mir-1912   | 0    | 0    | 0    | 0     | 0    | 0    |
| hsa-mir-1913   | 0    | 0    | 0    | 0     | 0    | 0    |
| hsa-mir-1914   | 0    | 0    | 0    | 0     | 0    | 0    |
| hsa-mir-1915   | 0    | 0    | 0    | 0     | 0    | 0    |
| hsa-mir-192    | 118  | 102  | 106  | 288   | 245  | 364  |
| hsa-mir-193a   | 15   | 31   | 27   | 8     | 12   | 8    |
| hsa-mir-193b   | 673  | 1048 | 1059 | 766   | 633  | 786  |
| hsa-mir-194-1  | 59   | 45   | 48   | 43    | 34   | 61   |
| hsa-mir-194-2  | 60   | 46   | 48   | 44    | 34   | 62   |
| hsa-mir-195    | 2    | 3    | 2    | 1     | 2    | 1    |
| hsa-mir-196a-1 | 113  | 124  | 123  | 137   | 132  | 149  |
| hsa-mir-196a-2 | 138  | 154  | 150  | 164   | 156  | 178  |
| hsa-mir-196b   | 64   | 65   | 57   | 88    | 88   | 96   |
| hsa-mir-197    | 119  | 177  | 172  | 164   | 143  | 90   |
| hsa-mir-1972-1 | 1    | 2    | 1    | 1     | 1    | 1    |
| hsa-mir-1972-2 | 2    | 2    | 1    | 1     | 1    | 1    |
| hsa-mir-1973   | 5    | 15   | 1    | 5     | 7    | 2    |
| hsa-mir-1975   | 302  | 473  | 314  | 347   | 259  | 367  |
| hsa-mir-1976   | 1    | 2    | 2    | 2     | 1    | 2    |
| hsa-mir-1979   | 10   | 21   | 8    | 34    | 41   | 10   |
| hsa-mir-198    | 0    | 0    | 0    | 0     | 0    | 0    |
| hsa-mir-199a-1 | 1    | 2    | 1    | 1     | 1    | 1    |
| hsa-mir-199a-2 | 1    | 2    | 1    | 1     | 1    | 1    |
| hsa-mir-199b   | 1    | 1    | 2    | 2     | 1    | 3    |
| hsa-mir-19a    | 885  | 975  | 727  | 287   | 341  | 282  |
| hsa-mir-19b-1  | 2270 | 3016 | 2079 | 1599  | 1836 | 1105 |

|               |        |        |        |        |        |        |
|---------------|--------|--------|--------|--------|--------|--------|
| hsa-mir-19b-2 | 2241   | 2986   | 2073   | 1589   | 1829   | 1066   |
| hsa-mir-200a  | 24447  | 23238  | 21066  | 8036   | 8103   | 11810  |
| hsa-mir-200b  | 142    | 129    | 143    | 223    | 190    | 244    |
| hsa-mir-200c  | 6619   | 5811   | 5712   | 9377   | 9201   | 12495  |
| hsa-mir-202   | 0      | 1      | 0      | 0      | 0      | 0      |
| hsa-mir-203   | 191    | 160    | 350    | 961    | 528    | 3645   |
| hsa-mir-204   | 0      | 0      | 0      | 0      | 0      | 0      |
| hsa-mir-205   | 4914   | 7561   | 8260   | 6065   | 6156   | 7833   |
| hsa-mir-2052  | 0      | 0      | 0      | 0      | 0      | 0      |
| hsa-mir-2053  | 0      | 0      | 0      | 0      | 0      | 0      |
| hsa-mir-2054  | 9      | 7      | 8      | 5      | 4      | 14     |
| hsa-mir-206   | 0      | 0      | 0      | 0      | 0      | 0      |
| hsa-mir-208a  | 0      | 0      | 0      | 0      | 0      | 0      |
| hsa-mir-208b  | 0      | 0      | 0      | 0      | 0      | 0      |
| hsa-mir-20a   | 8701   | 7874   | 7190   | 7470   | 6064   | 9208   |
| hsa-mir-20b   | 0      | 0      | 0      | 0      | 0      | 0      |
| hsa-mir-21    | 108466 | 104005 | 129377 | 145234 | 102139 | 234270 |
| hsa-mir-210   | 602    | 897    | 748    | 647    | 669    | 917    |
| hsa-mir-211   | 0      | 0      | 0      | 0      | 0      | 0      |
| hsa-mir-2110  | 4      | 6      | 5      | 13     | 14     | 13     |
| hsa-mir-2113  | 0      | 0      | 0      | 0      | 0      | 0      |
| hsa-mir-2114  | 0      | 0      | 0      | 0      | 0      | 0      |
| hsa-mir-2115  | 0      | 0      | 0      | 0      | 0      | 0      |
| hsa-mir-2116  | 3      | 3      | 3      | 3      | 3      | 4      |
| hsa-mir-2117  | 0      | 0      | 0      | 0      | 1      | 0      |
| hsa-mir-212   | 2      | 1      | 1      | 1      | 1      | 1      |
| hsa-mir-214   | 0      | 1      | 1      | 0      | 1      | 0      |
| hsa-mir-215   | 50     | 41     | 27     | 83     | 82     | 78     |
| hsa-mir-216a  | 0      | 0      | 0      | 0      | 0      | 0      |
| hsa-mir-216b  | 0      | 0      | 0      | 0      | 0      | 0      |
| hsa-mir-217   | 0      | 0      | 0      | 0      | 0      | 1      |
| hsa-mir-218-1 | 14     | 19     | 15     | 55     | 66     | 41     |
| hsa-mir-218-2 | 15     | 20     | 15     | 54     | 65     | 41     |
| hsa-mir-219-1 | 5      | 4      | 5      | 5      | 3      | 5      |
| hsa-mir-219-2 | 4      | 4      | 4      | 3      | 3      | 3      |
| hsa-mir-22    | 779    | 950    | 1021   | 672    | 694    | 1194   |
| hsa-mir-220a  | 0      | 0      | 0      | 0      | 0      | 0      |
| hsa-mir-220b  | 0      | 0      | 0      | 0      | 0      | 0      |
| hsa-mir-220c  | 0      | 0      | 0      | 0      | 0      | 0      |
| hsa-mir-221   | 2412   | 3020   | 2265   | 4663   | 4237   | 4295   |
| hsa-mir-222   | 2748   | 3156   | 2123   | 1999   | 1470   | 2122   |
| hsa-mir-223   | 0      | 0      | 0      | 0      | 0      | 0      |
| hsa-mir-224   | 120    | 140    | 85     | 121    | 100    | 84     |
| hsa-mir-2276  | 2      | 2      | 2      | 1      | 1      | 1      |
| hsa-mir-2277  | 6      | 7      | 9      | 2      | 2      | 3      |
| hsa-mir-2278  | 1      | 1      | 1      | 0      | 1      | 1      |
| hsa-mir-2355  | 25     | 25     | 14     | 29     | 23     | 30     |
| hsa-mir-23a   | 13117  | 11145  | 10395  | 17573  | 13841  | 11918  |
| hsa-mir-23b   | 13088  | 11122  | 10383  | 17542  | 13811  | 11879  |
| hsa-mir-24-1  | 72404  | 63966  | 75998  | 27885  | 29248  | 33051  |
| hsa-mir-24-2  | 72400  | 63966  | 75996  | 27885  | 29251  | 33051  |
| hsa-mir-25    | 384    | 437    | 389    | 476    | 462    | 436    |
| hsa-mir-26a-1 | 1839   | 1811   | 1933   | 1345   | 1789   | 1235   |

|                |       |       |       |       |       |       |
|----------------|-------|-------|-------|-------|-------|-------|
| hsa-mir-26a-2  | 1848  | 1820  | 1945  | 1357  | 1814  | 1254  |
| hsa-mir-26b    | 1150  | 1157  | 963   | 692   | 894   | 626   |
| hsa-mir-27a    | 26063 | 27539 | 28150 | 25368 | 23722 | 30321 |
| hsa-mir-27b    | 25691 | 27069 | 27856 | 24868 | 23300 | 29664 |
| hsa-mir-28     | 444   | 492   | 442   | 547   | 526   | 464   |
| hsa-mir-2861   | 0     | 0     | 0     | 0     | 0     | 0     |
| hsa-mir-2909   | 0     | 0     | 0     | 0     | 0     | 0     |
| hsa-mir-296    | 3     | 3     | 2     | 3     | 3     | 3     |
| hsa-mir-297    | 0     | 0     | 0     | 0     | 0     | 0     |
| hsa-mir-298    | 0     | 0     | 0     | 0     | 0     | 0     |
| hsa-mir-299    | 1     | 1     | 1     | 1     | 1     | 1     |
| hsa-mir-29a    | 2718  | 3289  | 2796  | 2248  | 1872  | 3267  |
| hsa-mir-29b-1  | 9417  | 11816 | 10889 | 2824  | 3297  | 2929  |
| hsa-mir-29b-2  | 9391  | 11791 | 10877 | 2807  | 3281  | 2850  |
| hsa-mir-29c    | 9387  | 11792 | 10858 | 2809  | 3283  | 2819  |
| hsa-mir-300    | 0     | 0     | 0     | 0     | 0     | 0     |
| hsa-mir-301a   | 167   | 232   | 151   | 96    | 165   | 58    |
| hsa-mir-301b   | 19    | 33    | 20    | 10    | 22    | 7     |
| hsa-mir-302a   | 0     | 0     | 0     | 0     | 0     | 0     |
| hsa-mir-302b   | 0     | 0     | 0     | 0     | 0     | 0     |
| hsa-mir-302c   | 0     | 0     | 0     | 0     | 0     | 0     |
| hsa-mir-302d   | 0     | 0     | 0     | 0     | 0     | 0     |
| hsa-mir-302e   | 0     | 0     | 0     | 0     | 0     | 0     |
| hsa-mir-302f   | 0     | 0     | 0     | 0     | 0     | 0     |
| hsa-mir-3065   | 39    | 37    | 37    | 71    | 53    | 102   |
| hsa-mir-3074   | 72404 | 63966 | 75998 | 27885 | 29248 | 33051 |
| hsa-mir-30a    | 7206  | 6762  | 7761  | 23491 | 16662 | 21598 |
| hsa-mir-30b    | 3965  | 4494  | 4163  | 3730  | 3663  | 2932  |
| hsa-mir-30c-1  | 3958  | 4489  | 4161  | 3729  | 3661  | 2930  |
| hsa-mir-30c-2  | 3972  | 4500  | 4171  | 3760  | 3680  | 2954  |
| hsa-mir-30d    | 3071  | 3002  | 3110  | 8232  | 6210  | 7937  |
| hsa-mir-30e    | 7059  | 6337  | 8005  | 10059 | 8490  | 13333 |
| hsa-mir-31     | 62522 | 77945 | 73235 | 8066  | 9364  | 4568  |
| hsa-mir-3115   | 0     | 0     | 0     | 0     | 0     | 0     |
| hsa-mir-3116-1 | 0     | 0     | 1     | 0     | 0     | 0     |
| hsa-mir-3116-2 | 0     | 0     | 1     | 0     | 0     | 0     |
| hsa-mir-3117   | 0     | 0     | 0     | 0     | 0     | 0     |
| hsa-mir-3118-1 | 0     | 0     | 0     | 0     | 0     | 0     |
| hsa-mir-3118-2 | 0     | 0     | 0     | 0     | 0     | 0     |
| hsa-mir-3118-3 | 0     | 0     | 0     | 0     | 0     | 0     |
| hsa-mir-3118-4 | 0     | 0     | 0     | 0     | 0     | 0     |
| hsa-mir-3118-5 | 0     | 0     | 0     | 0     | 0     | 0     |
| hsa-mir-3118-6 | 0     | 0     | 0     | 0     | 0     | 0     |
| hsa-mir-3119-1 | 0     | 0     | 0     | 0     | 0     | 0     |
| hsa-mir-3119-2 | 0     | 0     | 0     | 0     | 0     | 0     |
| hsa-mir-3120   | 0     | 1     | 1     | 0     | 1     | 0     |
| hsa-mir-3121   | 1     | 0     | 0     | 1     | 2     | 0     |
| hsa-mir-3122   | 0     | 0     | 0     | 0     | 0     | 0     |
| hsa-mir-3123   | 37    | 82    | 13    | 48    | 111   | 25    |
| hsa-mir-3124   | 0     | 0     | 0     | 0     | 0     | 0     |
| hsa-mir-3125   | 0     | 0     | 0     | 0     | 1     | 0     |
| hsa-mir-3126   | 0     | 0     | 0     | 0     | 0     | 0     |
| hsa-mir-3127   | 0     | 0     | 0     | 0     | 0     | 0     |

|                |    |    |    |    |    |    |
|----------------|----|----|----|----|----|----|
| hsa-mir-3128   | 1  | 0  | 0  | 2  | 1  | 1  |
| hsa-mir-3129   | 0  | 0  | 0  | 0  | 0  | 0  |
| hsa-mir-3130-1 | 2  | 1  | 3  | 3  | 2  | 2  |
| hsa-mir-3130-2 | 2  | 1  | 3  | 3  | 2  | 2  |
| hsa-mir-3130-3 | 2  | 1  | 3  | 3  | 2  | 2  |
| hsa-mir-3130-4 | 2  | 1  | 3  | 3  | 2  | 2  |
| hsa-mir-3131   | 0  | 0  | 0  | 0  | 0  | 0  |
| hsa-mir-3132   | 0  | 0  | 0  | 0  | 0  | 0  |
| hsa-mir-3133   | 0  | 0  | 0  | 1  | 0  | 1  |
| hsa-mir-3134   | 1  | 0  | 1  | 1  | 0  | 0  |
| hsa-mir-3135   | 0  | 0  | 0  | 1  | 1  | 0  |
| hsa-mir-3136   | 0  | 1  | 1  | 2  | 1  | 1  |
| hsa-mir-3137   | 0  | 0  | 0  | 0  | 0  | 0  |
| hsa-mir-3138   | 1  | 1  | 1  | 1  | 1  | 1  |
| hsa-mir-3139   | 0  | 0  | 0  | 0  | 0  | 0  |
| hsa-mir-3140   | 0  | 0  | 0  | 0  | 0  | 0  |
| hsa-mir-3141   | 0  | 0  | 0  | 0  | 0  | 0  |
| hsa-mir-3142   | 0  | 0  | 0  | 1  | 0  | 0  |
| hsa-mir-3143   | 0  | 0  | 0  | 0  | 0  | 0  |
| hsa-mir-3144   | 0  | 0  | 0  | 0  | 0  | 0  |
| hsa-mir-3145   | 0  | 0  | 1  | 1  | 1  | 1  |
| hsa-mir-3146   | 0  | 0  | 0  | 0  | 1  | 0  |
| hsa-mir-3147   | 0  | 0  | 0  | 0  | 0  | 0  |
| hsa-mir-3148   | 0  | 0  | 0  | 0  | 0  | 0  |
| hsa-mir-3149   | 0  | 0  | 0  | 0  | 0  | 0  |
| hsa-mir-3150   | 0  | 1  | 0  | 0  | 1  | 0  |
| hsa-mir-3151   | 0  | 0  | 0  | 0  | 0  | 0  |
| hsa-mir-3152   | 0  | 0  | 0  | 0  | 0  | 0  |
| hsa-mir-3153   | 0  | 0  | 0  | 0  | 0  | 0  |
| hsa-mir-3154   | 0  | 0  | 0  | 0  | 0  | 0  |
| hsa-mir-3155   | 0  | 0  | 0  | 0  | 0  | 0  |
| hsa-mir-3156-1 | 0  | 0  | 0  | 0  | 0  | 0  |
| hsa-mir-3156-2 | 0  | 0  | 0  | 0  | 0  | 0  |
| hsa-mir-3156-3 | 0  | 0  | 0  | 0  | 0  | 0  |
| hsa-mir-3157   | 0  | 1  | 0  | 1  | 1  | 0  |
| hsa-mir-3158-1 | 22 | 19 | 19 | 33 | 33 | 44 |
| hsa-mir-3158-2 | 22 | 19 | 19 | 33 | 33 | 44 |
| hsa-mir-3159   | 0  | 0  | 0  | 0  | 0  | 0  |
| hsa-mir-3160-1 | 0  | 0  | 0  | 0  | 0  | 0  |
| hsa-mir-3160-2 | 0  | 0  | 0  | 0  | 0  | 0  |
| hsa-mir-3161   | 0  | 0  | 0  | 0  | 0  | 0  |
| hsa-mir-3162   | 0  | 0  | 0  | 0  | 0  | 0  |
| hsa-mir-3163   | 0  | 1  | 0  | 1  | 1  | 1  |
| hsa-mir-3164   | 1  | 1  | 2  | 1  | 1  | 1  |
| hsa-mir-3165   | 0  | 0  | 0  | 0  | 0  | 0  |
| hsa-mir-3166   | 1  | 1  | 1  | 2  | 1  | 1  |
| hsa-mir-3167   | 0  | 0  | 1  | 0  | 0  | 0  |
| hsa-mir-3168   | 0  | 0  | 0  | 0  | 0  | 0  |
| hsa-mir-3169   | 0  | 0  | 0  | 0  | 0  | 0  |
| hsa-mir-3170   | 0  | 0  | 0  | 0  | 0  | 0  |
| hsa-mir-3171   | 0  | 0  | 0  | 0  | 0  | 0  |
| hsa-mir-3172   | 14 | 28 | 7  | 38 | 29 | 29 |
| hsa-mir-3173   | 1  | 1  | 0  | 1  | 1  | 1  |



|                |     |     |     |      |      |     |
|----------------|-----|-----|-----|------|------|-----|
| hsa-mir-3174   | 1   | 1   | 1   | 0    | 1    | 0   |
| hsa-mir-3175   | 0   | 0   | 0   | 0    | 0    | 0   |
| hsa-mir-3176   | 6   | 6   | 6   | 7    | 5    | 10  |
| hsa-mir-3177   | 1   | 0   | 1   | 1    | 2    | 1   |
| hsa-mir-3178   | 19  | 25  | 20  | 4    | 3    | 78  |
| hsa-mir-3179-1 | 1   | 0   | 0   | 1    | 0    | 0   |
| hsa-mir-3179-2 | 1   | 0   | 0   | 1    | 0    | 0   |
| hsa-mir-3179-3 | 1   | 0   | 0   | 1    | 0    | 0   |
| hsa-mir-3180-1 | 0   | 0   | 0   | 0    | 0    | 0   |
| hsa-mir-3180-2 | 0   | 0   | 0   | 0    | 0    | 0   |
| hsa-mir-3180-3 | 0   | 0   | 0   | 0    | 0    | 0   |
| hsa-mir-3181   | 0   | 0   | 0   | 0    | 0    | 0   |
| hsa-mir-3182   | 27  | 29  | 26  | 50   | 44   | 56  |
| hsa-mir-3183   | 0   | 0   | 0   | 0    | 0    | 0   |
| hsa-mir-3184   | 829 | 855 | 735 | 1008 | 1263 | 891 |
| hsa-mir-3185   | 0   | 0   | 0   | 0    | 0    | 0   |
| hsa-mir-3186   | 0   | 0   | 0   | 0    | 0    | 0   |
| hsa-mir-3187   | 1   | 3   | 1   | 2    | 1    | 2   |
| hsa-mir-3188   | 0   | 1   | 0   | 0    | 1    | 0   |
| hsa-mir-3189   | 0   | 0   | 0   | 0    | 0    | 0   |
| hsa-mir-3190   | 0   | 0   | 0   | 0    | 0    | 0   |
| hsa-mir-3191   | 0   | 0   | 0   | 0    | 0    | 0   |
| hsa-mir-3192   | 0   | 0   | 0   | 0    | 0    | 0   |
| hsa-mir-3193   | 0   | 0   | 0   | 0    | 0    | 0   |
| hsa-mir-3194   | 0   | 0   | 0   | 0    | 0    | 0   |
| hsa-mir-3195   | 17  | 43  | 16  | 34   | 24   | 22  |
| hsa-mir-3196   | 2   | 3   | 1   | 1    | 1    | 2   |
| hsa-mir-3197   | 0   | 0   | 0   | 0    | 0    | 0   |
| hsa-mir-3198   | 0   | 0   | 0   | 0    | 0    | 0   |
| hsa-mir-3199-1 | 2   | 2   | 2   | 1    | 1    | 2   |
| hsa-mir-3199-2 | 2   | 2   | 2   | 1    | 1    | 2   |
| hsa-mir-32     | 560 | 933 | 582 | 405  | 703  | 261 |
| hsa-mir-3200   | 7   | 9   | 6   | 13   | 7    | 7   |
| hsa-mir-3201   | 0   | 0   | 0   | 0    | 0    | 0   |
| hsa-mir-3202-1 | 0   | 0   | 0   | 0    | 0    | 0   |
| hsa-mir-3202-2 | 0   | 0   | 0   | 0    | 0    | 0   |
| hsa-mir-320a   | 596 | 582 | 445 | 461  | 589  | 354 |
| hsa-mir-320b-1 | 594 | 580 | 443 | 459  | 587  | 347 |
| hsa-mir-320b-2 | 594 | 580 | 443 | 458  | 587  | 347 |
| hsa-mir-320c-1 | 594 | 580 | 442 | 458  | 587  | 346 |
| hsa-mir-320c-2 | 594 | 580 | 442 | 458  | 587  | 346 |
| hsa-mir-320d-1 | 587 | 577 | 438 | 457  | 586  | 340 |
| hsa-mir-320d-2 | 587 | 577 | 438 | 457  | 586  | 340 |
| hsa-mir-320e   | 575 | 565 | 430 | 451  | 573  | 334 |
| hsa-mir-323    | 0   | 1   | 0   | 0    | 0    | 1   |
| hsa-mir-323b   | 0   | 0   | 0   | 0    | 0    | 0   |
| hsa-mir-324    | 59  | 72  | 67  | 59   | 47   | 53  |
| hsa-mir-325    | 0   | 0   | 0   | 0    | 0    | 0   |
| hsa-mir-326    | 0   | 0   | 0   | 0    | 0    | 0   |
| hsa-mir-328    | 3   | 5   | 6   | 4    | 3    | 4   |
| hsa-mir-329-1  | 1   | 0   | 0   | 1    | 1    | 0   |
| hsa-mir-329-2  | 1   | 0   | 0   | 1    | 1    | 0   |
| hsa-mir-330    | 196 | 179 | 167 | 60   | 55   | 51  |

|                |       |       |       |       |       |       |
|----------------|-------|-------|-------|-------|-------|-------|
| hsa-mir-331    | 148   | 156   | 151   | 155   | 133   | 182   |
| hsa-mir-335    | 86    | 87    | 68    | 144   | 148   | 162   |
| hsa-mir-337    | 0     | 0     | 0     | 0     | 0     | 0     |
| hsa-mir-338    | 39    | 37    | 37    | 71    | 53    | 102   |
| hsa-mir-339    | 202   | 243   | 261   | 172   | 145   | 179   |
| hsa-mir-33a    | 795   | 942   | 898   | 170   | 177   | 269   |
| hsa-mir-33b    | 269   | 398   | 453   | 50    | 54    | 99    |
| hsa-mir-340    | 168   | 135   | 89    | 102   | 153   | 77    |
| hsa-mir-342    | 169   | 258   | 239   | 164   | 140   | 138   |
| hsa-mir-345    | 61    | 49    | 41    | 30    | 18    | 23    |
| hsa-mir-346    | 0     | 0     | 0     | 0     | 0     | 0     |
| hsa-mir-34a    | 565   | 579   | 719   | 645   | 694   | 821   |
| hsa-mir-34b    | 67    | 72    | 59    | 46    | 44    | 45    |
| hsa-mir-34c    | 3631  | 4145  | 3437  | 4564  | 5094  | 2699  |
| hsa-mir-361    | 162   | 128   | 138   | 146   | 127   | 184   |
| hsa-mir-362    | 20    | 25    | 20    | 17    | 18    | 18    |
| hsa-mir-363    | 0     | 0     | 0     | 0     | 0     | 0     |
| hsa-mir-365-1  | 179   | 178   | 175   | 215   | 214   | 308   |
| hsa-mir-365-2  | 176   | 173   | 173   | 209   | 207   | 302   |
| hsa-mir-367    | 0     | 0     | 0     | 0     | 0     | 0     |
| hsa-mir-369    | 2     | 1     | 1     | 1     | 2     | 4     |
| hsa-mir-370    | 0     | 0     | 0     | 0     | 0     | 0     |
| hsa-mir-371    | 0     | 0     | 0     | 0     | 0     | 0     |
| hsa-mir-372    | 0     | 0     | 0     | 0     | 0     | 0     |
| hsa-mir-373    | 0     | 0     | 0     | 1     | 0     | 0     |
| hsa-mir-374a   | 1878  | 1733  | 1021  | 4066  | 4178  | 2416  |
| hsa-mir-374b   | 326   | 275   | 209   | 207   | 204   | 146   |
| hsa-mir-375    | 2     | 2     | 3     | 4     | 5     | 4     |
| hsa-mir-376a-1 | 13    | 11    | 12    | 9     | 6     | 17    |
| hsa-mir-376a-2 | 6     | 6     | 7     | 4     | 4     | 4     |
| hsa-mir-376b   | 4     | 4     | 4     | 3     | 2     | 3     |
| hsa-mir-376c   | 9     | 8     | 9     | 4     | 4     | 3     |
| hsa-mir-377    | 2     | 2     | 1     | 1     | 0     | 1     |
| hsa-mir-378    | 35123 | 38004 | 25346 | 64406 | 80185 | 25212 |
| hsa-mir-378b   | 4     | 1     | 0     | 3     | 1     | 1     |
| hsa-mir-378c   | 35117 | 37996 | 25337 | 64398 | 80177 | 25205 |
| hsa-mir-379    | 7     | 9     | 9     | 17    | 20    | 18    |
| hsa-mir-380    | 0     | 0     | 1     | 1     | 1     | 1     |
| hsa-mir-381    | 11    | 10    | 15    | 15    | 14    | 18    |
| hsa-mir-382    | 1     | 0     | 1     | 1     | 1     | 1     |
| hsa-mir-383    | 0     | 0     | 0     | 0     | 0     | 0     |
| hsa-mir-384    | 0     | 0     | 0     | 0     | 0     | 0     |
| hsa-mir-409    | 1     | 1     | 1     | 1     | 1     | 1     |
| hsa-mir-410    | 1     | 0     | 1     | 1     | 1     | 1     |
| hsa-mir-411    | 6     | 8     | 7     | 3     | 3     | 2     |
| hsa-mir-412    | 0     | 0     | 0     | 0     | 0     | 0     |
| hsa-mir-421    | 23    | 24    | 15    | 17    | 20    | 12    |
| hsa-mir-422a   | 0     | 0     | 0     | 0     | 0     | 0     |
| hsa-mir-423    | 829   | 855   | 735   | 1008  | 1263  | 891   |
| hsa-mir-424    | 845   | 1107  | 1237  | 441   | 820   | 518   |
| hsa-mir-425    | 2030  | 2460  | 2033  | 1405  | 1234  | 761   |
| hsa-mir-4251   | 0     | 0     | 0     | 0     | 0     | 0     |
| hsa-mir-4252   | 0     | 0     | 0     | 0     | 0     | 0     |

|                |    |    |    |    |    |    |
|----------------|----|----|----|----|----|----|
| hsa-mir-4253   | 0  | 0  | 0  | 0  | 0  | 0  |
| hsa-mir-4254   | 0  | 0  | 0  | 0  | 0  | 0  |
| hsa-mir-4255   | 0  | 0  | 0  | 0  | 0  | 0  |
| hsa-mir-4256   | 0  | 0  | 0  | 0  | 0  | 0  |
| hsa-mir-4257   | 0  | 0  | 0  | 0  | 0  | 0  |
| hsa-mir-4258   | 0  | 0  | 0  | 0  | 0  | 0  |
| hsa-mir-4259   | 0  | 0  | 0  | 0  | 0  | 0  |
| hsa-mir-4260   | 0  | 0  | 0  | 0  | 0  | 0  |
| hsa-mir-4261   | 0  | 0  | 0  | 0  | 0  | 0  |
| hsa-mir-4262   | 0  | 0  | 0  | 0  | 0  | 0  |
| hsa-mir-4263   | 0  | 0  | 0  | 0  | 0  | 0  |
| hsa-mir-4264   | 0  | 0  | 0  | 0  | 0  | 0  |
| hsa-mir-4265   | 0  | 0  | 0  | 0  | 0  | 0  |
| hsa-mir-4266   | 0  | 0  | 0  | 0  | 0  | 0  |
| hsa-mir-4267   | 0  | 0  | 0  | 0  | 0  | 0  |
| hsa-mir-4268   | 0  | 0  | 0  | 0  | 0  | 0  |
| hsa-mir-4269   | 0  | 0  | 0  | 0  | 0  | 0  |
| hsa-mir-4270   | 0  | 0  | 0  | 0  | 0  | 0  |
| hsa-mir-4271   | 0  | 0  | 0  | 0  | 0  | 0  |
| hsa-mir-4272   | 0  | 0  | 0  | 0  | 0  | 0  |
| hsa-mir-4273   | 0  | 0  | 0  | 0  | 0  | 0  |
| hsa-mir-4274   | 0  | 0  | 0  | 0  | 0  | 0  |
| hsa-mir-4275   | 0  | 0  | 0  | 0  | 0  | 0  |
| hsa-mir-4276   | 0  | 0  | 0  | 0  | 0  | 0  |
| hsa-mir-4277   | 0  | 0  | 0  | 0  | 0  | 0  |
| hsa-mir-4278   | 0  | 0  | 0  | 0  | 0  | 0  |
| hsa-mir-4279   | 0  | 0  | 0  | 0  | 0  | 0  |
| hsa-mir-4280   | 0  | 0  | 0  | 0  | 0  | 0  |
| hsa-mir-4281   | 0  | 0  | 0  | 0  | 0  | 0  |
| hsa-mir-4282   | 0  | 0  | 0  | 0  | 0  | 0  |
| hsa-mir-4283-1 | 0  | 0  | 0  | 0  | 0  | 0  |
| hsa-mir-4283-2 | 0  | 0  | 0  | 0  | 0  | 0  |
| hsa-mir-4284   | 21 | 37 | 9  | 27 | 22 | 13 |
| hsa-mir-4285   | 0  | 0  | 0  | 0  | 0  | 0  |
| hsa-mir-4286   | 1  | 1  | 1  | 1  | 1  | 1  |
| hsa-mir-4287   | 0  | 0  | 0  | 0  | 0  | 0  |
| hsa-mir-4288   | 0  | 0  | 0  | 0  | 0  | 0  |
| hsa-mir-4289   | 0  | 0  | 0  | 0  | 0  | 0  |
| hsa-mir-429    | 38 | 34 | 35 | 67 | 50 | 98 |
| hsa-mir-4290   | 0  | 0  | 0  | 0  | 0  | 0  |
| hsa-mir-4291   | 0  | 0  | 0  | 0  | 0  | 0  |
| hsa-mir-4292   | 0  | 0  | 0  | 0  | 0  | 0  |
| hsa-mir-4293   | 0  | 0  | 0  | 0  | 0  | 0  |
| hsa-mir-4294   | 0  | 0  | 0  | 0  | 0  | 0  |
| hsa-mir-4295   | 0  | 0  | 0  | 0  | 0  | 0  |
| hsa-mir-4296   | 0  | 0  | 0  | 0  | 0  | 0  |
| hsa-mir-4297   | 0  | 0  | 0  | 0  | 0  | 0  |
| hsa-mir-4298   | 0  | 0  | 0  | 0  | 0  | 0  |
| hsa-mir-4299   | 0  | 0  | 0  | 0  | 0  | 0  |
| hsa-mir-4300   | 0  | 0  | 0  | 0  | 0  | 0  |
| hsa-mir-4301   | 0  | 0  | 0  | 0  | 0  | 0  |
| hsa-mir-4302   | 0  | 0  | 0  | 0  | 0  | 0  |
| hsa-mir-4303   | 0  | 0  | 0  | 0  | 0  | 0  |

|                |     |     |     |     |     |     |
|----------------|-----|-----|-----|-----|-----|-----|
| hsa-mir-4304   | 0   | 0   | 0   | 0   | 0   | 0   |
| hsa-mir-4305   | 0   | 0   | 0   | 0   | 0   | 0   |
| hsa-mir-4306   | 153 | 117 | 83  | 88  | 104 | 85  |
| hsa-mir-4307   | 0   | 0   | 0   | 0   | 0   | 0   |
| hsa-mir-4308   | 0   | 0   | 0   | 0   | 0   | 0   |
| hsa-mir-4309   | 0   | 0   | 0   | 0   | 0   | 0   |
| hsa-mir-431    | 0   | 0   | 0   | 0   | 0   | 0   |
| hsa-mir-4310   | 0   | 0   | 0   | 0   | 0   | 0   |
| hsa-mir-4311   | 0   | 0   | 0   | 0   | 0   | 0   |
| hsa-mir-4312   | 0   | 0   | 0   | 0   | 0   | 0   |
| hsa-mir-4313   | 0   | 0   | 0   | 0   | 0   | 0   |
| hsa-mir-4314   | 0   | 0   | 0   | 0   | 0   | 0   |
| hsa-mir-4315-1 | 0   | 0   | 0   | 0   | 0   | 0   |
| hsa-mir-4315-2 | 0   | 0   | 0   | 0   | 0   | 0   |
| hsa-mir-4316   | 0   | 0   | 0   | 0   | 0   | 0   |
| hsa-mir-4317   | 0   | 0   | 0   | 0   | 0   | 0   |
| hsa-mir-4318   | 0   | 0   | 0   | 0   | 0   | 0   |
| hsa-mir-4319   | 0   | 0   | 0   | 0   | 0   | 0   |
| hsa-mir-432    | 0   | 0   | 0   | 0   | 0   | 0   |
| hsa-mir-4320   | 0   | 0   | 0   | 0   | 0   | 0   |
| hsa-mir-4321   | 0   | 0   | 0   | 0   | 0   | 0   |
| hsa-mir-4322   | 0   | 0   | 0   | 0   | 0   | 0   |
| hsa-mir-4323   | 0   | 0   | 0   | 0   | 0   | 0   |
| hsa-mir-4324   | 1   | 1   | 0   | 1   | 1   | 1   |
| hsa-mir-4325   | 0   | 0   | 0   | 0   | 0   | 0   |
| hsa-mir-4326   | 2   | 3   | 2   | 5   | 4   | 3   |
| hsa-mir-4327   | 0   | 0   | 0   | 0   | 0   | 0   |
| hsa-mir-4328   | 0   | 0   | 0   | 0   | 0   | 0   |
| hsa-mir-4329   | 0   | 0   | 0   | 0   | 0   | 0   |
| hsa-mir-433    | 0   | 0   | 0   | 0   | 0   | 0   |
| hsa-mir-4330   | 0   | 0   | 0   | 0   | 0   | 0   |
| hsa-mir-448    | 0   | 0   | 0   | 0   | 0   | 0   |
| hsa-mir-449a   | 1   | 2   | 1   | 1   | 2   | 1   |
| hsa-mir-449b   | 1   | 1   | 1   | 0   | 0   | 0   |
| hsa-mir-449c   | 1   | 1   | 1   | 2   | 1   | 1   |
| hsa-mir-450a-1 | 12  | 18  | 17  | 20  | 19  | 25  |
| hsa-mir-450a-2 | 12  | 18  | 17  | 20  | 19  | 25  |
| hsa-mir-450b   | 8   | 9   | 10  | 14  | 11  | 34  |
| hsa-mir-451    | 1   | 0   | 0   | 0   | 0   | 0   |
| hsa-mir-452    | 365 | 309 | 205 | 407 | 498 | 430 |
| hsa-mir-454    | 108 | 134 | 98  | 140 | 158 | 112 |
| hsa-mir-455    | 250 | 310 | 203 | 301 | 268 | 167 |
| hsa-mir-466    | 0   | 0   | 0   | 0   | 0   | 0   |
| hsa-mir-483    | 0   | 0   | 0   | 0   | 0   | 0   |
| hsa-mir-484    | 37  | 50  | 41  | 43  | 39  | 32  |
| hsa-mir-485    | 0   | 1   | 1   | 1   | 1   | 1   |
| hsa-mir-486    | 1   | 1   | 0   | 2   | 2   | 2   |
| hsa-mir-487a   | 0   | 1   | 1   | 0   | 0   | 0   |
| hsa-mir-487b   | 0   | 1   | 0   | 0   | 0   | 0   |
| hsa-mir-488    | 0   | 0   | 0   | 0   | 0   | 0   |
| hsa-mir-489    | 1   | 1   | 0   | 0   | 0   | 0   |
| hsa-mir-490    | 0   | 0   | 0   | 0   | 0   | 0   |
| hsa-mir-491    | 4   | 4   | 5   | 5   | 3   | 4   |

|                |     |     |     |     |     |     |
|----------------|-----|-----|-----|-----|-----|-----|
| hsa-mir-492    | 0   | 0   | 0   | 0   | 0   | 0   |
| hsa-mir-493    | 0   | 0   | 0   | 0   | 0   | 1   |
| hsa-mir-494    | 5   | 6   | 6   | 3   | 3   | 5   |
| hsa-mir-495    | 2   | 2   | 2   | 2   | 2   | 2   |
| hsa-mir-496    | 0   | 0   | 0   | 1   | 0   | 0   |
| hsa-mir-497    | 2   | 1   | 2   | 2   | 2   | 3   |
| hsa-mir-498    | 0   | 0   | 0   | 0   | 0   | 0   |
| hsa-mir-499    | 2   | 3   | 2   | 1   | 2   | 1   |
| hsa-mir-500    | 30  | 45  | 27  | 41  | 35  | 37  |
| hsa-mir-500b   | 7   | 9   | 7   | 11  | 7   | 8   |
| hsa-mir-501    | 5   | 6   | 4   | 7   | 7   | 9   |
| hsa-mir-502    | 25  | 41  | 23  | 35  | 32  | 32  |
| hsa-mir-503    | 257 | 293 | 372 | 224 | 255 | 304 |
| hsa-mir-504    | 0   | 0   | 0   | 0   | 0   | 0   |
| hsa-mir-505    | 37  | 46  | 34  | 45  | 33  | 24  |
| hsa-mir-506    | 0   | 0   | 0   | 0   | 0   | 0   |
| hsa-mir-507    | 0   | 0   | 0   | 0   | 0   | 0   |
| hsa-mir-508    | 0   | 0   | 0   | 0   | 0   | 0   |
| hsa-mir-509-1  | 0   | 0   | 0   | 0   | 0   | 0   |
| hsa-mir-509-2  | 0   | 0   | 0   | 0   | 0   | 0   |
| hsa-mir-509-3  | 0   | 0   | 0   | 0   | 0   | 0   |
| hsa-mir-510    | 0   | 0   | 0   | 0   | 0   | 0   |
| hsa-mir-511-1  | 0   | 1   | 0   | 0   | 1   | 0   |
| hsa-mir-511-2  | 0   | 1   | 0   | 0   | 1   | 0   |
| hsa-mir-512-1  | 0   | 0   | 0   | 0   | 0   | 0   |
| hsa-mir-512-2  | 0   | 0   | 0   | 0   | 0   | 0   |
| hsa-mir-513a-1 | 0   | 0   | 0   | 0   | 0   | 0   |
| hsa-mir-513a-2 | 0   | 0   | 0   | 0   | 0   | 0   |
| hsa-mir-513b   | 0   | 0   | 0   | 0   | 0   | 0   |
| hsa-mir-513c   | 0   | 0   | 0   | 0   | 0   | 0   |
| hsa-mir-514-1  | 0   | 0   | 0   | 0   | 0   | 1   |
| hsa-mir-514-2  | 0   | 0   | 0   | 0   | 0   | 1   |
| hsa-mir-514-3  | 0   | 0   | 0   | 0   | 0   | 1   |
| hsa-mir-514b   | 0   | 0   | 0   | 0   | 0   | 0   |
| hsa-mir-515-1  | 0   | 0   | 0   | 0   | 0   | 0   |
| hsa-mir-515-2  | 0   | 0   | 0   | 0   | 0   | 0   |
| hsa-mir-516a-1 | 0   | 0   | 0   | 0   | 0   | 0   |
| hsa-mir-516a-2 | 0   | 0   | 0   | 0   | 0   | 0   |
| hsa-mir-516b-1 | 0   | 0   | 0   | 0   | 0   | 0   |
| hsa-mir-516b-2 | 0   | 0   | 0   | 0   | 0   | 0   |
| hsa-mir-517a   | 0   | 0   | 0   | 0   | 0   | 0   |
| hsa-mir-517b   | 0   | 0   | 0   | 0   | 0   | 0   |
| hsa-mir-517c   | 0   | 0   | 0   | 0   | 0   | 0   |
| hsa-mir-518a-1 | 0   | 0   | 0   | 0   | 0   | 0   |
| hsa-mir-518a-2 | 0   | 0   | 0   | 0   | 0   | 0   |
| hsa-mir-518b   | 0   | 0   | 0   | 0   | 0   | 0   |
| hsa-mir-518c   | 0   | 0   | 0   | 0   | 0   | 0   |
| hsa-mir-518d   | 0   | 0   | 0   | 0   | 0   | 0   |
| hsa-mir-518e   | 0   | 0   | 0   | 0   | 0   | 0   |
| hsa-mir-518f   | 0   | 0   | 0   | 0   | 0   | 0   |
| hsa-mir-519a-1 | 0   | 0   | 0   | 0   | 0   | 0   |
| hsa-mir-519a-2 | 0   | 0   | 0   | 0   | 0   | 0   |
| hsa-mir-519b   | 0   | 0   | 0   | 0   | 0   | 0   |

|                |     |     |     |     |     |     |
|----------------|-----|-----|-----|-----|-----|-----|
| hsa-mir-519c   | 0   | 0   | 0   | 0   | 1   | 0   |
| hsa-mir-519d   | 0   | 0   | 0   | 0   | 0   | 0   |
| hsa-mir-519e   | 0   | 0   | 0   | 0   | 0   | 0   |
| hsa-mir-520a   | 0   | 0   | 0   | 0   | 0   | 0   |
| hsa-mir-520b   | 0   | 0   | 0   | 0   | 0   | 0   |
| hsa-mir-520c   | 0   | 0   | 0   | 0   | 0   | 0   |
| hsa-mir-520d   | 0   | 0   | 0   | 0   | 0   | 0   |
| hsa-mir-520e   | 0   | 0   | 0   | 0   | 0   | 0   |
| hsa-mir-520f   | 0   | 0   | 0   | 0   | 0   | 0   |
| hsa-mir-520g   | 0   | 0   | 0   | 0   | 0   | 0   |
| hsa-mir-520h   | 0   | 0   | 0   | 0   | 0   | 0   |
| hsa-mir-521-1  | 0   | 0   | 0   | 0   | 0   | 0   |
| hsa-mir-521-2  | 0   | 0   | 0   | 0   | 0   | 0   |
| hsa-mir-522    | 0   | 0   | 0   | 0   | 0   | 0   |
| hsa-mir-523    | 0   | 0   | 0   | 0   | 0   | 0   |
| hsa-mir-524    | 0   | 0   | 0   | 0   | 0   | 0   |
| hsa-mir-525    | 0   | 0   | 0   | 0   | 0   | 0   |
| hsa-mir-526a-1 | 0   | 0   | 0   | 0   | 0   | 0   |
| hsa-mir-526a-2 | 0   | 0   | 0   | 0   | 0   | 0   |
| hsa-mir-526b   | 0   | 0   | 0   | 0   | 0   | 0   |
| hsa-mir-527    | 0   | 0   | 0   | 0   | 0   | 0   |
| hsa-mir-532    | 77  | 90  | 95  | 104 | 86  | 125 |
| hsa-mir-539    | 1   | 1   | 1   | 0   | 1   | 1   |
| hsa-mir-541    | 0   | 0   | 0   | 0   | 0   | 0   |
| hsa-mir-542    | 170 | 139 | 145 | 210 | 214 | 313 |
| hsa-mir-543    | 0   | 0   | 1   | 0   | 0   | 0   |
| hsa-mir-544    | 0   | 0   | 0   | 0   | 0   | 0   |
| hsa-mir-544b   | 0   | 0   | 0   | 0   | 0   | 0   |
| hsa-mir-545    | 12  | 10  | 7   | 4   | 4   | 3   |
| hsa-mir-548a-1 | 3   | 2   | 2   | 1   | 2   | 3   |
| hsa-mir-548a-2 | 1   | 1   | 1   | 1   | 1   | 1   |
| hsa-mir-548a-3 | 2   | 2   | 1   | 1   | 2   | 2   |
| hsa-mir-548b   | 0   | 0   | 0   | 0   | 1   | 0   |
| hsa-mir-548c   | 1   | 3   | 2   | 2   | 2   | 1   |
| hsa-mir-548d-1 | 5   | 5   | 4   | 4   | 5   | 5   |
| hsa-mir-548d-2 | 7   | 9   | 6   | 5   | 7   | 4   |
| hsa-mir-548e   | 9   | 9   | 6   | 16  | 23  | 19  |
| hsa-mir-548f-1 | 44  | 37  | 23  | 72  | 66  | 65  |
| hsa-mir-548f-2 | 16  | 16  | 6   | 41  | 41  | 22  |
| hsa-mir-548f-3 | 15  | 15  | 6   | 41  | 41  | 21  |
| hsa-mir-548f-4 | 15  | 15  | 6   | 41  | 41  | 21  |
| hsa-mir-548f-5 | 2   | 1   | 1   | 10  | 10  | 5   |
| hsa-mir-548g   | 2   | 1   | 1   | 11  | 11  | 5   |
| hsa-mir-548h-1 | 3   | 2   | 2   | 4   | 3   | 8   |
| hsa-mir-548h-2 | 3   | 2   | 2   | 4   | 3   | 8   |
| hsa-mir-548h-3 | 9   | 8   | 7   | 7   | 7   | 11  |
| hsa-mir-548h-4 | 3   | 2   | 2   | 4   | 3   | 8   |
| hsa-mir-548i-1 | 0   | 0   | 0   | 0   | 0   | 0   |
| hsa-mir-548i-2 | 0   | 0   | 0   | 0   | 0   | 0   |
| hsa-mir-548i-3 | 0   | 0   | 0   | 0   | 0   | 0   |
| hsa-mir-548i-4 | 0   | 0   | 0   | 0   | 0   | 0   |
| hsa-mir-548j   | 3   | 2   | 2   | 4   | 4   | 7   |
| hsa-mir-548k   | 3   | 3   | 3   | 6   | 4   | 6   |

|               |     |     |     |     |     |     |
|---------------|-----|-----|-----|-----|-----|-----|
| hsa-mir-548l  | 2   | 1   | 1   | 1   | 2   | 1   |
| hsa-mir-548m  | 0   | 0   | 0   | 0   | 0   | 0   |
| hsa-mir-548n  | 1   | 1   | 1   | 1   | 1   | 2   |
| hsa-mir-548o  | 11  | 13  | 10  | 15  | 17  | 12  |
| hsa-mir-548p  | 0   | 0   | 1   | 1   | 2   | 1   |
| hsa-mir-548q  | 1   | 1   | 1   | 1   | 0   | 0   |
| hsa-mir-548s  | 13  | 15  | 11  | 16  | 17  | 13  |
| hsa-mir-548t  | 2   | 1   | 1   | 1   | 2   | 2   |
| hsa-mir-548u  | 1   | 2   | 1   | 1   | 3   | 1   |
| hsa-mir-548v  | 2   | 3   | 2   | 1   | 1   | 2   |
| hsa-mir-548w  | 0   | 0   | 1   | 0   | 0   | 0   |
| hsa-mir-548x  | 1   | 1   | 1   | 1   | 1   | 0   |
| hsa-mir-549   | 2   | 0   | 1   | 1   | 0   | 0   |
| hsa-mir-550-1 | 11  | 14  | 11  | 11  | 10  | 9   |
| hsa-mir-550-2 | 11  | 14  | 11  | 11  | 10  | 9   |
| hsa-mir-551a  | 0   | 0   | 0   | 0   | 0   | 0   |
| hsa-mir-551b  | 0   | 0   | 0   | 0   | 0   | 0   |
| hsa-mir-552   | 0   | 0   | 0   | 0   | 0   | 0   |
| hsa-mir-553   | 0   | 0   | 0   | 0   | 0   | 0   |
| hsa-mir-554   | 0   | 0   | 0   | 0   | 0   | 0   |
| hsa-mir-555   | 0   | 0   | 0   | 0   | 0   | 0   |
| hsa-mir-556   | 3   | 3   | 1   | 2   | 2   | 2   |
| hsa-mir-557   | 0   | 0   | 0   | 0   | 0   | 0   |
| hsa-mir-558   | 0   | 0   | 0   | 0   | 0   | 0   |
| hsa-mir-559   | 1   | 1   | 1   | 1   | 1   | 2   |
| hsa-mir-561   | 1   | 1   | 0   | 1   | 1   | 1   |
| hsa-mir-562   | 0   | 0   | 0   | 0   | 0   | 0   |
| hsa-mir-563   | 0   | 0   | 0   | 0   | 0   | 0   |
| hsa-mir-564   | 0   | 0   | 0   | 0   | 0   | 0   |
| hsa-mir-566   | 0   | 0   | 0   | 0   | 0   | 0   |
| hsa-mir-567   | 0   | 0   | 0   | 0   | 0   | 0   |
| hsa-mir-568   | 0   | 0   | 0   | 0   | 0   | 0   |
| hsa-mir-569   | 0   | 0   | 0   | 0   | 0   | 0   |
| hsa-mir-570   | 7   | 7   | 6   | 5   | 6   | 4   |
| hsa-mir-571   | 0   | 0   | 0   | 0   | 0   | 0   |
| hsa-mir-572   | 0   | 0   | 0   | 0   | 0   | 0   |
| hsa-mir-573   | 10  | 9   | 0   | 27  | 13  | 3   |
| hsa-mir-574   | 123 | 190 | 208 | 104 | 88  | 121 |
| hsa-mir-575   | 0   | 0   | 0   | 0   | 0   | 0   |
| hsa-mir-576   | 19  | 17  | 15  | 18  | 21  | 12  |
| hsa-mir-577   | 0   | 0   | 0   | 0   | 0   | 0   |
| hsa-mir-578   | 0   | 0   | 0   | 0   | 0   | 0   |
| hsa-mir-579   | 6   | 6   | 4   | 6   | 5   | 11  |
| hsa-mir-580   | 3   | 2   | 3   | 4   | 3   | 6   |
| hsa-mir-581   | 0   | 0   | 0   | 0   | 0   | 1   |
| hsa-mir-582   | 287 | 276 | 194 | 606 | 465 | 423 |
| hsa-mir-583   | 1   | 1   | 0   | 0   | 1   | 0   |
| hsa-mir-584   | 121 | 107 | 103 | 212 | 145 | 317 |
| hsa-mir-585   | 3   | 5   | 3   | 6   | 4   | 6   |
| hsa-mir-586   | 0   | 0   | 0   | 0   | 0   | 0   |
| hsa-mir-587   | 0   | 0   | 0   | 0   | 0   | 0   |
| hsa-mir-588   | 0   | 0   | 0   | 0   | 0   | 0   |
| hsa-mir-589   | 74  | 88  | 99  | 118 | 83  | 125 |

|             |     |     |     |     |     |     |
|-------------|-----|-----|-----|-----|-----|-----|
| hsa-mir-590 | 312 | 300 | 251 | 125 | 145 | 143 |
| hsa-mir-591 | 0   | 0   | 0   | 0   | 0   | 0   |
| hsa-mir-592 | 0   | 0   | 0   | 0   | 0   | 0   |
| hsa-mir-593 | 0   | 0   | 0   | 0   | 0   | 0   |
| hsa-mir-595 | 0   | 0   | 0   | 0   | 0   | 0   |
| hsa-mir-596 | 0   | 0   | 0   | 0   | 0   | 0   |
| hsa-mir-597 | 2   | 3   | 2   | 1   | 1   | 2   |
| hsa-mir-598 | 208 | 214 | 167 | 436 | 279 | 359 |
| hsa-mir-599 | 0   | 0   | 0   | 0   | 0   | 0   |
| hsa-mir-600 | 0   | 0   | 0   | 0   | 0   | 0   |
| hsa-mir-601 | 0   | 0   | 0   | 0   | 0   | 0   |
| hsa-mir-602 | 0   | 0   | 0   | 0   | 0   | 0   |
| hsa-mir-603 | 1   | 0   | 0   | 1   | 0   | 0   |
| hsa-mir-604 | 0   | 0   | 0   | 0   | 0   | 0   |
| hsa-mir-605 | 0   | 0   | 0   | 0   | 0   | 0   |
| hsa-mir-606 | 0   | 0   | 0   | 0   | 0   | 0   |
| hsa-mir-607 | 0   | 0   | 0   | 1   | 1   | 1   |
| hsa-mir-608 | 0   | 0   | 0   | 0   | 0   | 0   |
| hsa-mir-609 | 0   | 0   | 0   | 0   | 0   | 0   |
| hsa-mir-610 | 0   | 0   | 0   | 0   | 0   | 0   |
| hsa-mir-611 | 0   | 0   | 0   | 0   | 0   | 0   |
| hsa-mir-612 | 0   | 1   | 0   | 1   | 1   | 1   |
| hsa-mir-613 | 0   | 0   | 0   | 0   | 0   | 0   |
| hsa-mir-614 | 0   | 0   | 0   | 0   | 0   | 0   |
| hsa-mir-615 | 30  | 48  | 32  | 30  | 32  | 18  |
| hsa-mir-616 | 1   | 1   | 1   | 1   | 1   | 1   |
| hsa-mir-617 | 0   | 0   | 0   | 0   | 0   | 0   |
| hsa-mir-618 | 0   | 0   | 0   | 0   | 0   | 0   |
| hsa-mir-619 | 0   | 0   | 0   | 0   | 0   | 0   |
| hsa-mir-620 | 0   | 0   | 0   | 0   | 0   | 0   |
| hsa-mir-621 | 0   | 0   | 0   | 0   | 0   | 0   |
| hsa-mir-622 | 0   | 0   | 0   | 0   | 0   | 0   |
| hsa-mir-623 | 0   | 0   | 0   | 0   | 0   | 0   |
| hsa-mir-624 | 12  | 11  | 12  | 8   | 7   | 7   |
| hsa-mir-625 | 50  | 48  | 41  | 26  | 20  | 19  |
| hsa-mir-626 | 0   | 0   | 0   | 0   | 0   | 0   |
| hsa-mir-627 | 85  | 57  | 58  | 77  | 38  | 165 |
| hsa-mir-628 | 3   | 4   | 3   | 5   | 5   | 6   |
| hsa-mir-629 | 24  | 28  | 20  | 37  | 32  | 27  |
| hsa-mir-630 | 0   | 0   | 0   | 0   | 0   | 0   |
| hsa-mir-631 | 0   | 0   | 0   | 0   | 0   | 0   |
| hsa-mir-632 | 0   | 0   | 0   | 0   | 0   | 0   |
| hsa-mir-633 | 0   | 0   | 0   | 0   | 0   | 0   |
| hsa-mir-634 | 0   | 0   | 0   | 0   | 0   | 0   |
| hsa-mir-635 | 0   | 0   | 0   | 0   | 0   | 0   |
| hsa-mir-636 | 1   | 1   | 0   | 0   | 0   | 0   |
| hsa-mir-637 | 0   | 0   | 0   | 0   | 0   | 0   |
| hsa-mir-638 | 0   | 0   | 0   | 0   | 0   | 0   |
| hsa-mir-639 | 0   | 0   | 0   | 0   | 0   | 0   |
| hsa-mir-640 | 0   | 0   | 0   | 0   | 0   | 0   |
| hsa-mir-641 | 4   | 6   | 4   | 2   | 3   | 1   |
| hsa-mir-642 | 2   | 2   | 4   | 1   | 2   | 2   |
| hsa-mir-643 | 2   | 2   | 1   | 2   | 1   | 1   |



|              |      |      |      |      |      |      |
|--------------|------|------|------|------|------|------|
| hsa-mir-644  | 0    | 0    | 0    | 0    | 0    | 0    |
| hsa-mir-645  | 0    | 0    | 0    | 0    | 0    | 0    |
| hsa-mir-646  | 0    | 0    | 0    | 0    | 0    | 0    |
| hsa-mir-647  | 0    | 0    | 0    | 0    | 0    | 0    |
| hsa-mir-648  | 0    | 0    | 0    | 0    | 0    | 0    |
| hsa-mir-649  | 0    | 0    | 0    | 0    | 0    | 0    |
| hsa-mir-650  | 0    | 0    | 0    | 0    | 0    | 0    |
| hsa-mir-651  | 24   | 27   | 19   | 41   | 42   | 45   |
| hsa-mir-652  | 61   | 89   | 78   | 64   | 57   | 56   |
| hsa-mir-653  | 0    | 1    | 0    | 0    | 0    | 1    |
| hsa-mir-654  | 4    | 5    | 3    | 4    | 5    | 4    |
| hsa-mir-655  | 2    | 3    | 1    | 2    | 2    | 1    |
| hsa-mir-656  | 0    | 0    | 0    | 0    | 0    | 0    |
| hsa-mir-657  | 0    | 0    | 0    | 0    | 0    | 0    |
| hsa-mir-658  | 0    | 0    | 0    | 0    | 0    | 0    |
| hsa-mir-659  | 2    | 1    | 1    | 3    | 2    | 4    |
| hsa-mir-660  | 25   | 28   | 29   | 28   | 30   | 38   |
| hsa-mir-661  | 0    | 0    | 0    | 0    | 0    | 0    |
| hsa-mir-662  | 0    | 0    | 0    | 0    | 0    | 0    |
| hsa-mir-663  | 2    | 4    | 1    | 3    | 2    | 6    |
| hsa-mir-663b | 2    | 3    | 1    | 4    | 2    | 1    |
| hsa-mir-664  | 11   | 11   | 12   | 11   | 12   | 13   |
| hsa-mir-665  | 0    | 0    | 0    | 0    | 0    | 0    |
| hsa-mir-668  | 0    | 0    | 0    | 0    | 0    | 0    |
| hsa-mir-670  | 0    | 0    | 0    | 0    | 0    | 0    |
| hsa-mir-671  | 27   | 23   | 27   | 28   | 44   | 79   |
| hsa-mir-675  | 0    | 0    | 0    | 0    | 0    | 0    |
| hsa-mir-7-1  | 196  | 242  | 151  | 1825 | 2960 | 1080 |
| hsa-mir-7-2  | 169  | 207  | 132  | 1790 | 2924 | 1059 |
| hsa-mir-7-3  | 169  | 207  | 132  | 1789 | 2923 | 1059 |
| hsa-mir-708  | 1236 | 1100 | 1145 | 582  | 584  | 736  |
| hsa-mir-711  | 0    | 0    | 0    | 0    | 0    | 0    |
| hsa-mir-718  | 0    | 0    | 0    | 0    | 0    | 0    |
| hsa-mir-720  | 54   | 75   | 42   | 43   | 42   | 79   |
| hsa-mir-744  | 170  | 218  | 206  | 188  | 156  | 199  |
| hsa-mir-758  | 0    | 1    | 0    | 0    | 0    | 0    |
| hsa-mir-759  | 0    | 0    | 0    | 0    | 0    | 0    |
| hsa-mir-760  | 1    | 1    | 1    | 1    | 1    | 1    |
| hsa-mir-761  | 0    | 0    | 0    | 0    | 0    | 0    |
| hsa-mir-762  | 0    | 0    | 0    | 0    | 0    | 0    |
| hsa-mir-764  | 0    | 0    | 0    | 0    | 0    | 0    |
| hsa-mir-765  | 0    | 0    | 0    | 0    | 0    | 0    |
| hsa-mir-766  | 2    | 4    | 3    | 6    | 5    | 4    |
| hsa-mir-767  | 0    | 0    | 0    | 0    | 0    | 0    |
| hsa-mir-769  | 172  | 162  | 164  | 206  | 217  | 209  |
| hsa-mir-770  | 0    | 0    | 0    | 0    | 0    | 0    |
| hsa-mir-802  | 0    | 0    | 0    | 0    | 0    | 0    |
| hsa-mir-873  | 0    | 0    | 0    | 1    | 1    | 1    |
| hsa-mir-874  | 6    | 13   | 11   | 12   | 11   | 10   |
| hsa-mir-875  | 0    | 0    | 0    | 0    | 0    | 0    |
| hsa-mir-876  | 0    | 0    | 0    | 1    | 0    | 0    |
| hsa-mir-877  | 119  | 129  | 63   | 133  | 110  | 105  |
| hsa-mir-885  | 0    | 0    | 0    | 0    | 0    | 0    |

|               |      |      |      |      |      |      |
|---------------|------|------|------|------|------|------|
| hsa-mir-886   | 329  | 373  | 310  | 781  | 719  | 515  |
| hsa-mir-887   | 1    | 1    | 0    | 1    | 0    | 1    |
| hsa-mir-888   | 0    | 0    | 0    | 0    | 0    | 0    |
| hsa-mir-889   | 1    | 1    | 1    | 2    | 1    | 4    |
| hsa-mir-890   | 0    | 0    | 0    | 0    | 0    | 0    |
| hsa-mir-891a  | 0    | 0    | 0    | 1    | 0    | 1    |
| hsa-mir-891b  | 0    | 0    | 0    | 0    | 0    | 0    |
| hsa-mir-892a  | 0    | 0    | 0    | 0    | 0    | 0    |
| hsa-mir-892b  | 0    | 0    | 0    | 0    | 0    | 0    |
| hsa-mir-9-1   | 4    | 4    | 3    | 5    | 6    | 9    |
| hsa-mir-9-2   | 4    | 4    | 3    | 5    | 6    | 9    |
| hsa-mir-9-3   | 4    | 4    | 3    | 6    | 6    | 9    |
| hsa-mir-920   | 0    | 0    | 0    | 0    | 0    | 0    |
| hsa-mir-921   | 0    | 0    | 0    | 0    | 0    | 0    |
| hsa-mir-922   | 0    | 0    | 0    | 0    | 0    | 0    |
| hsa-mir-924   | 0    | 0    | 0    | 0    | 0    | 0    |
| hsa-mir-92a-1 | 1648 | 2168 | 2211 | 2420 | 2149 | 2530 |
| hsa-mir-92a-2 | 1643 | 2159 | 2208 | 2412 | 2142 | 2526 |
| hsa-mir-92b   | 50   | 79   | 67   | 71   | 63   | 63   |
| hsa-mir-93    | 1194 | 1360 | 1076 | 2168 | 1739 | 2206 |
| hsa-mir-933   | 0    | 0    | 0    | 0    | 0    | 0    |
| hsa-mir-934   | 0    | 0    | 1    | 5    | 5    | 9    |
| hsa-mir-935   | 0    | 0    | 0    | 0    | 0    | 0    |
| hsa-mir-936   | 1    | 1    | 0    | 1    | 1    | 0    |
| hsa-mir-937   | 0    | 0    | 0    | 1    | 1    | 0    |
| hsa-mir-938   | 0    | 0    | 0    | 0    | 0    | 0    |
| hsa-mir-939   | 0    | 1    | 0    | 1    | 0    | 1    |
| hsa-mir-940   | 5    | 10   | 6    | 4    | 5    | 4    |
| hsa-mir-941-1 | 48   | 66   | 55   | 146  | 140  | 92   |
| hsa-mir-941-2 | 89   | 123  | 106  | 279  | 270  | 178  |
| hsa-mir-941-3 | 85   | 119  | 106  | 273  | 261  | 175  |
| hsa-mir-942   | 5    | 8    | 4    | 9    | 5    | 4    |
| hsa-mir-943   | 0    | 0    | 0    | 0    | 0    | 0    |
| hsa-mir-944   | 288  | 239  | 188  | 545  | 429  | 604  |
| hsa-mir-95    | 1    | 0    | 1    | 1    | 1    | 1    |
| hsa-mir-96    | 1267 | 1872 | 1682 | 664  | 709  | 518  |
| hsa-mir-98    | 353  | 399  | 292  | 290  | 422  | 223  |
| hsa-mir-99a   | 3903 | 3588 | 3309 | 4113 | 2552 | 5307 |
| hsa-mir-99b   | 1123 | 1384 | 1210 | 3017 | 2113 | 2397 |
