# Supplementary material for: Genome-Wide Small RNA Sequencing and Gene Expression Analysis Reveals a microRNA Profile of Cancer Susceptibility in ATM-Deficient Human Mammary Epithelial Cells
Source: PubMed Central journal article supplement (PMC3669333; doi:10.1371/journal.pone.0064779), 2013-05-31
Supplement: pone.0064779.s002.pdf [file pone.0064779.s002.pdf]

| <b>miRNA ID</b> | <b>WT1-TpM</b> | <b>WT2- TpM</b> | <b>WT3- TpM</b> | <b>ATM1- TpM</b> | <b>ATM2- TpM</b> | <b>ATM3- TpM</b> |
|-----------------|----------------|-----------------|-----------------|------------------|------------------|------------------|
| hsa-mir-338     | 39             | 37              | 37              | 71               | 53               | 102              |
| hsa-mir-720     | 54             | 75              | 42              | 43               | 42               | 79               |
| hsa-mir-196b    | 64             | 65              | 57              | 88               | 88               | 96               |
| hsa-mir-181c    | 71             | 59              | 34              | 146              | 78               | 120              |
| hsa-mir-1285-2  | 71             | 83              | 61              | 159              | 160              | 81               |
| hsa-mir-1285-1  | 74             | 85              | 63              | 162              | 162              | 84               |
| hsa-mir-589     | 74             | 88              | 99              | 118              | 83               | 125              |
| hsa-mir-532     | 77             | 90              | 95              | 104              | 86               | 125              |
| hsa-mir-627     | 85             | 57              | 58              | 77               | 38               | 165              |
| hsa-mir-941-3   | 85             | 119             | 106             | 273              | 261              | 175              |
| hsa-mir-335     | 86             | 87              | 68              | 144              | 148              | 162              |
| hsa-mir-941-2   | 89             | 123             | 106             | 279              | 270              | 178              |
| hsa-mir-454     | 108            | 134             | 98              | 140              | 158              | 112              |
| hsa-mir-196a-1  | 113            | 124             | 123             | 137              | 132              | 149              |
| hsa-mir-1277    | 118            | 128             | 82              | 30               | 34               | 48               |
| hsa-mir-192     | 118            | 102             | 106             | 288              | 245              | 364              |
| hsa-mir-197     | 119            | 177             | 172             | 164              | 143              | 90               |
| hsa-mir-877     | 119            | 129             | 63              | 133              | 110              | 105              |
| hsa-mir-224     | 120            | 140             | 85              | 121              | 100              | 84               |
| hsa-mir-584     | 121            | 107             | 103             | 212              | 145              | 317              |
| hsa-mir-574     | 123            | 190             | 208             | 104              | 88               | 121              |
| hsa-mir-10a     | 129            | 122             | 132             | 136              | 85               | 164              |
| hsa-mir-196a-2  | 138            | 154             | 150             | 164              | 156              | 178              |
| hsa-mir-200b    | 142            | 129             | 143             | 223              | 190              | 244              |
| hsa-mir-331     | 148            | 156             | 151             | 155              | 133              | 182              |
| hsa-mir-4306    | 153            | 117             | 83              | 88               | 104              | 85               |
| hsa-mir-185     | 157            | 124             | 87              | 92               | 108              | 92               |
| hsa-mir-361     | 162            | 128             | 138             | 146              | 127              | 184              |
| hsa-mir-1307    | 165            | 333             | 248             | 459              | 330              | 806              |
| hsa-mir-301a    | 167            | 232             | 151             | 96               | 165              | 58               |
| hsa-mir-340     | 168            | 135             | 89              | 102              | 153              | 77               |
| hsa-mir-7-2     | 169            | 207             | 132             | 1790             | 2924             | 1059             |
| hsa-mir-7-3     | 169            | 207             | 132             | 1789             | 2923             | 1059             |
| hsa-mir-342     | 169            | 258             | 239             | 164              | 140              | 138              |
| hsa-mir-542     | 170            | 139             | 145             | 210              | 214              | 313              |
| hsa-mir-744     | 170            | 218             | 206             | 188              | 156              | 199              |
| hsa-mir-769     | 172            | 162             | 164             | 206              | 217              | 209              |
| hsa-mir-365-2   | 176            | 173             | 173             | 209              | 207              | 302              |
| hsa-mir-365-1   | 179            | 178             | 175             | 215              | 214              | 308              |
| hsa-mir-203     | 191            | 160             | 350             | 961              | 528              | 3645             |
| hsa-mir-330     | 196            | 179             | 167             | 60               | 55               | 51               |
| hsa-mir-7-1     | 196            | 242             | 151             | 1825             | 2960             | 1080             |
| hsa-mir-339     | 202            | 243             | 261             | 172              | 145              | 179              |
| hsa-mir-125a    | 206            | 336             | 331             | 297              | 266              | 313              |
| hsa-mir-598     | 208            | 214             | 167             | 436              | 279              | 359              |
| hsa-mir-138-2   | 211            | 254             | 193             | 184              | 163              | 160              |
| hsa-mir-152     | 216            | 209             | 262             | 358              | 298              | 443              |
| hsa-mir-181b-2  | 216            | 235             | 205             | 317              | 261              | 507              |
| hsa-mir-1259    | 223            | 214             | 197             | 124              | 76               | 237              |
| hsa-mir-181b-1  | 223            | 241             | 206             | 332              | 271              | 513              |
| hsa-mir-138-1   | 234            | 280             | 212             | 192              | 170              | 166              |
| hsa-mir-455     | 250            | 310             | 203             | 301              | 268              | 167              |
| hsa-mir-503     | 257            | 293             | 372             | 224              | 255              | 304              |
| hsa-mir-582     | 287            | 276             | 194             | 606              | 465              | 423              |

|                |      |      |      |       |       |      |
|----------------|------|------|------|-------|-------|------|
| hsa-mir-944    | 288  | 239  | 188  | 545   | 429   | 604  |
| hsa-mir-137    | 292  | 242  | 279  | 169   | 95    | 279  |
| hsa-mir-146a   | 296  | 253  | 234  | 460   | 370   | 423  |
| hsa-mir-146b   | 297  | 253  | 234  | 462   | 372   | 425  |
| hsa-mir-1975   | 302  | 473  | 314  | 347   | 259   | 367  |
| hsa-mir-590    | 312  | 300  | 251  | 125   | 145   | 143  |
| hsa-mir-374b   | 326  | 275  | 209  | 207   | 204   | 146  |
| hsa-mir-130b   | 328  | 382  | 264  | 180   | 356   | 132  |
| hsa-mir-886    | 329  | 373  | 310  | 781   | 719   | 515  |
| hsa-mir-98     | 353  | 399  | 292  | 290   | 422   | 223  |
| hsa-mir-452    | 365  | 309  | 205  | 407   | 498   | 430  |
| hsa-mir-125b-2 | 378  | 611  | 612  | 589   | 514   | 808  |
| hsa-mir-25     | 384  | 437  | 389  | 476   | 462   | 436  |
| hsa-mir-181a-2 | 420  | 482  | 524  | 600   | 455   | 721  |
| hsa-mir-125b-1 | 435  | 673  | 636  | 616   | 549   | 842  |
| hsa-mir-181a-1 | 438  | 485  | 508  | 611   | 431   | 760  |
| hsa-mir-28     | 444  | 492  | 442  | 547   | 526   | 464  |
| hsa-mir-186    | 507  | 465  | 374  | 613   | 398   | 854  |
| hsa-mir-32     | 560  | 933  | 582  | 405   | 703   | 261  |
| hsa-mir-34a    | 565  | 579  | 719  | 645   | 694   | 821  |
| hsa-mir-320e   | 575  | 565  | 430  | 451   | 573   | 334  |
| hsa-mir-320d-1 | 587  | 577  | 438  | 457   | 586   | 340  |
| hsa-mir-320d-2 | 587  | 577  | 438  | 457   | 586   | 340  |
| hsa-mir-320c-2 | 594  | 580  | 442  | 458   | 587   | 346  |
| hsa-mir-320c-1 | 594  | 580  | 442  | 458   | 587   | 346  |
| hsa-mir-320b-1 | 594  | 580  | 443  | 459   | 587   | 347  |
| hsa-mir-320b-2 | 594  | 580  | 443  | 458   | 587   | 347  |
| hsa-mir-320a   | 596  | 582  | 445  | 461   | 589   | 354  |
| hsa-mir-210    | 602  | 897  | 748  | 647   | 669   | 917  |
| hsa-mir-193b   | 673  | 1048 | 1059 | 766   | 633   | 786  |
| hsa-mir-15b    | 676  | 868  | 711  | 680   | 827   | 502  |
| hsa-mir-140    | 732  | 710  | 694  | 938   | 699   | 906  |
| hsa-mir-22     | 779  | 950  | 1021 | 672   | 694   | 1194 |
| hsa-mir-33a    | 795  | 942  | 898  | 170   | 177   | 269  |
| hsa-mir-183    | 821  | 880  | 843  | 2244  | 1716  | 1574 |
| hsa-mir-3184   | 829  | 855  | 735  | 1008  | 1263  | 891  |
| hsa-mir-423    | 829  | 855  | 735  | 1008  | 1263  | 891  |
| hsa-mir-424    | 845  | 1107 | 1237 | 441   | 820   | 518  |
| hsa-mir-19a    | 885  | 975  | 727  | 287   | 341   | 282  |
| hsa-mir-15a    | 1018 | 1068 | 828  | 762   | 819   | 977  |
| hsa-let-7d     | 1079 | 1125 | 1009 | 968   | 1121  | 620  |
| hsa-mir-99b    | 1123 | 1384 | 1210 | 3017  | 2113  | 2397 |
| hsa-mir-1297   | 1136 | 1139 | 949  | 681   | 881   | 613  |
| hsa-mir-26b    | 1150 | 1157 | 963  | 692   | 894   | 626  |
| hsa-mir-93     | 1194 | 1360 | 1076 | 2168  | 1739  | 2206 |
| hsa-mir-708    | 1236 | 1100 | 1145 | 582   | 584   | 736  |
| hsa-let-7e     | 1260 | 1108 | 774  | 1219  | 1552  | 641  |
| hsa-mir-96     | 1267 | 1872 | 1682 | 664   | 709   | 518  |
| hsa-mir-130a   | 1321 | 1670 | 1383 | 855   | 1132  | 851  |
| hsa-mir-191    | 1327 | 1336 | 1094 | 2316  | 1980  | 2073 |
| hsa-mir-1308   | 1422 | 7661 | 804  | 13756 | 38192 | 797  |
| hsa-mir-148b   | 1474 | 1520 | 1272 | 5618  | 4907  | 4310 |
| hsa-mir-135b   | 1546 | 2136 | 1821 | 1119  | 1409  | 765  |
| hsa-mir-92a-2  | 1643 | 2159 | 2208 | 2412  | 2142  | 2526 |
| hsa-mir-92a-1  | 1648 | 2168 | 2211 | 2420  | 2149  | 2530 |

|                  |       |       |       |       |       |       |
|------------------|-------|-------|-------|-------|-------|-------|
| hsa-mir-26a-1    | 1839  | 1811  | 1933  | 1345  | 1789  | 1235  |
| hsa-mir-26a-2    | 1848  | 1820  | 1945  | 1357  | 1814  | 1254  |
| hsa-mir-374a     | 1878  | 1733  | 1021  | 4066  | 4178  | 2416  |
| hsa-mir-18b      | 1977  | 1951  | 1529  | 1407  | 1079  | 1740  |
| hsa-mir-18a      | 1997  | 1976  | 1545  | 1420  | 1095  | 1754  |
| hsa-mir-425      | 2030  | 2460  | 2033  | 1405  | 1234  | 761   |
| hsa-mir-19b-2    | 2241  | 2986  | 2073  | 1589  | 1829  | 1066  |
| hsa-mir-19b-1    | 2270  | 3016  | 2079  | 1599  | 1836  | 1105  |
| hsa-mir-221      | 2412  | 3020  | 2265  | 4663  | 4237  | 4295  |
| hsa-mir-1826     | 2675  | 3559  | 3891  | 2250  | 1903  | 3937  |
| hsa-mir-29a      | 2718  | 3289  | 2796  | 2248  | 1872  | 3267  |
| hsa-mir-222      | 2748  | 3156  | 2123  | 1999  | 1470  | 2122  |
| hsa-mir-16-1     | 2888  | 4248  | 3444  | 1932  | 2643  | 1306  |
| hsa-mir-16-2     | 2918  | 4280  | 3467  | 1962  | 2676  | 1331  |
| hsa-mir-30d      | 3071  | 3002  | 3110  | 8232  | 6210  | 7937  |
| hsa-mir-151      | 3156  | 2960  | 2693  | 6983  | 4951  | 5879  |
| hsa-mir-34c      | 3631  | 4145  | 3437  | 4564  | 5094  | 2699  |
| hsa-mir-106b     | 3827  | 3089  | 2445  | 3195  | 2240  | 4787  |
| hsa-mir-99a      | 3903  | 3588  | 3309  | 4113  | 2552  | 5307  |
| hsa-mir-30c-1    | 3958  | 4489  | 4161  | 3729  | 3661  | 2930  |
| hsa-mir-30b      | 3965  | 4494  | 4163  | 3730  | 3663  | 2932  |
| hsa-mir-30c-2    | 3972  | 4500  | 4171  | 3760  | 3680  | 2954  |
| hsa-mir-100      | 4103  | 3753  | 3364  | 4165  | 2613  | 5374  |
| hsa-mir-148a     | 4112  | 3795  | 4989  | 13646 | 11379 | 14487 |
| hsa-mir-17       | 4238  | 4280  | 3488  | 3626  | 3013  | 3404  |
| hsa-mir-182      | 4673  | 5149  | 5857  | 11123 | 7641  | 6243  |
| hsa-mir-205      | 4914  | 7561  | 8260  | 6065  | 6156  | 7833  |
| hsa-mir-101-2    | 5595  | 5716  | 5705  | 12807 | 12116 | 14022 |
| hsa-mir-101-1    | 5597  | 5718  | 5707  | 12808 | 12117 | 14022 |
| hsa-let-7i       | 5730  | 6061  | 5584  | 4832  | 5468  | 3188  |
| hsa-let-7g       | 5775  | 6073  | 5625  | 4827  | 5460  | 3276  |
| hsa-mir-200c     | 6619  | 5811  | 5712  | 9377  | 9201  | 12495 |
| hsa-mir-30e      | 7059  | 6337  | 8005  | 10059 | 8490  | 13333 |
| hsa-mir-30a      | 7206  | 6762  | 7761  | 23491 | 16662 | 21598 |
| hsa-mir-20a      | 8701  | 7874  | 7190  | 7470  | 6064  | 9208  |
| hsa-mir-29c      | 9387  | 11792 | 10858 | 2809  | 3283  | 2819  |
| hsa-mir-29b-2    | 9391  | 11791 | 10877 | 2807  | 3281  | 2850  |
| hsa-mir-29b-1    | 9417  | 11816 | 10889 | 2824  | 3297  | 2929  |
| hsa-mir-107      | 9857  | 8157  | 7624  | 14928 | 14363 | 16078 |
| hsa-mir-103-1    | 9863  | 8154  | 7631  | 14930 | 14362 | 16131 |
| hsa-mir-103-1-as | 9863  | 8154  | 7631  | 14930 | 14362 | 16131 |
| hsa-mir-103-2-as | 9878  | 8170  | 7638  | 14944 | 14376 | 16141 |
| hsa-mir-103-2    | 9899  | 8193  | 7643  | 14952 | 14385 | 16147 |
| hsa-mir-23b      | 13088 | 11122 | 10383 | 17542 | 13811 | 11879 |
| hsa-mir-23a      | 13117 | 11145 | 10395 | 17573 | 13841 | 11918 |
| hsa-let-7f-2     | 20903 | 20183 | 18486 | 22093 | 29241 | 16649 |
| hsa-let-7f-1     | 20941 | 20208 | 18522 | 22124 | 29249 | 16706 |
| hsa-let-7c       | 21011 | 19761 | 20450 | 26440 | 26902 | 24473 |
| hsa-let-7a-2     | 21109 | 19815 | 20514 | 26499 | 26938 | 24799 |
| hsa-let-7b       | 21264 | 19975 | 20654 | 26757 | 27102 | 24962 |
| hsa-let-7a-1     | 21315 | 20001 | 20740 | 26721 | 27131 | 25236 |
| hsa-let-7a-3     | 21371 | 20045 | 20774 | 26817 | 27194 | 25335 |
| hsa-mir-200a     | 24447 | 23238 | 21066 | 8036  | 8103  | 11810 |
| hsa-mir-141      | 24560 | 23336 | 21130 | 8148  | 8210  | 11984 |
| hsa-mir-27b      | 25691 | 27069 | 27856 | 24868 | 23300 | 29664 |

|                |        |        |        |        |        |        |
|----------------|--------|--------|--------|--------|--------|--------|
| hsa-mir-27a    | 26063  | 27539  | 28150  | 25368  | 23722  | 30321  |
| hsa-mir-378c   | 35117  | 37996  | 25337  | 64398  | 80177  | 25205  |
| hsa-mir-378    | 35123  | 38004  | 25346  | 64406  | 80185  | 25212  |
| hsa-mir-31     | 62522  | 77945  | 73235  | 8066   | 9364   | 4568   |
| hsa-mir-24-2   | 72400  | 63966  | 75996  | 27885  | 29251  | 33051  |
| hsa-mir-24-1   | 72404  | 63966  | 75998  | 27885  | 29248  | 33051  |
| hsa-mir-3074   | 72404  | 63966  | 75998  | 27885  | 29248  | 33051  |
| hsa-mir-21     | 108466 | 104005 | 129377 | 145234 | 102139 | 234270 |
| hsa-mir-1979   | 10     | 21     | 8      | 34     | 41     | 10     |
| hsa-mir-2110   | 4      | 6      | 5      | 13     | 14     | 13     |
| hsa-mir-379    | 7      | 9      | 9      | 17     | 20     | 18     |
| hsa-mir-450b   | 8      | 9      | 10     | 14     | 11     | 34     |
| hsa-mir-548e   | 9      | 9      | 6      | 16     | 23     | 19     |
| hsa-mir-548g   | 2      | 1      | 1      | 11     | 11     | 5      |
| hsa-mir-573    | 10     | 9      | 0      | 27     | 13     | 3      |
| hsa-mir-874    | 6      | 13     | 11     | 12     | 11     | 10     |
| hsa-mir-129-1  | 11     | 14     | 14     | 32     | 31     | 44     |
| hsa-mir-1305   | 11     | 11     | 9      | 9      | 7      | 32     |
| hsa-mir-129-2  | 11     | 14     | 13     | 32     | 31     | 44     |
| hsa-mir-550-1  | 11     | 14     | 11     | 11     | 10     | 9      |
| hsa-mir-550-2  | 11     | 14     | 11     | 11     | 10     | 9      |
| hsa-mir-1292   | 11     | 13     | 9      | 24     | 16     | 17     |
| hsa-mir-139    | 11     | 14     | 10     | 13     | 9      | 7      |
| hsa-mir-381    | 11     | 10     | 15     | 15     | 14     | 18     |
| hsa-mir-548o   | 11     | 13     | 10     | 15     | 17     | 12     |
| hsa-mir-664    | 11     | 11     | 12     | 11     | 12     | 13     |
| hsa-mir-450a-2 | 12     | 18     | 17     | 20     | 19     | 25     |
| hsa-mir-450a-1 | 12     | 18     | 17     | 20     | 19     | 25     |
| hsa-mir-624    | 12     | 11     | 12     | 8      | 7      | 7      |
| hsa-mir-142    | 13     | 12     | 11     | 6      | 5      | 5      |
| hsa-mir-376a-1 | 13     | 11     | 12     | 9      | 6      | 17     |
| hsa-mir-1255a  | 13     | 8      | 8      | 11     | 13     | 8      |
| hsa-mir-548s   | 13     | 15     | 11     | 16     | 17     | 13     |
| hsa-mir-3172   | 14     | 28     | 7      | 38     | 29     | 29     |
| hsa-mir-218-1  | 14     | 19     | 15     | 55     | 66     | 41     |
| hsa-mir-218-2  | 15     | 20     | 15     | 54     | 65     | 41     |
| hsa-mir-143    | 15     | 15     | 16     | 19     | 27     | 14     |
| hsa-mir-193a   | 15     | 31     | 27     | 8      | 12     | 8      |
| hsa-mir-548f-3 | 15     | 15     | 6      | 41     | 41     | 21     |
| hsa-mir-548f-4 | 15     | 15     | 6      | 41     | 41     | 21     |
| hsa-mir-548f-2 | 16     | 16     | 6      | 41     | 41     | 22     |
| hsa-mir-1293   | 16     | 19     | 9      | 25     | 24     | 19     |
| hsa-mir-3195   | 17     | 43     | 16     | 34     | 24     | 22     |
| hsa-mir-188    | 18     | 20     | 20     | 12     | 12     | 23     |
| hsa-mir-301b   | 19     | 33     | 20     | 10     | 22     | 7      |
| hsa-mir-3178   | 19     | 25     | 20     | 4      | 3      | 78     |
| hsa-mir-106a   | 19     | 19     | 19     | 50     | 44     | 57     |
| hsa-mir-1268   | 19     | 32     | 10     | 22     | 35     | 26     |
| hsa-mir-576    | 19     | 17     | 15     | 18     | 21     | 12     |
| hsa-mir-362    | 20     | 25     | 20     | 17     | 18     | 18     |
| hsa-mir-4284   | 21     | 37     | 9      | 27     | 22     | 13     |
| hsa-mir-3158-1 | 22     | 19     | 19     | 33     | 33     | 44     |
| hsa-mir-3158-2 | 22     | 19     | 19     | 33     | 33     | 44     |
| hsa-mir-126    | 23     | 27     | 27     | 18     | 17     | 25     |
| hsa-mir-421    | 23     | 24     | 15     | 17     | 20     | 12     |

|                |     |     |     |     |     |     |
|----------------|-----|-----|-----|-----|-----|-----|
| hsa-mir-629    | 24  | 28  | 20  | 37  | 32  | 27  |
| hsa-mir-651    | 24  | 27  | 19  | 41  | 42  | 45  |
| hsa-mir-2355   | 25  | 25  | 14  | 29  | 23  | 30  |
| hsa-mir-660    | 25  | 28  | 29  | 28  | 30  | 38  |
| hsa-mir-502    | 25  | 41  | 23  | 35  | 32  | 32  |
| hsa-mir-3182   | 27  | 29  | 26  | 50  | 44  | 56  |
| hsa-mir-671    | 27  | 23  | 27  | 28  | 44  | 79  |
| hsa-mir-1296   | 28  | 56  | 39  | 33  | 32  | 20  |
| hsa-mir-190b   | 29  | 26  | 19  | 31  | 30  | 30  |
| hsa-mir-190    | 30  | 26  | 20  | 31  | 31  | 30  |
| hsa-mir-500    | 30  | 45  | 27  | 41  | 35  | 37  |
| hsa-mir-615    | 30  | 48  | 32  | 30  | 32  | 18  |
| hsa-mir-1201   | 31  | 38  | 37  | 57  | 47  | 75  |
| hsa-mir-132    | 31  | 42  | 23  | 38  | 30  | 32  |
| hsa-mir-1260b  | 35  | 48  | 43  | 48  | 39  | 86  |
| hsa-mir-484    | 37  | 50  | 41  | 43  | 39  | 32  |
| hsa-mir-3123   | 37  | 82  | 13  | 48  | 111 | 25  |
| hsa-mir-505    | 37  | 46  | 34  | 45  | 33  | 24  |
| hsa-mir-429    | 38  | 34  | 35  | 67  | 50  | 98  |
| hsa-mir-3065   | 39  | 37  | 37  | 71  | 53  | 102 |
| hsa-mir-548f-1 | 44  | 37  | 23  | 72  | 66  | 65  |
| hsa-mir-1280   | 45  | 65  | 50  | 23  | 24  | 105 |
| hsa-mir-1275   | 47  | 38  | 38  | 56  | 39  | 72  |
| hsa-mir-941-1  | 48  | 66  | 55  | 146 | 140 | 92  |
| hsa-mir-215    | 50  | 41  | 27  | 83  | 82  | 78  |
| hsa-mir-92b    | 50  | 79  | 67  | 71  | 63  | 63  |
| hsa-mir-625    | 50  | 48  | 41  | 26  | 20  | 19  |
| hsa-mir-1274b  | 51  | 52  | 25  | 20  | 17  | 34  |
| hsa-mir-10b    | 58  | 57  | 62  | 124 | 121 | 102 |
| hsa-mir-324    | 59  | 72  | 67  | 59  | 47  | 53  |
| hsa-mir-194-1  | 59  | 45  | 48  | 43  | 34  | 61  |
| hsa-mir-194-2  | 60  | 46  | 48  | 44  | 34  | 62  |
| hsa-mir-345    | 61  | 49  | 41  | 30  | 18  | 23  |
| hsa-mir-652    | 61  | 89  | 78  | 64  | 57  | 56  |
| hsa-mir-34b    | 67  | 72  | 59  | 46  | 44  | 45  |
| hsa-mir-128-2  | 77  | 72  | 59  | 83  | 79  | 75  |
| hsa-mir-128-1  | 77  | 72  | 59  | 84  | 81  | 76  |
| hsa-mir-1246   | 83  | 55  | 26  | 56  | 92  | 86  |
| hsa-mir-149    | 87  | 120 | 74  | 118 | 111 | 38  |
| hsa-mir-33b    | 269 | 398 | 453 | 50  | 54  | 99  |
