# Supplementary material for: Genome-Wide Small RNA Sequencing and Gene Expression Analysis Reveals a microRNA Profile of Cancer Susceptibility in ATM-Deficient Human Mammary Epithelial Cells
Source: PubMed Central journal article supplement (PMC3669333; doi:10.1371/journal.pone.0064779), 2013-05-31
Supplement: pone.0064779.s003.pdf [file pone.0064779.s003.pdf]

| <b>miRNA ID</b>  | <b>Average WT TpM</b> | <b>Average ATM TpM</b> | <b>p-value</b> | <b>Fold Change</b> |
|------------------|-----------------------|------------------------|----------------|--------------------|
| hsa-mir-101-1    | 5674                  | 12982                  | 0.0002         | 2.29               |
| hsa-mir-101-2    | 5672                  | 12982                  | 0.0002         | 2.29               |
| hsa-mir-103-1    | 8549                  | 15141                  | 0.0015         | 1.77               |
| hsa-mir-103-1-as | 8549                  | 15141                  | 0.0015         | 1.77               |
| hsa-mir-103-2    | 8578                  | 15161                  | 0.0015         | 1.77               |
| hsa-mir-103-2-as | 8562                  | 15153                  | 0.0015         | 1.77               |
| hsa-mir-106a     | 19                    | 50                     | 0.0013         | 2.66               |
| hsa-mir-107      | 8546                  | 15123                  | 0.0014         | 1.77               |
| hsa-mir-10b      | 59                    | 115                    | 0.0014         | 1.96               |
| hsa-mir-1201     | 35                    | 60                     | 0.0432         | 1.70               |
| hsa-mir-1277     | 109                   | 37                     | 0.0091         | -2.94              |
| hsa-mir-129-1    | 13                    | 36                     | 0.0055         | 2.77               |
| hsa-mir-129-2    | 13                    | 36                     | 0.0050         | 2.79               |
| hsa-mir-1292     | 11                    | 19                     | 0.0466         | 1.73               |
| hsa-mir-130a     | 1458                  | 946                    | 0.0227         | -1.54              |
| hsa-mir-135b     | 1834                  | 1098                   | 0.0435         | -1.67              |
| hsa-mir-141      | 23009                 | 9447                   | 0.0011         | -2.44              |
| hsa-mir-146a     | 261                   | 418                    | 0.0081         | 1.60               |
| hsa-mir-146b     | 262                   | 420                    | 0.0078         | 1.60               |
| hsa-mir-148a     | 4299                  | 13171                  | 0.0009         | 3.06               |
| hsa-mir-148b     | 1422                  | 4945                   | 0.0008         | 3.48               |
| hsa-mir-151      | 2936                  | 5937                   | 0.0076         | 2.02               |
| hsa-mir-152      | 229                   | 366                    | 0.0387         | 1.60               |
| hsa-mir-16-1     | 3527                  | 1960                   | 0.0470         | -1.80              |
| hsa-mir-16-2     | 3555                  | 1990                   | 0.0477         | -1.79              |
| hsa-mir-183      | 848                   | 1845                   | 0.0082         | 2.18               |
| hsa-mir-191      | 1252                  | 2123                   | 0.0024         | 1.70               |
| hsa-mir-192      | 109                   | 299                    | 0.0057         | 2.75               |
| hsa-mir-193a     | 25                    | 9                      | 0.0392         | -2.63              |
| hsa-mir-19a      | 862                   | 304                    | 0.0017         | -2.84              |
| hsa-mir-200a     | 22917                 | 9316                   | 0.0010         | -2.46              |
| hsa-mir-200b     | 138                   | 219                    | 0.0076         | 1.59               |
| hsa-mir-200c     | 6047                  | 10358                  | 0.0177         | 1.71               |
| hsa-mir-215      | 39                    | 81                     | 0.0037         | 2.07               |
| hsa-mir-218-1    | 16                    | 54                     | 0.0068         | 3.33               |
| hsa-mir-218-2    | 16                    | 54                     | 0.0070         | 3.25               |
| hsa-mir-221      | 2565                  | 4398                   | 0.0024         | 1.71               |
| hsa-mir-24-1     | 70789                 | 30061                  | 0.0005         | -2.35              |
| hsa-mir-24-2     | 70787                 | 30062                  | 0.0005         | -2.35              |
| hsa-mir-29b-1    | 10707                 | 3016                   | 0.0004         | -3.55              |
| hsa-mir-29b-2    | 10687                 | 2979                   | 0.0004         | -3.59              |
| hsa-mir-29c      | 10679                 | 2970                   | 0.0004         | -3.60              |
| hsa-mir-3074     | 70789                 | 30061                  | 0.0005         | -2.35              |
| hsa-mir-30a      | 7243                  | 20584                  | 0.0029         | 2.84               |
| hsa-mir-30d      | 3061                  | 7460                   | 0.0022         | 2.44               |
| hsa-mir-31       | 71234                 | 7333                   | 0.0002         | -9.71              |
| hsa-mir-3158-1   | 20                    | 37                     | 0.0108         | 1.87               |
| hsa-mir-3158-2   | 20                    | 37                     | 0.0108         | 1.87               |

|                |      |      |        |       |
|----------------|------|------|--------|-------|
| hsa-mir-3182   | 27   | 50   | 0.0032 | 1.83  |
| hsa-mir-330    | 180  | 55   | 0.0001 | -3.25 |
| hsa-mir-335    | 80   | 151  | 0.0010 | 1.88  |
| hsa-mir-33a    | 879  | 205  | 0.0002 | -4.28 |
| hsa-mir-33b    | 373  | 68   | 0.0058 | -5.50 |
| hsa-mir-345    | 50   | 24   | 0.0187 | -2.11 |
| hsa-mir-374a   | 1544 | 3553 | 0.0330 | 2.30  |
| hsa-mir-379    | 8    | 18   | 0.0005 | 2.20  |
| hsa-mir-424    | 1063 | 593  | 0.0451 | -1.79 |
| hsa-mir-425    | 2174 | 1133 | 0.0122 | -1.92 |
| hsa-mir-452    | 293  | 445  | 0.0484 | 1.52  |
| hsa-mir-548e   | 8    | 19   | 0.0090 | 2.38  |
| hsa-mir-548f-1 | 35   | 68   | 0.0067 | 1.95  |
| hsa-mir-548f-2 | 13   | 35   | 0.0378 | 2.77  |
| hsa-mir-548f-3 | 12   | 34   | 0.0351 | 2.88  |
| hsa-mir-548f-4 | 12   | 34   | 0.0356 | 2.86  |
| hsa-mir-582    | 252  | 498  | 0.0173 | 1.97  |
| hsa-mir-590    | 287  | 137  | 0.0016 | -2.09 |
| hsa-mir-598    | 196  | 358  | 0.0276 | 1.82  |
| hsa-mir-625    | 46   | 21   | 0.0018 | -2.19 |
| hsa-mir-651    | 24   | 43   | 0.0016 | 1.80  |
| hsa-mir-7-1    | 196  | 1955 | 0.0325 | 9.96  |
| hsa-mir-7-2    | 169  | 1924 | 0.0319 | 11.36 |
| hsa-mir-7-3    | 169  | 1924 | 0.0319 | 11.36 |
| hsa-mir-708    | 1160 | 634  | 0.0012 | -1.83 |
| hsa-mir-886    | 337  | 672  | 0.0154 | 1.99  |
| hsa-mir-93     | 1210 | 2037 | 0.0084 | 1.68  |
| hsa-mir-941-1  | 56   | 126  | 0.0181 | 2.24  |
| hsa-mir-941-2  | 106  | 242  | 0.0154 | 2.29  |
| hsa-mir-941-3  | 104  | 237  | 0.0146 | 2.28  |
| hsa-mir-944    | 238  | 526  | 0.0082 | 2.21  |
| hsa-mir-96     | 1607 | 630  | 0.0065 | -2.55 |
| hsa-mir-99b    | 1239 | 2509 | 0.0103 | 2.02  |
