# Supplementary material for: Genome-Wide Small RNA Sequencing and Gene Expression Analysis Reveals a microRNA Profile of Cancer Susceptibility in ATM-Deficient Human Mammary Epithelial Cells
Source: PubMed Central journal article supplement (PMC3669333; doi:10.1371/journal.pone.0064779), 2013-05-31
Supplement: pone.0064779.s004.pdf [file pone.0064779.s004.pdf]

| <u>Probeset ID</u> | <u>GeneName</u> | <u>p-value</u> | <u>Fold Change</u> |
|--------------------|-----------------|----------------|--------------------|
| A_32_P29140        | AA344632        | 0.0146         | -2.90              |
| A_32_P40424        | AA630774        | 0.0024         | -1.55              |
| A_23_P152505       | ABAT            | 0.0098         | 2.11               |
| A_23_P158976       | ABCC2           | 0.0495         | 1.77               |
| A_24_P142141       | ABHD2           | 0.0098         | -3.22              |
| A_23_P305759       | ABHD3           | 0.0367         | -2.07              |
| A_23_P256205       | ABLIM3          | 0.0311         | 1.60               |
| A_23_P107166       | ACBD4           | 0.0305         | 1.51               |
| A_23_P316381       | ACOX3           | 0.0271         | 1.53               |
| A_23_P120594       | ACSS1           | 0.0333         | 3.35               |
| A_24_P276947       | ACTR2           | 0.0127         | -1.79              |
| A_23_P137786       | ADAMTSL4        | 0.0114         | 2.21               |
| A_23_P391938       | ADAMTSL4        | 0.0146         | 2.51               |
| A_24_P416177       | ADCY7           | 0.0339         | -1.89              |
| A_24_P302406       | AF086286        | 0.0107         | -1.53              |
| A_24_P652510       | AF086529        | 0.0348         | -1.71              |
| A_24_P915361       | AF086536        | 0.0191         | 1.66               |
| A_23_P256903       | AF086546        | 0.0079         | -1.95              |
| A_24_P933138       | AF087999        | 0.0289         | 1.61               |
| A_32_P99171        | AF131762        | 0.0177         | -2.48              |
| A_24_P298495       | AF289590        | 0.0028         | 1.75               |
| A_23_P355289       | AFG3L1          | 0.0393         | 1.58               |
| A_32_P167705       | AGBL2           | 0.0079         | 1.99               |
| A_23_P356466       | AGPAT3          | 0.0037         | 1.98               |
| A_23_P344400       | AHRR            | 0.0121         | -2.39              |
| A_32_P190222       | AI167420        | 0.0129         | -1.52              |
| A_32_P180538       | AI354226        | 0.0036         | -1.62              |
| A_24_P683905       | AK001829        | 0.0267         | 1.71               |
| A_24_P269006       | AK021800        | 0.0121         | 1.53               |
| A_24_P642758       | AK022479        | 0.0059         | 1.98               |
| A_32_P83256        | AK023663        | 0.0007         | -3.39              |
| A_32_P387905       | AK024224        | 0.0022         | -2.52              |
| A_24_P84370        | AK024470        | 0.0438         | 2.39               |
| A_24_P133171       | AK026078        | 0.0427         | -1.83              |
| A_32_P20703        | AK026418        | 0.0484         | 2.09               |
| A_23_P399292       | AK027091        | 0.0246         | 2.40               |
| A_24_P606239       | AK056073        | 0.0370         | 1.84               |
| A_32_P190049       | AK056809        | 0.0320         | -1.62              |
| A_32_P92281        | AK091784        | 0.0090         | 1.60               |
| A_24_P256404       | AK093202        | 0.0334         | 1.65               |
| A_32_P24741        | AK093729        | 0.0051         | 2.12               |

|              |          |        |       |
|--------------|----------|--------|-------|
| A_32_P41375  | AK093729 | 0.0081 | 2.28  |
| A_32_P50406  | AK093729 | 0.0132 | 2.13  |
| A_32_P204330 | AK093982 | 0.0071 | 1.64  |
| A_24_P397903 | AK094296 | 0.0083 | -1.83 |
| A_32_P213615 | AK096778 | 0.0466 | 2.41  |
| A_23_P315252 | AK097322 | 0.0058 | 1.54  |
| A_32_P51518  | AK098220 | 0.0461 | 2.48  |
| A_24_P367576 | AK125170 | 0.0220 | 1.56  |
| A_24_P714134 | AK126814 | 0.0408 | -1.92 |
| A_32_P188752 | AK129584 | 0.0193 | 1.53  |
| A_23_P418477 | AKAP11   | 0.0340 | 1.72  |
| A_24_P164337 | AKAP13   | 0.0265 | -1.54 |
| A_24_P312578 | AKR1C1   | 0.0024 | -1.53 |
| A_32_P155841 | AL079294 | 0.0237 | 1.70  |
| A_23_P205959 | ALDH1A3  | 0.0462 | -1.85 |
| A_23_P207213 | ALDH3A1  | 0.0180 | -1.78 |
| A_23_P137116 | AMMECR1  | 0.0126 | -2.02 |
| A_23_P257164 | AMT      | 0.0244 | 1.59  |
| A_24_P220771 | ANKRD17  | 0.0212 | -1.51 |
| A_23_P161428 | ANKRD22  | 0.0357 | 2.51  |
| A_32_P51237  | ANKRD38  | 0.0363 | 3.93  |
| A_24_P345846 | ANTXR2   | 0.0192 | -1.95 |
| A_32_P148345 | ANXA2    | 0.0004 | -1.55 |
| A_23_P395054 | ANXA8    | 0.0148 | 1.80  |
| A_23_P103617 | ANXA9    | 0.0276 | 2.04  |
| A_23_P154037 | AOX1     | 0.0079 | -1.57 |
| A_24_P190804 | AP1S2    | 0.0153 | -2.01 |
| A_23_P217384 | AP1S2    | 0.0371 | -1.83 |
| A_23_P29237  | APOL3    | 0.0304 | 2.98  |
| A_23_P95050  | ARFIP1   | 0.0105 | -1.93 |
| A_24_P920207 | ARHGAP23 | 0.0397 | 1.81  |
| A_23_P332326 | ARHGEF19 | 0.0454 | 2.19  |
| A_23_P98252  | ARL2     | 0.0112 | -1.70 |
| A_23_P129466 | ATF7IP2  | 0.0355 | 2.34  |
| A_23_P35916  | ATM      | 0.0005 | -2.98 |
| A_23_P157478 | ATP6V1H  | 0.0437 | -1.79 |
| A_32_P127501 | AV753543 | 0.0234 | 1.91  |
| A_32_P42895  | AW138903 | 0.0170 | 2.34  |
| A_32_P106615 | AW268902 | 0.0157 | 3.93  |
| A_32_P146169 | AW673984 | 0.0004 | -1.50 |
| A_32_P128588 | AW851396 | 0.0145 | -1.60 |
| A_24_P810735 | AX721128 | 0.0296 | -1.66 |

|              |              |        |       |
|--------------|--------------|--------|-------|
| A_23_P136857 | A_23_P136857 | 0.0141 | -1.65 |
| A_23_P140454 | A_23_P140454 | 0.0438 | 1.51  |
| A_23_P251196 | A_23_P251196 | 0.0115 | 1.69  |
| A_23_P300563 | A_23_P300563 | 0.0056 | -1.53 |
| A_23_P75129  | A_23_P75129  | 0.0021 | -1.77 |
| A_24_P101211 | A_24_P101211 | 0.0223 | -1.58 |
| A_24_P110201 | A_24_P110201 | 0.0197 | -1.59 |
| A_24_P118411 | A_24_P118411 | 0.0038 | -2.45 |
| A_24_P118953 | A_24_P118953 | 0.0175 | -1.97 |
| A_24_P127042 | A_24_P127042 | 0.0319 | -1.87 |
| A_24_P127362 | A_24_P127362 | 0.0306 | -1.54 |
| A_24_P136155 | A_24_P136155 | 0.0047 | 1.91  |
| A_24_P144314 | A_24_P144314 | 0.0286 | -1.93 |
| A_24_P144337 | A_24_P144337 | 0.0473 | -1.52 |
| A_24_P152278 | A_24_P152278 | 0.0407 | -1.79 |
| A_24_P169903 | A_24_P169903 | 0.0250 | -2.07 |
| A_24_P196019 | A_24_P196019 | 0.0098 | -1.56 |
| A_24_P196134 | A_24_P196134 | 0.0499 | -1.75 |
| A_24_P213256 | A_24_P213256 | 0.0332 | -1.69 |
| A_24_P221475 | A_24_P221475 | 0.0239 | -1.77 |
| A_24_P230388 | A_24_P230388 | 0.0050 | -1.95 |
| A_24_P234871 | A_24_P234871 | 0.0006 | 2.41  |
| A_24_P237820 | A_24_P237820 | 0.0332 | -2.14 |
| A_24_P247576 | A_24_P247576 | 0.0062 | -1.55 |
| A_24_P24890  | A_24_P24890  | 0.0371 | -1.74 |
| A_24_P255123 | A_24_P255123 | 0.0173 | -1.95 |
| A_24_P256050 | A_24_P256050 | 0.0092 | -2.13 |
| A_24_P272653 | A_24_P272653 | 0.0296 | -1.61 |
| A_24_P289043 | A_24_P289043 | 0.0073 | -1.72 |
| A_24_P289504 | A_24_P289504 | 0.0179 | -1.70 |
| A_24_P290188 | A_24_P290188 | 0.0329 | -1.53 |
| A_24_P298099 | A_24_P298099 | 0.0091 | -1.58 |
| A_24_P298616 | A_24_P298616 | 0.0204 | -1.65 |
| A_24_P321184 | A_24_P321184 | 0.0176 | -1.76 |
| A_24_P324506 | A_24_P324506 | 0.0224 | -1.57 |
| A_24_P324538 | A_24_P324538 | 0.0043 | -1.77 |
| A_24_P332721 | A_24_P332721 | 0.0331 | -2.13 |
| A_24_P333052 | A_24_P333052 | 0.0146 | -2.31 |
| A_24_P341731 | A_24_P341731 | 0.0115 | -1.51 |
| A_24_P358337 | A_24_P358337 | 0.0481 | -1.55 |
| A_24_P366465 | A_24_P366465 | 0.0148 | -2.09 |
| A_24_P366768 | A_24_P366768 | 0.0270 | -1.73 |

|              |              |        |       |
|--------------|--------------|--------|-------|
| A_24_P367249 | A_24_P367249 | 0.0239 | -1.53 |
| A_24_P375573 | A_24_P375573 | 0.0048 | -1.77 |
| A_24_P383802 | A_24_P383802 | 0.0308 | -1.60 |
| A_24_P384196 | A_24_P384196 | 0.0072 | -1.52 |
| A_24_P392622 | A_24_P392622 | 0.0490 | -1.92 |
| A_24_P400616 | A_24_P400616 | 0.0345 | -1.53 |
| A_24_P409440 | A_24_P409440 | 0.0044 | -1.64 |
| A_24_P41662  | A_24_P41662  | 0.0233 | -1.51 |
| A_24_P50281  | A_24_P50281  | 0.0178 | -2.14 |
| A_24_P50381  | A_24_P50381  | 0.0217 | -2.17 |
| A_24_P518369 | A_24_P518369 | 0.0141 | -2.31 |
| A_24_P521544 | A_24_P521544 | 0.0205 | -1.67 |
| A_24_P524164 | A_24_P524164 | 0.0368 | -3.18 |
| A_24_P530900 | A_24_P530900 | 0.0297 | -2.48 |
| A_24_P541482 | A_24_P541482 | 0.0120 | -2.20 |
| A_24_P541483 | A_24_P541483 | 0.0032 | -1.54 |
| A_24_P565898 | A_24_P565898 | 0.0408 | -1.56 |
| A_24_P585660 | A_24_P585660 | 0.0364 | -2.80 |
| A_24_P596251 | A_24_P596251 | 0.0219 | -3.18 |
| A_24_P607195 | A_24_P607195 | 0.0006 | 1.79  |
| A_24_P625898 | A_24_P625898 | 0.0114 | -1.66 |
| A_24_P67378  | A_24_P67378  | 0.0300 | -2.56 |
| A_24_P701814 | A_24_P701814 | 0.0222 | -1.96 |
| A_24_P7040   | A_24_P7040   | 0.0371 | 1.54  |
| A_24_P713893 | A_24_P713893 | 0.0027 | -1.92 |
| A_24_P739582 | A_24_P739582 | 0.0131 | -1.73 |
| A_24_P75708  | A_24_P75708  | 0.0233 | -2.41 |
| A_24_P7820   | A_24_P7820   | 0.0049 | -2.16 |
| A_24_P786713 | A_24_P786713 | 0.0207 | -2.29 |
| A_24_P793228 | A_24_P793228 | 0.0137 | -1.54 |
| A_24_P832737 | A_24_P832737 | 0.0103 | -1.52 |
| A_24_P834646 | A_24_P834646 | 0.0468 | -1.58 |
| A_24_P84482  | A_24_P84482  | 0.0265 | -1.63 |
| A_24_P872359 | A_24_P872359 | 0.0025 | -1.61 |
| A_24_P882666 | A_24_P882666 | 0.0013 | -2.91 |
| A_24_P891265 | A_24_P891265 | 0.0101 | -1.52 |
| A_24_P900721 | A_24_P900721 | 0.0186 | -1.60 |
| A_24_P915675 | A_24_P915675 | 0.0048 | -2.13 |
| A_24_P92973  | A_24_P92973  | 0.0020 | -1.73 |
| A_24_P942151 | A_24_P942151 | 0.0350 | -1.84 |
| A_32_P112401 | A_32_P112401 | 0.0463 | -1.80 |
| A_32_P127412 | A_32_P127412 | 0.0280 | -2.03 |

|              |              |        |       |
|--------------|--------------|--------|-------|
| A_32_P148047 | A_32_P148047 | 0.0384 | 1.66  |
| A_32_P152696 | A_32_P152696 | 0.0207 | 1.71  |
| A_32_P167723 | A_32_P167723 | 0.0006 | -1.58 |
| A_32_P169383 | A_32_P169383 | 0.0056 | 1.56  |
| A_32_P171043 | A_32_P171043 | 0.0314 | -1.88 |
| A_32_P192354 | A_32_P192354 | 0.0053 | -1.57 |
| A_32_P194182 | A_32_P194182 | 0.0180 | 2.21  |
| A_32_P20717  | A_32_P20717  | 0.0141 | -1.78 |
| A_32_P23187  | A_32_P23187  | 0.0236 | -2.75 |
| A_32_P233769 | A_32_P233769 | 0.0122 | -1.91 |
| A_32_P36835  | A_32_P36835  | 0.0087 | 1.57  |
| A_32_P41235  | A_32_P41235  | 0.0210 | -1.58 |
| A_32_P51313  | A_32_P51313  | 0.0158 | -1.68 |
| A_32_P55414  | A_32_P55414  | 0.0256 | 1.88  |
| A_32_P55438  | A_32_P55438  | 0.0144 | 1.93  |
| A_32_P58029  | A_32_P58029  | 0.0422 | 1.90  |
| A_32_P64025  | A_32_P64025  | 0.0244 | 1.58  |
| A_32_P64928  | A_32_P64928  | 0.0278 | -1.59 |
| A_32_P69987  | A_32_P69987  | 0.0165 | -1.81 |
| A_32_P725839 | A_32_P725839 | 0.0096 | -1.57 |
| A_32_P79515  | A_32_P79515  | 0.0490 | 1.55  |
| A_32_P82119  | A_32_P82119  | 0.0145 | -1.84 |
| A_23_P500956 | B3GNT2       | 0.0086 | -1.90 |
| A_23_P118946 | B4GALT6      | 0.0260 | -2.53 |
| A_24_P228228 | B4GALT6      | 0.0402 | -2.28 |
| A_23_P52207  | BAMBI        | 0.0254 | -1.76 |
| A_23_P127495 | BBOX1        | 0.0193 | 21.04 |
| A_24_P145103 | BC001335     | 0.0420 | 1.76  |
| A_23_P310295 | BC002811     | 0.0151 | -1.52 |
| A_32_P114447 | BC013799     | 0.0107 | -1.53 |
| A_32_P159574 | BC028022     | 0.0072 | 1.50  |
| A_32_P178635 | BC033590     | 0.0094 | 2.18  |
| A_24_P576219 | BC035091     | 0.0048 | 2.36  |
| A_24_P490857 | BC037535     | 0.0128 | -1.50 |
| A_32_P182186 | BC041955     | 0.0375 | 2.47  |
| A_23_P300484 | BC061909     | 0.0325 | 2.00  |
| A_23_P359174 | BC069659     | 0.0083 | 2.85  |
| A_32_P7516   | BC071773     | 0.0120 | 2.37  |
| A_32_P91107  | BC089156     | 0.0136 | 1.62  |
| A_24_P161725 | BC089388     | 0.0174 | 2.18  |
| A_32_P166760 | BE074871     | 0.0113 | -1.53 |
| A_32_P103474 | BE144057     | 0.0170 | -1.93 |

|              |           |        |       |
|--------------|-----------|--------|-------|
| A_32_P54987  | BE881987  | 0.0406 | -2.08 |
| A_23_P76480  | BF213738  | 0.0004 | -3.26 |
| A_32_P142827 | BF370042  | 0.0279 | 1.85  |
| A_24_P118341 | BF869497  | 0.0368 | -2.24 |
| A_32_P171903 | BG209623  | 0.0349 | -2.15 |
| A_32_P112452 | BI026064  | 0.0285 | -1.74 |
| A_23_P404667 | BIK       | 0.0078 | -1.91 |
| A_23_P165333 | BIN1      | 0.0125 | 1.73  |
| A_24_P156993 | BIN1      | 0.0154 | 1.67  |
| A_23_P98350  | BIRC3     | 0.0006 | -1.55 |
| A_23_P310911 | BLMH      | 0.0043 | 1.63  |
| A_23_P141606 | BLMH      | 0.0122 | 1.69  |
| A_24_P119259 | BLZF1     | 0.0051 | -1.79 |
| A_32_P76865  | BM979049  | 0.0390 | -1.91 |
| A_24_P303989 | BMI1      | 0.0283 | -1.94 |
| A_23_P143331 | BMP2      | 0.0047 | -3.23 |
| A_23_P19624  | BMP6      | 0.0464 | -2.85 |
| A_24_P118531 | BP290435  | 0.0257 | -1.89 |
| A_32_P6323   | BQ014459  | 0.0091 | -1.50 |
| A_32_P128960 | BQ014494  | 0.0293 | -1.56 |
| A_32_P207789 | BQ017638  | 0.0216 | 1.81  |
| A_24_P180849 | BSPRY     | 0.0199 | 1.56  |
| A_23_P39465  | BST2      | 0.0435 | 1.94  |
| A_32_P57013  | BU540282  | 0.0291 | 1.72  |
| A_32_P85495  | BU742669  | 0.0212 | -1.63 |
| A_32_P23517  | BU753102  | 0.0265 | -1.50 |
| A_32_P124833 | BX100088  | 0.0247 | 1.52  |
| A_32_P228886 | BX115350  | 0.0458 | 1.81  |
| A_24_P924389 | BZW1      | 0.0258 | -2.18 |
| A_24_P882914 | C10orf46  | 0.0129 | -1.81 |
| A_23_P353726 | C10orf46  | 0.0232 | -1.73 |
| A_23_P430902 | C10orf83  | 0.0417 | 1.65  |
| A_23_P1722   | C11orf52  | 0.0171 | 1.67  |
| A_32_P185701 | C11orf67  | 0.0368 | 1.81  |
| A_24_P398781 | C14orf179 | 0.0196 | 1.51  |
| A_23_P50674  | C19orf36  | 0.0009 | -1.78 |
| A_23_P103433 | C1orf102  | 0.0312 | 1.73  |
| A_23_P256142 | C1orf108  | 0.0006 | -2.51 |
| A_23_P256148 | C1orf108  | 0.0014 | -1.83 |
| A_24_P233786 | C1orf24   | 0.0269 | 2.76  |
| A_23_P12147  | C1orf74   | 0.0391 | 1.64  |
| A_24_P323941 | C20orf106 | 0.0003 | -1.62 |

|              |           |        |       |
|--------------|-----------|--------|-------|
| A_23_P303548 | C20orf112 | 0.0192 | -1.94 |
| A_32_P32179  | C20orf117 | 0.0269 | 1.57  |
| A_24_P65941  | C21orf96  | 0.0247 | 2.26  |
| A_24_P6083   | C22orf16  | 0.0242 | 1.94  |
| A_23_P415511 | C2orf15   | 0.0366 | 2.23  |
| A_23_P108437 | C2orf31   | 0.0076 | 1.55  |
| A_23_P101407 | C3        | 0.0038 | -1.65 |
| A_23_P319874 | C3orf23   | 0.0330 | -1.84 |
| A_23_P144134 | C3orf58   | 0.0050 | -1.59 |
| A_23_P326963 | C3orf59   | 0.0108 | -1.95 |
| A_24_P363023 | C4orf16   | 0.0174 | -1.53 |
| A_23_P501831 | C5orf4    | 0.0263 | -1.99 |
| A_32_P95757  | C6orf128  | 0.0436 | 1.55  |
| A_32_P208136 | C6orf167  | 0.0292 | -1.87 |
| A_24_P3804   | C6orf26   | 0.0385 | 1.79  |
| A_23_P257057 | C8orf55   | 0.0368 | 1.58  |
| A_24_P100517 | C9orf140  | 0.0136 | 1.75  |
| A_23_P422831 | C9orf61   | 0.0457 | 3.31  |
| A_23_P405873 | C9orf72   | 0.0453 | -1.73 |
| A_23_P8913   | CA2       | 0.0227 | 2.33  |
| A_32_P205722 | CA311162  | 0.0065 | -1.72 |
| A_32_P213103 | CA414006  | 0.0479 | 2.25  |
| A_23_P43197  | CALB1     | 0.0153 | 3.92  |
| A_23_P42882  | CAMK2B    | 0.0422 | 1.83  |
| A_23_P250347 | CAMK4     | 0.0208 | -2.21 |
| A_23_P431933 | CAMKK1    | 0.0009 | 1.61  |
| A_32_P224666 | CAPZA2    | 0.0264 | -1.90 |
| A_32_P34926  | CARD14    | 0.0097 | 2.08  |
| A_23_P207879 | CARD14    | 0.0170 | 2.07  |
| A_23_P320070 | CARD14    | 0.0295 | 1.59  |
| A_23_P38085  | CARHSP1   | 0.0163 | 1.85  |
| A_32_P162716 | CB529149  | 0.0112 | -1.77 |
| A_32_P136800 | CB984746  | 0.0394 | 1.52  |
| A_24_P170593 | CBWD3     | 0.0174 | -1.84 |
| A_24_P370372 | CBX6      | 0.0428 | 1.87  |
| A_23_P55544  | CCBE1     | 0.0076 | -2.09 |
| A_24_P369232 | CCDC3     | 0.0206 | 2.51  |
| A_23_P164958 | CCDC8     | 0.0490 | 1.67  |
| A_23_P48414  | CCNA1     | 0.0224 | -1.67 |
| A_32_P72822  | CCNB2     | 0.0342 | 3.13  |
| A_24_P80532  | CCNG2     | 0.0297 | -2.38 |
| A_23_P331928 | CD109     | 0.0004 | -1.88 |

|              |          |        |       |
|--------------|----------|--------|-------|
| A_23_P393598 | CD276    | 0.0264 | -1.60 |
| A_23_P34597  | CDA      | 0.0337 | -1.53 |
| A_23_P66777  | CDC27    | 0.0270 | -1.59 |
| A_23_P167767 | CDC42SE2 | 0.0457 | -1.77 |
| A_23_P84118  | CDH18    | 0.0134 | 1.56  |
| A_23_P371865 | CDYL2    | 0.0012 | -1.78 |
| A_23_P434118 | CEACAM1  | 0.0304 | -1.82 |
| A_24_P382319 | CEACAM1  | 0.0386 | -2.93 |
| A_24_P224727 | CEBPA    | 0.0056 | 2.37  |
| A_23_P375494 | CEBPA    | 0.0111 | 2.42  |
| A_23_P201570 | CELSR2   | 0.0055 | 1.54  |
| A_24_P182620 | CELSR2   | 0.0087 | 1.72  |
| A_23_P92093  | CELSR3   | 0.0258 | 1.57  |
| A_23_P49816  | CENTA2   | 0.0058 | 3.00  |
| A_24_P373562 | CENTA2   | 0.0067 | 3.46  |
| A_24_P36944  | CEP170   | 0.0036 | -1.70 |
| A_23_P23151  | CEP170   | 0.0162 | -1.53 |
| A_23_P348857 | CEP170   | 0.0217 | -1.62 |
| A_32_P148710 | CFL1     | 0.0427 | -2.17 |
| A_23_P35820  | CFL1     | 0.0466 | -2.11 |
| A_23_P102743 | CGI-09   | 0.0035 | -2.49 |
| A_24_P85317  | CHD2     | 0.0351 | -2.28 |
| A_23_P116123 | CHEK1    | 0.0311 | -2.09 |
| A_23_P382584 | CHGB     | 0.0251 | -2.46 |
| A_23_P6321   | CLDN5    | 0.0425 | -5.58 |
| A_24_P201702 | CLEC2B   | 0.0002 | -2.85 |
| A_23_P53724  | CLSTN3   | 0.0074 | 2.66  |
| A_23_P252671 | CLTB     | 0.0092 | 1.69  |
| A_23_P215913 | CLU      | 0.0115 | 1.70  |
| A_24_P291680 | CNOT6L   | 0.0425 | -1.98 |
| A_23_P211212 | COL18A1  | 0.0156 | 1.66  |
| A_23_P158096 | COL27A1  | 0.0498 | 2.05  |
| A_23_P55749  | COL5A3   | 0.0059 | 2.43  |
| A_23_P69030  | COL8A1   | 0.0379 | 1.85  |
| A_24_P920521 | COMMD6   | 0.0446 | -1.55 |
| A_23_P144257 | COPS8    | 0.0022 | -1.79 |
| A_24_P218151 | CPA4     | 0.0360 | 3.26  |
| A_23_P19754  | CPA4     | 0.0380 | 3.06  |
| A_24_P4170   | CPA6     | 0.0045 | -1.66 |
| A_23_P67198  | CPAMD8   | 0.0217 | 1.98  |
| A_23_P207837 | CPD      | 0.0232 | -1.62 |
| A_32_P122925 | CR594732 | 0.0391 | -1.56 |



|              |               |        |       |
|--------------|---------------|--------|-------|
| A_32_P131633 | CR598849      | 0.0204 | -1.50 |
| A_23_P398372 | CR602592      | 0.0240 | 2.14  |
| A_32_P27991  | CR610181      | 0.0431 | 2.08  |
| A_23_P208293 | CR611629      | 0.0042 | 1.51  |
| A_23_P115064 | CRABP2        | 0.0220 | 2.44  |
| A_23_P394986 | CREG2         | 0.0018 | -2.14 |
| A_24_P278393 | CREM          | 0.0297 | -1.52 |
| A_23_P51105  | CRIM1         | 0.0324 | -1.68 |
| A_23_P74359  | CSRP1         | 0.0428 | -1.55 |
| A_24_P225448 | CSRP1         | 0.0477 | -1.77 |
| A_23_P146946 | CST6          | 0.0151 | 5.48  |
| A_24_P333326 | CTAGE5        | 0.0343 | -2.47 |
| A_24_P287974 | CUEDC1        | 0.0287 | -2.00 |
| A_24_P281908 | CUTL2         | 0.0004 | -2.55 |
| A_32_P29632  | CXADR         | 0.0014 | 2.73  |
| A_23_P57268  | CXADR         | 0.0077 | 2.40  |
| A_24_P374943 | CXADR         | 0.0251 | 1.95  |
| A_24_P183150 | CXCL3         | 0.0125 | -3.23 |
| A_24_P36745  | CXorf38       | 0.0392 | -1.87 |
| A_23_P339582 | CXorf38       | 0.0490 | -1.95 |
| A_23_P30995  | CYB5R4        | 0.0085 | -2.44 |
| A_23_P103486 | CYP2J2        | 0.0287 | 1.74  |
| A_24_P391230 | CYYR1         | 0.0304 | -1.55 |
| A_24_P940499 | D80006        | 0.0282 | -2.57 |
| A_32_P158708 | DB380247      | 0.0149 | -1.62 |
| A_23_P26439  | DBNDD1        | 0.0058 | 2.05  |
| A_23_P28772  | DBNDD2        | 0.0241 | 1.94  |
| A_23_P369994 | DCAMKL1       | 0.0001 | -2.41 |
| A_24_P51061  | DCBLD2        | 0.0330 | -1.81 |
| A_23_P64873  | DCN           | 0.0087 | -7.35 |
| A_23_P313512 | DGP1B         | 0.0042 | -1.51 |
| A_23_P216278 | DDEF1         | 0.0061 | -1.67 |
| A_23_P44831  | DDEF1         | 0.0117 | -1.60 |
| A_23_P71526  | DDEF1         | 0.0362 | -1.82 |
| A_23_P211355 | DGCR8         | 0.0390 | 1.53  |
| A_23_P21644  | DHRS8         | 0.0167 | -1.87 |
| A_23_P93818  | DKFZP434A0131 | 0.0236 | 1.90  |
| A_24_P171043 | DKFZP547L112  | 0.0494 | 3.68  |
| A_32_P198731 | DKFZP761M1511 | 0.0196 | 2.10  |
| A_24_P29686  | DKFZp761I2123 | 0.0020 | 1.79  |
| A_23_P413923 | DMRTA1        | 0.0440 | 1.52  |
| A_23_P327361 | DMXL2         | 0.0194 | -1.62 |

|              |                 |        |       |
|--------------|-----------------|--------|-------|
| A_23_P206140 | DNAJA4          | 0.0334 | 1.62  |
| A_24_P63827  | DNAJB6          | 0.0410 | -1.50 |
| A_23_P127220 | DNAJC12         | 0.0261 | 2.00  |
| A_23_P252052 | DOC1            | 0.0117 | 2.29  |
| A_23_P43988  | DPYD            | 0.0233 | -1.64 |
| A_24_P38347  | DPYSL2          | 0.0033 | -1.80 |
| A_23_P350824 | DPYSL2          | 0.0346 | -1.69 |
| A_23_P38696  | DSC1            | 0.0214 | 3.91  |
| A_23_P109320 | DSCR6           | 0.0173 | 2.10  |
| A_23_P7896   | DUSP22          | 0.0214 | -1.67 |
| A_23_P107750 | EDG8            | 0.0037 | 2.14  |
| A_23_P107744 | EDG8            | 0.0043 | 2.60  |
| A_23_P23443  | EFHD2           | 0.0036 | -3.17 |
| A_23_P428139 | EFNB2           | 0.0301 | -1.54 |
| A_23_P48561  | EFS             | 0.0141 | 2.73  |
| A_24_P754817 | EFTUD1          | 0.0075 | -2.41 |
| A_23_P23171  | EIF2C4          | 0.0040 | -2.39 |
| A_24_P943113 | EIF4E3          | 0.0371 | -1.55 |
| A_24_P383850 | EIF4G3          | 0.0475 | -1.83 |
| A_23_P94571  | ELAVL2          | 0.0228 | -1.63 |
| A_23_P104188 | ELF3            | 0.0279 | 2.47  |
| A_23_P213424 | ENC1            | 0.0198 | 1.67  |
| A_23_P94338  | ENPP2           | 0.0023 | -3.78 |
| A_32_P107746 | ENSA            | 0.0451 | 1.89  |
| A_24_P168574 | ENST00000217126 | 0.0000 | 2.19  |
| A_23_P117912 | ENST00000220507 | 0.0003 | 4.72  |
| A_24_P158718 | ENST00000227451 | 0.0188 | 1.66  |
| A_24_P66398  | ENST00000239730 | 0.0027 | -1.56 |
| A_24_P860797 | ENST00000244221 | 0.0197 | 1.61  |
| A_24_P366082 | ENST00000252134 | 0.0435 | 1.52  |
| A_23_P410859 | ENST00000252744 | 0.0176 | -1.51 |
| A_23_P89062  | ENST00000254109 | 0.0478 | 1.73  |
| A_23_P155185 | ENST00000256031 | 0.0253 | -1.50 |
| A_24_P102080 | ENST00000262646 | 0.0237 | -1.77 |
| A_23_P200043 | ENST00000263739 | 0.0253 | 1.65  |
| A_24_P930926 | ENST00000287322 | 0.0425 | -1.58 |
| A_32_P168342 | ENST00000299289 | 0.0268 | 1.85  |
| A_24_P220984 | ENST00000308269 | 0.0233 | -2.01 |
| A_24_P263803 | ENST00000308819 | 0.0081 | -1.51 |
| A_24_P280897 | ENST00000310822 | 0.0353 | -2.00 |
| A_23_P400794 | ENST00000311630 | 0.0244 | -1.58 |
| A_24_P15586  | ENST00000313516 | 0.0475 | -1.98 |

|              |                 |        |       |
|--------------|-----------------|--------|-------|
| A_24_P66932  | ENST00000313594 | 0.0253 | -1.68 |
| A_24_P170095 | ENST00000316131 | 0.0479 | 1.78  |
| A_24_P341517 | ENST00000317656 | 0.0337 | -1.94 |
| A_24_P349590 | ENST00000318251 | 0.0353 | -2.33 |
| A_24_P323421 | ENST00000320831 | 0.0136 | -2.25 |
| A_24_P44453  | ENST00000322839 | 0.0417 | 1.70  |
| A_24_P345290 | ENST00000327299 | 0.0072 | -1.56 |
| A_32_P117127 | ENST00000330336 | 0.0148 | 1.59  |
| A_32_P65473  | ENST00000330640 | 0.0137 | 1.60  |
| A_32_P20573  | ENST00000334464 | 0.0460 | -1.83 |
| A_24_P101541 | ENST00000339991 | 0.0098 | -1.99 |
| A_24_P910262 | ENST00000354586 | 0.0081 | -1.99 |
| A_23_P394246 | ENST00000356987 | 0.0179 | 2.38  |
| A_24_P923629 | ENST00000357137 | 0.0121 | -1.82 |
| A_23_P208870 | ENST00000358335 | 0.0169 | 1.76  |
| A_24_P359267 | ENST00000358335 | 0.0182 | 1.70  |
| A_32_P64461  | ENST00000360548 | 0.0441 | -1.50 |
| A_23_P409626 | ENST00000360796 | 0.0357 | -1.83 |
| A_23_P406928 | ENST00000361567 | 0.0178 | 1.70  |
| A_24_P702813 | ENST00000367590 | 0.0018 | -1.69 |
| A_32_P197870 | ENST00000368847 | 0.0440 | 2.18  |
| A_24_P687594 | ENST00000369308 | 0.0396 | -2.19 |
| A_24_P673968 | ENST00000371276 | 0.0278 | 1.59  |
| A_32_P59302  | ENST00000372583 | 0.0266 | 2.21  |
| A_24_P123658 | ENST00000372871 | 0.0429 | 1.67  |
| A_24_P396489 | ENST00000375590 | 0.0065 | -1.65 |
| A_24_P673786 | ENST00000376573 | 0.0066 | -1.84 |
| A_24_P649624 | ENST00000377093 | 0.0063 | -1.65 |
| A_23_P324011 | ENST00000377538 | 0.0432 | 1.52  |
| A_32_P140656 | ENST00000381298 | 0.0008 | -1.50 |
| A_24_P269624 | ENST00000381854 | 0.0092 | -1.54 |
| A_24_P358146 | ENST00000382990 | 0.0044 | -1.78 |
| A_23_P93739  | EPDR1           | 0.0016 | -1.52 |
| A_24_P166613 | EPDR1           | 0.0400 | -4.29 |
| A_23_P200067 | EPHB2           | 0.0132 | 1.75  |
| A_23_P8834   | EPHX2           | 0.0323 | 2.29  |
| A_23_P136347 | EPS8            | 0.0047 | -1.69 |
| A_23_P333227 | ERGIC1          | 0.0318 | -1.62 |
| A_24_P407311 | ERO1L           | 0.0115 | -2.55 |
| A_23_P106145 | ERO1L           | 0.0123 | -2.11 |
| A_23_P9836   | ETV5            | 0.0418 | -1.68 |
| A_24_P256830 | EXOC5           | 0.0123 | -1.58 |

|              |          |        |       |
|--------------|----------|--------|-------|
| A_24_P224219 | EXOC5    | 0.0173 | -1.52 |
| A_24_P392265 | EXOC5    | 0.0174 | -1.51 |
| A_23_P14464  | EXOC5    | 0.0420 | -1.54 |
| A_32_P58280  | EXOC6    | 0.0461 | -1.73 |
| A_23_P500421 | EYA2     | 0.0105 | 2.20  |
| A_23_P64404  | FADS3    | 0.0183 | 1.62  |
| A_23_P415061 | FAM104B  | 0.0413 | -1.79 |
| A_23_P320878 | FAM119B  | 0.0425 | -1.75 |
| A_23_P157365 | FAM3C    | 0.0377 | -2.00 |
| A_24_P370042 | FAM59A   | 0.0108 | -1.76 |
| A_23_P343963 | FAM83F   | 0.0186 | -1.68 |
| A_23_P356101 | FBXO11   | 0.0077 | -1.52 |
| A_24_P357536 | FBXO11   | 0.0216 | -1.72 |
| A_24_P106522 | FBXO9    | 0.0272 | 1.63  |
| A_23_P212800 | FGF5     | 0.0168 | -1.69 |
| A_23_P105803 | FGF9     | 0.0235 | -1.57 |
| A_23_P79622  | FKBP7    | 0.0259 | -1.71 |
| A_23_P38894  | FLJ11286 | 0.0246 | 1.56  |
| A_23_P25060  | FLJ13769 | 0.0281 | 1.93  |
| A_32_P148745 | FLJ14712 | 0.0279 | 2.72  |
| A_23_P147109 | FLJ20245 | 0.0118 | -2.55 |
| A_23_P147106 | FLJ20245 | 0.0229 | -2.16 |
| A_23_P21485  | FLJ20701 | 0.0202 | -1.91 |
| A_23_P152583 | FLJ21865 | 0.0251 | 1.51  |
| A_24_P838448 | FLJ22536 | 0.0107 | 1.81  |
| A_23_P83835  | FLJ23356 | 0.0128 | -1.59 |
| A_23_P149798 | FLJ23556 | 0.0283 | 1.73  |
| A_23_P350005 | FLJ25801 | 0.0088 | -1.67 |
| A_24_P677642 | FLJ31813 | 0.0304 | -1.55 |
| A_23_P370569 | FLJ32549 | 0.0123 | -1.54 |
| A_24_P59471  | FLJ36840 | 0.0413 | 2.49  |
| A_23_P253677 | FLJ38482 | 0.0188 | -1.60 |
| A_24_P20524  | FLJ38482 | 0.0212 | -1.50 |
| A_23_P163467 | FLJ43339 | 0.0325 | 2.00  |
| A_23_P55319  | FLOT2    | 0.0054 | 1.79  |
| A_24_P40417  | FMR1     | 0.0140 | -1.98 |
| A_23_P25503  | FNDC3A   | 0.0484 | -1.74 |
| A_23_P38795  | FPR1     | 0.0026 | -2.71 |
| A_24_P374741 | FRMD4A   | 0.0085 | 2.08  |
| A_23_P22352  | FRMD4A   | 0.0259 | 2.34  |
| A_23_P25888  | FRMD6    | 0.0336 | -1.64 |
| A_23_P353125 | FSIP1    | 0.0233 | -1.92 |

|              |          |        |       |
|--------------|----------|--------|-------|
| A_23_P141362 | FZD2     | 0.0168 | 1.65  |
| A_23_P397999 | FZD5     | 0.0014 | 1.54  |
| A_24_P380132 | G3BP2    | 0.0105 | -1.54 |
| A_23_P19102  | GALNT10  | 0.0002 | 3.23  |
| A_23_P7706   | GALNT10  | 0.0356 | 1.62  |
| A_24_P910923 | GALNT10  | 0.0356 | 1.70  |
| A_23_P304450 | GATA6    | 0.0274 | -1.66 |
| A_23_P28485  | GCA      | 0.0113 | 1.83  |
| A_23_P9232   | GCNT1    | 0.0004 | -3.15 |
| A_24_P393571 | GDA      | 0.0027 | -9.77 |
| A_23_P26511  | GDPD3    | 0.0038 | 1.75  |
| A_23_P134910 | GGH      | 0.0269 | -1.73 |
| A_23_P93591  | GJA1     | 0.0062 | -2.09 |
| A_23_P96556  | GK       | 0.0188 | -1.62 |
| A_23_P337141 | GLI4     | 0.0417 | 1.56  |
| A_23_P316612 | GLIS1    | 0.0067 | -3.06 |
| A_24_P277657 | GMPR     | 0.0265 | 1.84  |
| A_24_P353912 | GNAI3    | 0.0104 | -1.78 |
| A_23_P69918  | GNL3L    | 0.0325 | 1.82  |
| A_23_P104237 | GPAM     | 0.0074 | -2.22 |
| A_23_P119812 | GPD2     | 0.0037 | -1.70 |
| A_32_P220152 | GPIAP1   | 0.0213 | -1.76 |
| A_23_P154150 | GPR1     | 0.0120 | -1.59 |
| A_24_P942945 | GPR126   | 0.0200 | -1.51 |
| A_23_P15692  | GPR172B  | 0.0257 | 1.70  |
| A_23_P253692 | GPR64    | 0.0067 | -7.48 |
| A_23_P1056   | GPR89A   | 0.0187 | -1.59 |
| A_24_P887553 | GPR89A   | 0.0253 | -1.86 |
| A_23_P112103 | GSDMDC1  | 0.0415 | 2.01  |
| A_23_P94118  | GTF2E2   | 0.0239 | -1.52 |
| A_23_P104617 | GYLTL1B  | 0.0014 | 1.77  |
| A_24_P353964 | HADHA    | 0.0402 | -1.68 |
| A_32_P25253  | HBLD2    | 0.0359 | -1.59 |
| A_24_P387609 | HBLD2    | 0.0401 | -1.64 |
| A_24_P75543  | HBLD2    | 0.0412 | -1.81 |
| A_32_P85500  | HCP5     | 0.0036 | 1.70  |
| A_24_P205137 | HDAC6    | 0.0085 | -1.54 |
| A_23_P22526  | HEPH     | 0.0064 | 3.14  |
| A_23_P304716 | HES2     | 0.0229 | 1.54  |
| A_23_P300174 | HEXDC    | 0.0055 | 1.53  |
| A_24_P9321   | HIST1H3I | 0.0215 | -1.57 |
| A_24_P85099  | HMGA2    | 0.0183 | -1.82 |

|              |         |        |        |
|--------------|---------|--------|--------|
| A_23_P256107 | HPSE    | 0.0294 | -1.73  |
| A_23_P116414 | HRASLS3 | 0.0085 | 1.69   |
| A_23_P200109 | HS2ST1  | 0.0351 | -1.60  |
| A_23_P118158 | HS3ST2  | 0.0110 | -3.72  |
| A_23_P14986  | HSD11B2 | 0.0440 | 2.04   |
| A_23_P118065 | HSD17B2 | 0.0282 | -12.23 |
| A_23_P204967 | HSMPP8  | 0.0116 | 5.61   |
| A_24_P287403 | HSMPP8  | 0.0145 | 5.60   |
| A_23_P500381 | HTR7    | 0.0334 | -1.62  |
| A_23_P156977 | HUS1    | 0.0400 | -1.53  |
| A_23_P344988 | ICK     | 0.0430 | -1.73  |
| A_23_P143143 | ID2     | 0.0490 | -2.08  |
| A_23_P137381 | ID3     | 0.0024 | 1.82   |
| A_23_P153745 | IFI30   | 0.0048 | 1.54   |
| A_23_P23074  | IFI44   | 0.0320 | 2.63   |
| A_23_P201459 | IFI6    | 0.0475 | 3.48   |
| A_23_P72737  | IFITM1  | 0.0001 | 4.44   |
| A_23_P119943 | IGFBP2  | 0.0325 | 1.84   |
| A_23_P139912 | IGFBP6  | 0.0004 | -1.59  |
| A_23_P138680 | IL15RA  | 0.0043 | 2.07   |
| A_23_P329152 | ILF3    | 0.0042 | 1.58   |
| A_24_P101200 | IMPAD1  | 0.0057 | -2.29  |
| A_23_P383532 | IMPAD1  | 0.0371 | -1.73  |
| A_24_P240732 | IMPAD1  | 0.0461 | -1.98  |
| A_32_P120638 | INTS4   | 0.0184 | -1.67  |
| A_23_P19852  | IQCE    | 0.0356 | 2.01   |
| A_23_P162300 | IRAK3   | 0.0033 | -2.75  |
| A_24_P243329 | ITGA2   | 0.0390 | -2.14  |
| A_23_P36562  | ITGA5   | 0.0242 | -1.84  |
| A_23_P381992 | ITGAV   | 0.0028 | -1.99  |
| A_24_P598836 | ITGB1   | 0.0062 | -1.70  |
| A_23_P104199 | ITGB1   | 0.0114 | -2.12  |
| A_23_P104193 | ITGB1   | 0.0120 | -1.62  |
| A_23_P329573 | ITGB2   | 0.0059 | -3.00  |
| A_23_P65918  | ITPKA   | 0.0080 | -1.97  |
| A_23_P54055  | JUB     | 0.0311 | 1.54   |
| A_24_P924484 | K03200  | 0.0002 | -2.29  |
| A_23_P86100  | KARCA1  | 0.0359 | 2.12   |
| A_32_P75284  | KATNAL1 | 0.0397 | -1.53  |
| A_24_P31627  | KCNB1   | 0.0306 | -3.01  |
| A_23_P210581 | KCNG1   | 0.0306 | 1.95   |
| A_32_P181222 | KCNMA1  | 0.0055 | -2.61  |

|              |           |        |       |
|--------------|-----------|--------|-------|
| A_32_P160693 | KCTD2     | 0.0240 | -1.85 |
| A_24_P82135  | KIAA0256  | 0.0041 | -2.56 |
| A_32_P355396 | KIAA0329  | 0.0227 | 1.81  |
| A_23_P406025 | KIAA0367  | 0.0006 | -5.09 |
| A_24_P320727 | KIAA1324L | 0.0218 | -1.89 |
| A_24_P350124 | KIAA1618  | 0.0469 | 1.62  |
| A_24_P130959 | KIAA1804  | 0.0010 | -1.66 |
| A_24_P130952 | KIAA1804  | 0.0224 | -1.52 |
| A_23_P43597  | KIF24     | 0.0287 | 2.19  |
| A_24_P93948  | KIF5A     | 0.0006 | 2.20  |
| A_24_P17719  | KLHL5     | 0.0179 | -1.85 |
| A_23_P121527 | KLHL5     | 0.0194 | -1.90 |
| A_24_P17710  | KLHL5     | 0.0241 | -2.23 |
| A_23_P101505 | KLK11     | 0.0058 | 3.07  |
| A_23_P4856   | KLK15     | 0.0033 | 1.71  |
| A_23_P369343 | KLK8      | 0.0270 | 1.86  |
| A_24_P102539 | KRIT1     | 0.0242 | -1.62 |
| A_23_P101054 | KRT34     | 0.0240 | -2.13 |
| A_23_P116942 | LAG3      | 0.0333 | 1.92  |
| A_32_P81334  | LARP4     | 0.0189 | -1.56 |
| A_23_P69179  | LEPREL1   | 0.0061 | -1.55 |
| A_23_P15357  | LGALS3BP  | 0.0092 | 1.66  |
| A_24_P940979 | LGALS8    | 0.0110 | -1.64 |
| A_32_P452655 | LGALS9    | 0.0228 | 2.69  |
| A_24_P397386 | LIFR      | 0.0376 | -1.68 |
| A_23_P139277 | LIN7C     | 0.0046 | -1.87 |
| A_23_P327698 | LMBRD2    | 0.0223 | -1.55 |
| A_32_P113935 | LNX2      | 0.0307 | -1.53 |
| A_24_P841622 | LOC132241 | 0.0395 | 1.58  |
| A_24_P273647 | LOC146439 | 0.0401 | 2.88  |
| A_23_P55846  | LOC147804 | 0.0386 | -2.29 |
| A_24_P57170  | LOC148137 | 0.0054 | 1.62  |
| A_24_P203964 | LOC153561 | 0.0419 | 1.76  |
| A_24_P358245 | LOC158381 | 0.0156 | -1.78 |
| A_32_P72553  | LOC162073 | 0.0434 | 2.20  |
| A_23_P392126 | LOC201229 | 0.0403 | 1.96  |
| A_32_P154911 | LOC222171 | 0.0486 | -2.58 |
| A_32_P122323 | LOC285749 | 0.0021 | 2.19  |
| A_32_P151366 | LOC285813 | 0.0253 | 1.66  |
| A_32_P13370  | LOC286161 | 0.0331 | 1.52  |
| A_24_P135579 | LOC344382 | 0.0450 | -1.91 |
| A_23_P138885 | LOC387758 | 0.0142 | 1.93  |

|              |           |        |        |       |
|--------------|-----------|--------|--------|-------|
| A_32_P76992  | LOC388114 | 0.0032 | 1.64   |       |
| A_24_P734953 | LOC388610 | 0.0238 | 1.61   |       |
| A_24_P75979  | LOC402643 | 0.0216 | -2.45  |       |
| A_24_P93703  | LOC440104 | 0.0281 | 1.66   |       |
| A_32_P170749 | LOC442578 | 0.0390 | 1.75   |       |
| A_23_P149441 | LOC51152  | 0.0111 | 1.88   |       |
| A_24_P825942 | LOC541471 | 0.0332 | -2.14  |       |
| A_23_P349463 | LOC63928  | 0.0039 | 3.54   |       |
| A_24_P915710 | LOC63929  | 0.0053 | -2.12  |       |
| A_24_P272352 | LOC649125 | 0.0259 | -1.55  |       |
| A_32_P146898 | LOC653188 | 0.0208 | 1.89   |       |
| A_23_P168592 | LOC90693  | 0.0022 | -1.59  |       |
| A_23_P168587 | LOC90693  | 0.0420 | -1.62  |       |
| A_23_P111995 | LOXL2     | 0.0078 | -1.65  |       |
| A_23_P151791 | LTB4R     | 0.0002 | 1.99   |       |
| A_23_P134764 | LY6D      | 0.0380 | 1.61   |       |
| A_24_P48495  | LYPD3     | 0.0131 | 1.87   |       |
| A_23_P39265  | LYPD3     | 0.0387 | 1.94   |       |
| A_23_P397376 | MAF       | 0.0235 | 4.51   |       |
| A_23_P99996  | MAGEL2    | 0.0467 | -2.26  |       |
| A_23_P103601 | MAN1C1    | 0.0276 | 1.51   |       |
| A_24_P187921 | MANEA     | 0.0359 | -1.75  |       |
| A_24_P123385 | MAP1B     | 0.0216 | -1.98  |       |
| A_23_P102192 | MAP4K4    | 0.0044 | -1.69  |       |
| A_23_P321511 |           | 03-Mar | 0.0070 | -2.77 |
| A_23_P201988 | MASTL     | 0.0367 | -1.70  |       |
| A_23_P81408  | MAT2B     | 0.0199 | -1.69  |       |
| A_23_P71328  | MATN2     | 0.0262 | 1.90   |       |
| A_23_P142537 | MBD5      | 0.0256 | -2.34  |       |
| A_23_P14946  | MBTPS1    | 0.0008 | -1.73  |       |
| A_23_P14948  | MBTPS1    | 0.0029 | -1.84  |       |
| A_24_P378368 | MBTPS1    | 0.0042 | -2.11  |       |
| A_23_P329271 | MC1R      | 0.0391 | 1.70   |       |
| A_24_P103060 | MCFD2     | 0.0144 | -2.33  |       |
| A_24_P319635 | MCL1      | 0.0250 | -1.55  |       |
| A_32_P120567 | MDFIC     | 0.0155 | -1.73  |       |
| A_24_P926960 | MEGF6     | 0.0109 | 2.02   |       |
| A_23_P77223  | MESP1     | 0.0122 | 1.93   |       |
| A_24_P339201 | METRN     | 0.0011 | 2.19   |       |
| A_23_P208069 | METTTL4   | 0.0230 | -1.58  |       |
| A_24_P202139 | METTTL9   | 0.0085 | -1.65  |       |
| A_23_P386320 | MFI2      | 0.0009 | -2.76  |       |



|              |          |        |       |
|--------------|----------|--------|-------|
| A_23_P103104 | MFNG     | 0.0031 | 2.09  |
| A_24_P224926 | MFNG     | 0.0074 | 2.11  |
| A_23_P16806  | MGC10701 | 0.0193 | 1.62  |
| A_23_P143102 | MGC10955 | 0.0409 | -2.15 |
| A_24_P104649 | MGC15523 | 0.0471 | 1.66  |
| A_23_P328621 | MGC20470 | 0.0374 | 1.78  |
| A_23_P66719  | MGC23280 | 0.0158 | 1.53  |
| A_23_P256051 | MGC70863 | 0.0289 | -1.67 |
| A_23_P403195 | MICAL3   | 0.0341 | 1.55  |
| A_23_P154400 | MLPH     | 0.0040 | -3.40 |
| A_23_P165783 | MLPH     | 0.0096 | -3.35 |
| A_23_P165778 | MLPH     | 0.0164 | -3.03 |
| A_24_P260101 | MME      | 0.0353 | -1.72 |
| A_23_P108922 | MOBK1B   | 0.0164 | -1.99 |
| A_24_P333445 | MORF4L2  | 0.0136 | -1.65 |
| A_23_P200685 | MOSC2    | 0.0313 | 1.98  |
| A_24_P126093 | MOSPD2   | 0.0339 | -2.07 |
| A_24_P345123 | MPZL1    | 0.0104 | -1.64 |
| A_23_P144453 | MRFAP1   | 0.0159 | -1.58 |
| A_24_P212389 | MSRB3    | 0.0227 | -1.68 |
| A_23_P206998 | MTMR4    | 0.0070 | -2.63 |
| A_24_P382119 | MTMR4    | 0.0119 | -1.59 |
| A_23_P25515  | MTMR6    | 0.0154 | -1.69 |
| A_24_P261052 | MTMR9    | 0.0104 | -1.52 |
| A_24_P77870  | MUTED    | 0.0469 | -1.83 |
| A_23_P17663  | MX1      | 0.0044 | 2.56  |
| A_23_P124559 | MXD3     | 0.0265 | 1.55  |
| A_24_P256764 | MYH10    | 0.0177 | -1.80 |
| A_23_P26865  | MYH3     | 0.0373 | 1.64  |
| A_24_P917123 | MYLIP    | 0.0481 | 2.52  |
| A_32_P217471 | MYO1B    | 0.0003 | -1.66 |
| A_24_P7143   | MYO1B    | 0.0014 | -1.69 |
| A_23_P432610 | N4BP1    | 0.0142 | 1.72  |
| A_23_P58747  | N4BP3    | 0.0434 | 1.88  |
| A_24_P221770 | NAT12    | 0.0493 | -1.56 |
| A_23_P52727  | NAV2     | 0.0467 | 1.92  |
| A_23_P409168 | NBEAL2   | 0.0099 | 1.65  |
| A_23_P86424  | NCOA4    | 0.0259 | -1.51 |
| A_23_P86421  | NCOA4    | 0.0362 | -1.53 |
| A_24_P237661 | NCOR1    | 0.0235 | -1.65 |
| A_23_P37205  | NDRG2    | 0.0286 | 2.11  |
| A_24_P936444 | NFE2L2   | 0.0020 | -1.61 |

|              |         |        |       |
|--------------|---------|--------|-------|
| A_24_P49731  | NFYB    | 0.0378 | -1.64 |
| A_24_P338971 | NIPA2   | 0.0343 | -1.75 |
| A_24_P399606 | NOTCH3  | 0.0469 | 1.60  |
| A_23_P254353 | NOXA1   | 0.0160 | 2.79  |
| A_23_P140256 | NP      | 0.0012 | -2.42 |
| A_24_P252364 | NRCAM   | 0.0189 | -1.92 |
| A_23_P59418  | NRF1    | 0.0152 | -1.50 |
| A_23_P86390  | NRP1    | 0.0201 | -1.75 |
| A_24_P50801  | NRP2    | 0.0404 | -1.72 |
| A_23_P209669 | NRP2    | 0.0419 | -1.94 |
| A_24_P218056 | NUDCD3  | 0.0162 | -1.71 |
| A_32_P117723 | NUDT4   | 0.0228 | -1.60 |
| A_24_P200761 | NUP43   | 0.0499 | -1.52 |
| A_23_P63128  | OBSCN   | 0.0320 | 1.68  |
| A_23_P335695 | OBSL1   | 0.0007 | 2.70  |
| A_24_P220485 | OLFML2A | 0.0472 | 2.44  |
| A_24_P11315  | OLFML3  | 0.0342 | -2.89 |
| A_32_P24832  | OLFML3  | 0.0462 | -1.75 |
| A_23_P74391  | OPN3    | 0.0102 | -1.65 |
| A_24_P153511 | OSBPL8  | 0.0383 | -1.74 |
| A_23_P81522  | OSRF    | 0.0149 | -2.08 |
| A_24_P124875 | OTUB2   | 0.0173 | -1.52 |
| A_23_P212974 | OTUD4   | 0.0096 | -1.88 |
| A_23_P69637  | OTUD4   | 0.0373 | -2.41 |
| A_23_P25069  | OVOS2   | 0.0339 | 1.79  |
| A_23_P64611  | P2RY6   | 0.0139 | 2.71  |
| A_24_P152398 | P53AIP1 | 0.0402 | 1.87  |
| A_23_P51718  | PABPC4  | 0.0051 | -1.56 |
| A_23_P337875 | PAQR3   | 0.0184 | -2.17 |
| A_23_P343837 | PARP11  | 0.0027 | -2.46 |
| A_23_P305060 | PBEF1   | 0.0163 | -1.62 |
| A_24_P408772 | PBEF1   | 0.0251 | -2.30 |
| A_32_P79396  | PBEF1   | 0.0266 | -1.90 |
| A_23_P41128  | PCAF    | 0.0395 | -2.45 |
| A_24_P360206 | PCDHA11 | 0.0104 | -2.83 |
| A_23_P218942 | PCDHAC2 | 0.0345 | -3.45 |
| A_32_P142440 | PCSK9   | 0.0250 | -5.99 |
| A_23_P33376  | PCTK2   | 0.0490 | -1.80 |
| A_23_P56640  | PCYOX1  | 0.0308 | -1.52 |
| A_23_P151198 | PDAP1   | 0.0157 | 2.24  |
| A_23_P123256 | PDAP1   | 0.0366 | 1.72  |
| A_23_P68730  | PDXK    | 0.0037 | 1.53  |

|              |         |        |       |
|--------------|---------|--------|-------|
| A_23_P7402   | PDZD2   | 0.0143 | -2.61 |
| A_24_P79403  | PF4     | 0.0278 | -1.81 |
| A_23_P113311 | PH-4    | 0.0070 | 1.84  |
| A_23_P113317 | PH-4    | 0.0083 | 1.76  |
| A_23_P217399 | PIGA    | 0.0449 | -2.35 |
| A_32_P167148 | PIGW    | 0.0465 | -1.63 |
| A_23_P84189  | PITPNC1 | 0.0459 | -2.00 |
| A_23_P58642  | PITX1   | 0.0496 | 1.71  |
| A_24_P133288 | PKP2    | 0.0262 | -1.63 |
| A_23_P162466 | PKP2    | 0.0361 | -1.74 |
| A_24_P379616 | PLB1    | 0.0415 | 2.03  |
| A_23_P205801 | PLDN    | 0.0011 | -2.24 |
| A_23_P205808 | PLDN    | 0.0019 | -1.92 |
| A_24_P27373  | PLDN    | 0.0043 | -1.74 |
| A_23_P406889 | PLDN    | 0.0116 | -2.01 |
| A_24_P13041  | PLEKHK1 | 0.0074 | 2.54  |
| A_23_P100711 | PMP22   | 0.0015 | -2.67 |
| A_23_P215060 | PODXL   | 0.0360 | 2.11  |
| A_23_P159764 | POF1B   | 0.0399 | 2.04  |
| A_23_P215431 | POM121  | 0.0044 | 1.51  |
| A_23_P11071  | PORCN   | 0.0447 | -1.54 |
| A_23_P59138  | POU5F1  | 0.0017 | 1.68  |
| A_23_P425704 | PPARBP  | 0.0185 | 1.52  |
| A_23_P150807 | PPFIBP2 | 0.0003 | 2.13  |
| A_23_P409623 | PPFIBP2 | 0.0023 | 1.89  |
| A_23_P409553 | PPM1A   | 0.0019 | -2.20 |
| A_24_P183375 | PPP2CA  | 0.0308 | -1.59 |
| A_23_P213620 | PPP2R2B | 0.0069 | 3.98  |
| A_24_P3415   | PPP2R2C | 0.0027 | -2.97 |
| A_23_P108592 | PPP3R1  | 0.0001 | -2.32 |
| A_23_P331908 | PRDM11  | 0.0441 | 1.74  |
| A_23_P314760 | PRKAG2  | 0.0050 | -1.66 |
| A_23_P44366  | PRKAG2  | 0.0299 | -1.52 |
| A_24_P356592 | PRKAR1A | 0.0464 | -1.90 |
| A_23_P106016 | PRKD1   | 0.0102 | -1.89 |
| A_23_P139740 | PRMT8   | 0.0017 | -2.46 |
| A_24_P119141 | PROS1   | 0.0017 | 2.14  |
| A_23_P73114  | PROS1   | 0.0047 | 2.12  |
| A_23_P60537  | PRPF4   | 0.0012 | -1.57 |
| A_23_P129602 | PRSS21  | 0.0148 | -2.45 |
| A_24_P937405 | PRSS23  | 0.0284 | 1.60  |
| A_24_P263623 | PTGES3  | 0.0345 | -1.78 |

|              |         |        |       |
|--------------|---------|--------|-------|
| A_23_P216966 | PTGS1   | 0.0387 | -1.63 |
| A_24_P178273 | PTK9    | 0.0016 | -1.61 |
| A_23_P99920  | PTPLAD1 | 0.0499 | -1.69 |
| A_23_P338890 | PTPN1   | 0.0271 | -1.75 |
| A_23_P101642 | PTPRH   | 0.0152 | -3.18 |
| A_23_P141376 | PTRF    | 0.0293 | 1.58  |
| A_23_P80759  | PVRL3   | 0.0075 | -1.72 |
| A_23_P80763  | PVRL3   | 0.0197 | -1.58 |
| A_24_P941322 | QKI     | 0.0020 | -2.03 |
| A_24_P96234  | QTRT1   | 0.0262 | 1.68  |
| A_23_P165879 | RAB10   | 0.0223 | -1.70 |
| A_24_P193295 | RAB15   | 0.0109 | 1.97  |
| A_32_P179258 | RAB22A  | 0.0119 | -1.64 |
| A_23_P115091 | RAB25   | 0.0461 | 1.68  |
| A_32_P7204   | RAB28   | 0.0268 | -2.22 |
| A_23_P125147 | RAB28   | 0.0340 | -2.02 |
| A_23_P6447   | RABL4   | 0.0064 | 1.84  |
| A_23_P40952  | RAF1    | 0.0021 | -1.53 |
| A_23_P92727  | RAI14   | 0.0098 | -2.28 |
| A_23_P50946  | RAMP1   | 0.0179 | 1.78  |
| A_23_P2661   | RAP1B   | 0.0158 | -1.51 |
| A_23_P1962   | RARRES3 | 0.0129 | 1.77  |
| A_23_P119353 | RASIP1  | 0.0415 | 1.78  |
| A_24_P407224 | RASSF8  | 0.0001 | -1.72 |
| A_24_P913561 | RASSF8  | 0.0017 | -2.21 |
| A_23_P116712 | RASSF8  | 0.0035 | -1.75 |
| A_24_P404807 | RBM41   | 0.0055 | -1.52 |
| A_23_P103099 | RBM9    | 0.0076 | -1.89 |
| A_23_P257649 | RBP1    | 0.0066 | 1.56  |
| A_23_P257457 | RDHE2   | 0.0246 | -3.83 |
| A_23_P141447 | RDM1    | 0.0297 | 2.08  |
| A_23_P25215  | RECQL   | 0.0338 | -1.64 |
| A_23_P19182  | REEP2   | 0.0074 | 1.65  |
| A_23_P330209 | RFFL    | 0.0028 | -1.57 |
| A_23_P320578 | RGS16   | 0.0393 | 1.64  |
| A_23_P20427  | RHOBTB2 | 0.0431 | 2.09  |
| A_23_P424561 | RHOV    | 0.0002 | 4.65  |
| A_23_P315386 | RHPN1   | 0.0049 | 2.43  |
| A_23_P161686 | RICS    | 0.0160 | 1.59  |
| A_24_P34476  | RIF1    | 0.0340 | -1.53 |
| A_24_P360269 | RNASET2 | 0.0065 | 1.51  |
| A_32_P131367 | RNF13   | 0.0498 | -1.65 |

|              |               |        |       |
|--------------|---------------|--------|-------|
| A_23_P416112 | RNF168        | 0.0116 | -1.55 |
| A_23_P130429 | ROCK1         | 0.0050 | -1.79 |
| A_23_P70278  | ROS1          | 0.0236 | -2.58 |
| A_23_P128574 | RP11-301I17.1 | 0.0011 | -3.40 |
| A_24_P602871 | RP5-875H10.1  | 0.0326 | 3.16  |
| A_23_P108932 | RPL23AP13     | 0.0422 | 1.77  |
| A_24_P307025 | RPL23AP7      | 0.0377 | -1.68 |
| A_23_P335920 | RPS6KA2       | 0.0257 | -1.82 |
| A_24_P237601 | RPS6KA5       | 0.0001 | -2.44 |
| A_24_P304636 | RPS6KA5       | 0.0014 | -2.06 |
| A_24_P590560 | RRN3          | 0.0087 | -1.86 |
| A_23_P206877 | RRN3          | 0.0257 | -1.59 |
| A_24_P296347 | RRN3          | 0.0347 | -1.59 |
| A_32_P161762 | RUNX2         | 0.0052 | -2.29 |
| A_23_P23048  | S100A9        | 0.0001 | -2.31 |
| A_23_P48585  | SALL2         | 0.0258 | 1.74  |
| A_23_P29005  | SAMSN1        | 0.0322 | -6.58 |
| A_32_P37592  | SCARNA17      | 0.0053 | 2.29  |
| A_24_P385134 | SCD5          | 0.0002 | 1.64  |
| A_23_P212475 | SCOTIN        | 0.0003 | -1.97 |
| A_24_P394246 | SCOTIN        | 0.0211 | -2.28 |
| A_23_P93722  | SDK1          | 0.0034 | 2.07  |
| A_32_P29118  | SEMA3D        | 0.0126 | 2.20  |
| A_23_P95165  | SEMA4B        | 0.0011 | -1.55 |
| A_23_P121374 | SEMA5B        | 0.0023 | -1.68 |
| A_23_P119015 | SERPINB13     | 0.0259 | 1.61  |
| A_24_P250614 | SF3A1         | 0.0473 | -1.64 |
| A_23_P254254 | SGSH          | 0.0104 | 1.86  |
| A_23_P61688  | SLC12A7       | 0.0293 | 1.74  |
| A_24_P179467 | SLC1A6        | 0.0326 | 2.18  |
| A_24_P103004 | SLC20A1       | 0.0314 | -1.77 |
| A_23_P125078 | SLC26A11      | 0.0010 | 2.86  |
| A_23_P140450 | SLC27A2       | 0.0031 | 3.03  |
| A_23_P41789  | SLC27A6       | 0.0027 | 5.04  |
| A_23_P22915  | SLC30A7       | 0.0040 | -1.62 |
| A_23_P217109 | SLC31A2       | 0.0187 | -1.52 |
| A_23_P17695  | SLC37A1       | 0.0435 | 1.79  |
| A_23_P23575  | SLC39A1       | 0.0009 | -1.74 |
| A_23_P342641 | SLC44A5       | 0.0011 | -1.53 |
| A_24_P109838 | SLC6A15       | 0.0114 | -1.95 |
| A_23_P13725  | SLC6A15       | 0.0221 | -1.67 |
| A_23_P135990 | SLCO2A1       | 0.0308 | -4.22 |

|              |         |        |       |
|--------------|---------|--------|-------|
| A_23_P144348 | SLIT2   | 0.0016 | 5.59  |
| A_24_P942773 | SLMAP   | 0.0372 | -1.61 |
| A_32_P109002 | SMAD2   | 0.0027 | -1.69 |
| A_24_P150466 | SMOC1   | 0.0343 | 1.61  |
| A_23_P160881 | SMPDL3B | 0.0209 | 1.70  |
| A_24_P937139 | SNAI2   | 0.0173 | -2.49 |
| A_23_P23175  | SNIP1   | 0.0042 | -2.80 |
| A_24_P936688 | SNRK    | 0.0127 | -2.47 |
| A_24_P375421 | SNX22   | 0.0000 | -2.26 |
| A_24_P179044 | SNX9    | 0.0167 | -1.65 |
| A_24_P216654 | SOAT1   | 0.0032 | -1.98 |
| A_23_P63319  | SOAT1   | 0.0139 | -2.26 |
| A_24_P48014  | SOCS1   | 0.0103 | -1.58 |
| A_23_P5813   | SOCS5   | 0.0215 | -1.66 |
| A_23_P121665 | SORCS2  | 0.0482 | 2.05  |
| A_24_P325520 | SORT1   | 0.0012 | 1.73  |
| A_23_P209712 | SP100   | 0.0364 | 1.55  |
| A_23_P146066 | SPAG1   | 0.0246 | -2.14 |
| A_32_P219660 | SPANXA1 | 0.0018 | -2.28 |
| A_23_P209356 | SPAST   | 0.0063 | -1.56 |
| A_24_P941988 | SPAST   | 0.0219 | -2.32 |
| A_23_P52219  | SPFH1   | 0.0169 | -1.93 |
| A_23_P433990 | SPG7    | 0.0311 | -1.71 |
| A_23_P74012  | SPRR1A  | 0.0389 | 2.48  |
| A_24_P337657 | SRF     | 0.0195 | -1.61 |
| A_23_P162449 | SRGAP1  | 0.0399 | 1.69  |
| A_24_P922261 | SRGAP1  | 0.0409 | 2.46  |
| A_23_P74269  | SRM     | 0.0057 | -2.00 |
| A_23_P96383  | SRPX    | 0.0019 | -1.66 |
| A_24_P679409 | SRRM1   | 0.0154 | -1.60 |
| A_24_P159916 | SSBP4   | 0.0442 | 1.53  |
| A_23_P150147 | SSH3    | 0.0095 | 1.60  |
| A_32_P50431  | ST13    | 0.0104 | -1.81 |
| A_24_P268123 | ST3GAL3 | 0.0135 | -2.07 |
| A_23_P33856  | STAG2   | 0.0487 | -1.74 |
| A_23_P327519 | STARD4  | 0.0375 | -1.87 |
| A_23_P158880 | STARD5  | 0.0222 | 1.52  |
| A_23_P309837 | STON2   | 0.0051 | 1.50  |
| A_24_P201171 | STXBP1  | 0.0250 | -1.85 |
| A_24_P398746 | STYX    | 0.0162 | -1.66 |
| A_23_P43164  | SULF1   | 0.0048 | -2.34 |
| A_23_P434212 | SULT1A1 | 0.0303 | 1.53  |

|              |            |        |       |
|--------------|------------|--------|-------|
| A_24_P262201 | SULT1A4    | 0.0317 | 1.62  |
| A_23_P107981 | SULT2B1    | 0.0138 | 1.84  |
| A_23_P78808  | SYMPK      | 0.0196 | 1.54  |
| A_23_P46390  | SYTL1      | 0.0349 | 1.54  |
| A_23_P91081  | TACSTD1    | 0.0012 | 1.55  |
| A_23_P74663  | TAF1A      | 0.0485 | -1.51 |
| A_24_P376441 | TAF5L      | 0.0254 | -2.46 |
| A_23_P325887 | TBC1D8B    | 0.0146 | -2.56 |
| A_23_P114172 | TBC1D8B    | 0.0168 | -1.62 |
| A_23_P142872 | TCF7L1     | 0.0005 | 1.69  |
| A_32_P208350 | TDRD9      | 0.0023 | -3.51 |
| A_24_P483083 | TFDP1      | 0.0258 | -1.82 |
| A_23_P17095  | TFPI       | 0.0000 | -5.68 |
| A_23_P393620 | TFPI2      | 0.0084 | -3.14 |
| A_23_P62021  | THBS2      | 0.0061 | -1.54 |
| A_32_P52119  | THC2250585 | 0.0135 | 1.55  |
| A_24_P921402 | THC2263973 | 0.0479 | 1.95  |
| A_32_P171921 | THC2265989 | 0.0331 | 1.52  |
| A_24_P592591 | THC2270231 | 0.0202 | -1.88 |
| A_24_P863124 | THC2276723 | 0.0436 | -1.98 |
| A_32_P24939  | THC2278570 | 0.0004 | -4.23 |
| A_32_P3932   | THC2280799 | 0.0359 | 1.67  |
| A_24_P649735 | THC2281176 | 0.0138 | 1.73  |
| A_24_P367421 | THC2283170 | 0.0405 | -2.31 |
| A_32_P117730 | THC2283727 | 0.0454 | 1.64  |
| A_32_P212294 | THC2283810 | 0.0425 | -1.77 |
| A_32_P65843  | THC2289112 | 0.0481 | 1.50  |
| A_24_P494807 | THC2294587 | 0.0385 | -1.80 |
| A_32_P231143 | THC2296760 | 0.0488 | 2.35  |
| A_24_P703462 | THC2308747 | 0.0016 | -1.56 |
| A_32_P84707  | THC2308802 | 0.0235 | 3.03  |
| A_32_P125820 | THC2314239 | 0.0471 | 1.51  |
| A_32_P139551 | THC2316649 | 0.0119 | 2.39  |
| A_24_P795106 | THC2317099 | 0.0445 | 1.89  |
| A_32_P34970  | THC2317139 | 0.0049 | -1.74 |
| A_32_P137408 | THC2317808 | 0.0267 | -2.14 |
| A_24_P564396 | THC2335868 | 0.0000 | -1.84 |
| A_24_P707530 | THC2336549 | 0.0433 | -1.89 |
| A_32_P224586 | THC2342537 | 0.0219 | 2.77  |
| A_32_P148380 | THC2343919 | 0.0454 | -1.62 |
| A_32_P167176 | THC2343936 | 0.0326 | 2.58  |
| A_32_P177477 | THC2344152 | 0.0295 | 2.12  |

|              |            |        |       |
|--------------|------------|--------|-------|
| A_32_P167883 | THC2344420 | 0.0153 | 2.20  |
| A_32_P190682 | THC2347318 | 0.0464 | 2.17  |
| A_32_P118481 | THC2357608 | 0.0060 | -2.11 |
| A_32_P213002 | THC2364440 | 0.0359 | 1.71  |
| A_24_P455579 | THC2365025 | 0.0152 | 2.02  |
| A_32_P221517 | THC2365212 | 0.0001 | 1.78  |
| A_23_P82488  | THC2372503 | 0.0419 | -1.68 |
| A_32_P82671  | THC2373077 | 0.0020 | -1.88 |
| A_32_P2050   | THC2373975 | 0.0373 | 1.58  |
| A_32_P217901 | THC2375512 | 0.0065 | -2.46 |
| A_23_P165541 | THC2376224 | 0.0006 | -1.67 |
| A_32_P5168   | THC2377418 | 0.0474 | -1.86 |
| A_23_P57393  | THC2377764 | 0.0104 | 1.99  |
| A_23_P149938 | THC2378635 | 0.0109 | 1.76  |
| A_32_P74932  | THC2379429 | 0.0356 | 3.12  |
| A_32_P42976  | THC2381319 | 0.0174 | 2.14  |
| A_32_P203408 | THC2391898 | 0.0045 | -2.36 |
| A_32_P233834 | THC2392085 | 0.0404 | 1.89  |
| A_32_P12820  | THC2400533 | 0.0037 | -1.96 |
| A_32_P74477  | THC2403217 | 0.0318 | 1.73  |
| A_32_P146844 | THC2406576 | 0.0331 | 2.59  |
| A_32_P121755 | THC2406579 | 0.0173 | 1.54  |
| A_32_P13337  | THC2408277 | 0.0074 | 1.88  |
| A_23_P218569 | THC2411515 | 0.0135 | -1.81 |
| A_32_P112712 | THC2420676 | 0.0076 | -1.73 |
| A_32_P142334 | THC2434948 | 0.0450 | 2.20  |
| A_32_P158181 | THC2437757 | 0.0033 | 2.60  |
| A_32_P174572 | THC2438039 | 0.0101 | -1.57 |
| A_32_P220523 | THC2439328 | 0.0280 | 2.25  |
| A_32_P138437 | THC2440634 | 0.0210 | 2.30  |
| A_32_P111394 | THC2441040 | 0.0084 | 2.10  |
| A_32_P188193 | THC2445517 | 0.0064 | 3.98  |
| A_32_P184417 | THC2447037 | 0.0146 | -1.87 |
| A_32_P136450 | THC2449500 | 0.0168 | -1.53 |
| A_24_P417474 | TIA1       | 0.0133 | -1.56 |
| A_23_P167444 | TINP1      | 0.0004 | -1.58 |
| A_24_P238333 | TINP1      | 0.0010 | -1.51 |
| A_23_P372946 | TM4SF19    | 0.0312 | -1.79 |
| A_24_P305933 | TMCC3      | 0.0209 | -1.54 |
| A_23_P158277 | TMCO4      | 0.0367 | 1.73  |
| A_24_P274987 | TMEFF1     | 0.0205 | -1.70 |
| A_24_P255082 | TMEM110    | 0.0181 | -1.97 |



|              |           |        |       |
|--------------|-----------|--------|-------|
| A_23_P202964 | TMEM123   | 0.0170 | -1.61 |
| A_24_P171058 | TMEM64    | 0.0220 | -2.00 |
| A_23_P57089  | TMEPAI    | 0.0436 | 1.58  |
| A_23_P435477 | TMPRSS13  | 0.0035 | 3.24  |
| A_23_P203150 | TMPRSS13  | 0.0048 | 4.73  |
| A_23_P127608 | TMPRSS4   | 0.0065 | 1.59  |
| A_23_P47735  | TNFRSF19L | 0.0072 | -1.51 |
| A_24_P350576 | TNIK      | 0.0031 | -2.12 |
| A_23_P141180 | TOM1L2    | 0.0478 | 1.52  |
| A_24_P67364  | TPM3      | 0.0241 | -2.72 |
| A_24_P161244 | TPM3      | 0.0270 | -2.18 |
| A_24_P257224 | TPO       | 0.0330 | -2.81 |
| A_24_P323997 | TPRX1     | 0.0136 | -1.67 |
| A_32_P141135 | TRAF3IP3  | 0.0135 | 2.57  |
| A_23_P19333  | TREM1     | 0.0240 | -2.60 |
| A_23_P7932   | TREML2    | 0.0253 | -1.61 |
| A_24_P337062 | TSC22D2   | 0.0382 | -1.68 |
| A_23_P121987 | TSLP      | 0.0403 | 1.67  |
| A_23_P29248  | TST       | 0.0156 | 1.74  |
| A_23_P230    | TTC4      | 0.0486 | -1.51 |
| A_24_P359838 | TTL       | 0.0000 | -1.51 |
| A_23_P500892 | TUB       | 0.0119 | 2.08  |
| A_24_P211064 | TWSG1     | 0.0183 | -2.13 |
| A_23_P27256  | TWSG1     | 0.0209 | -1.96 |
| A_23_P204581 | TXNRD1    | 0.0236 | -2.01 |
| A_23_P6307   | U2AF1     | 0.0467 | 1.52  |
| A_23_P21207  | UBE1L     | 0.0055 | 2.11  |
| A_32_P155506 | UBE2E2    | 0.0080 | -1.93 |
| A_24_P412617 | UBE2Q2    | 0.0177 | -1.71 |
| A_23_P77274  | UBE2Q2    | 0.0213 | -1.56 |
| A_24_P329597 | UBQLN1    | 0.0086 | -2.67 |
| A_24_P102203 | UBR1      | 0.0292 | -1.55 |
| A_23_P132956 | UCHL1     | 0.0014 | -2.34 |
| A_23_P60599  | UGT1A6    | 0.0402 | 2.14  |
| A_32_P914221 | USH1G     | 0.0130 | 1.76  |
| A_32_P26330  | USP10     | 0.0156 | -1.57 |
| A_32_P132206 | USP18     | 0.0034 | 1.87  |
| A_23_P132159 | USP18     | 0.0036 | 1.85  |
| A_23_P207666 | USP6      | 0.0250 | -1.51 |
| A_23_P129695 | VASN      | 0.0336 | 1.65  |
| A_23_P201551 | VAV3      | 0.0090 | 1.75  |
| A_23_P256223 | VBP1      | 0.0164 | -1.88 |

|              |            |        |       |
|--------------|------------|--------|-------|
| A_23_P253123 | VGLL1      | 0.0009 | 9.34  |
| A_23_P161190 | VIM        | 0.0423 | -2.19 |
| A_23_P130285 | VPS53      | 0.0316 | -1.61 |
| A_23_P86089  | VWA1       | 0.0231 | 1.54  |
| A_23_P205255 | WDR20      | 0.0427 | -1.51 |
| A_24_P248167 | WDR21A     | 0.0059 | 1.60  |
| A_23_P11787  | WNT4       | 0.0121 | 5.10  |
| A_23_P382607 | WNT4       | 0.0433 | 2.22  |
| A_23_P4353   | WSB1       | 0.0288 | 1.62  |
| A_23_P81392  | WWC1       | 0.0273 | 1.61  |
| A_32_P6868   | WWTR1      | 0.0283 | -2.05 |
| A_24_P336417 | XPR1       | 0.0042 | -1.78 |
| A_23_P139825 | YAF2       | 0.0456 | -1.68 |
| A_24_P48403  | YES1       | 0.0114 | -1.77 |
| A_23_P164507 | YES1       | 0.0289 | -2.81 |
| A_24_P501544 | YPEL2      | 0.0385 | -2.00 |
| A_32_P226149 | YWHAZ      | 0.0018 | -1.69 |
| A_24_P209571 | YWHAZ      | 0.0039 | -1.61 |
| A_23_P330448 | ZADH2      | 0.0399 | -1.54 |
| A_23_P93032  | ZBED3      | 0.0043 | 2.81  |
| A_24_P76995  | ZDHHC17    | 0.0429 | -1.60 |
| A_32_P226205 | ZFHX2      | 0.0234 | 2.47  |
| A_23_P388867 | ZNF141     | 0.0037 | -1.63 |
| A_24_P402836 | ZNF141     | 0.0135 | -1.59 |
| A_23_P404064 | ZNF161     | 0.0376 | -1.52 |
| A_23_P66260  | ZNF267     | 0.0142 | -1.52 |
| A_23_P258124 | ZNF346     | 0.0115 | 1.71  |
| A_23_P434430 | ZNF439     | 0.0181 | -2.00 |
| A_23_P23966  | ZNF488     | 0.0280 | 1.81  |
| A_24_P185487 | ZNF507     | 0.0421 | -1.69 |
| A_32_P187663 | ZNF596     | 0.0053 | -1.74 |
| A_23_P355993 | ZNF614     | 0.0420 | -1.65 |
| A_23_P5405   | ZNF650     | 0.0040 | -1.85 |
| A_24_P285501 | ZNF650     | 0.0133 | -1.64 |
| A_24_P71700  | ZNF651     | 0.0339 | 1.53  |
| A_24_P118862 | ZNF678     | 0.0398 | -1.51 |
| A_32_P163458 | tcag7.1017 | 0.0299 | 1.55  |
