# Supplementary material for: Genome-Wide Small RNA Sequencing and Gene Expression Analysis Reveals a microRNA Profile of Cancer Susceptibility in ATM-Deficient Human Mammary Epithelial Cells
Source: PubMed Central journal article supplement (PMC3669333; doi:10.1371/journal.pone.0064779), 2013-05-31
Supplement: pone.0064779.s005.pdf [file pone.0064779.s005.pdf]

| <b>miRNA ID</b> | <b>Change in expression level after loss of ATM</b> | <b>Gene Symbol</b>                                                                                                                                                                                                                                                                                                                        | <b>Change in expression level after loss of ATM</b> |
|-----------------|-----------------------------------------------------|-------------------------------------------------------------------------------------------------------------------------------------------------------------------------------------------------------------------------------------------------------------------------------------------------------------------------------------------|-----------------------------------------------------|
| hsa-miR-106a    | Up                                                  | ABHD2, AHRR, B4GALT6, BAMBI, BMP2, C10orf46, CCNG2, CEP170, CNOT6L, CRIM1, DCBLD2, DPYSL2, EFNB2, FAM3C, FNDC3A, FRMD6, GDA, GPD2, HMGA2, KATNAL1, MASTL, MAT2B, MBD5, MBTPS1, MCL1, NAA30, OTUD4, PCDHA11, PLDN, PPP2CA, PPP3R1, RAB22A, RPS6KA2, SEMA4B, SLC30A7, SNX9, STYX, SULF1, TMEM123, TMEM64, TSC22D2, USP6, YES1, YPEL2        | Down                                                |
| hsa-miR-107     | Up                                                  | ABHD2, ACTR2, BACH2, CAPZA2, CDC27, CHD2, CNOT6L, DCBLD2, EFNB2, EIF2C4, EXOC5, G3BP2, GK, GNAI3, KIAA1804, MCFD2, MTMR4, OTUD4, PPP3R1, PRMT8, RAB10, RAI14, SNRK, ST13, YAF2                                                                                                                                                            | Down                                                |
| hsa-miR-10b     | Up                                                  | BACH2, ELAVL2, GATA6, MAP4K4, SMAD2                                                                                                                                                                                                                                                                                                       | Down                                                |
| hsa-miR-1201    | Up                                                  | CNOT6L, PLDN, SEMA4B, SRF                                                                                                                                                                                                                                                                                                                 | Down                                                |
| hsa-miR-130a    | Down                                                | AGPAT3, CALB1, FBXO9, MAF, N4BP1, NAV2, NDRG2, SMOC1, TOM1L2                                                                                                                                                                                                                                                                              | Up                                                  |
| hsa-miR-135b    | Down                                                | ABAT, FRMD4A, MEGF6                                                                                                                                                                                                                                                                                                                       | Up                                                  |
| hsa-miR-141     | Down                                                | FRMD4A, LOC162073, MAF, SCD5                                                                                                                                                                                                                                                                                                              | Up                                                  |
| hsa-miR-148a/b  | Up                                                  | ARFIP1, BACH2, CPD, EFNB2, EIF2C4, EIF4E3, ELAVL2, FBXO11, FMR1, HMGA2, ITGA5, KIAA0256, KIAA1324L, MAP1B, March3, MDFIC, MTMR6, MTMR9, NRP1, OTUD4, PIGA, PRKAG2, PTGES3, QKI, RA, 14, RBM9, ROCK1, SMAD2, SNRK, SULF1, USP6, WDR20                                                                                                      | Down                                                |
| hsa-miR-152     | Up                                                  | ARFIP1, BACH2, CPD, EFNB2, EIF2C4, EIF4E3, ELAVL2, FBXO11, FMR1, HMGA2, ITGA5, KIAA0256, KIAA1324L, MAP1B, March3, MDFIC, MTMR6, MTMR9, NRP1, OTUD4, PIGA, PRKAG2, PTGES3, QKI, RAB14, RBM9, ROCK1, SMAD2, SNRK, SULF1, USP6, WDR20                                                                                                       | Down                                                |
| hsa-miR-183     | Up                                                  | BACH2, BMI1, BZW1, CHD2, CNOT6L, CYR1, FGF9, FRMD6, GPAM, ICK, MTMR6, MYO1B, NUDT4, OSBPL8, PPP2CA, YAF2                                                                                                                                                                                                                                  | Down                                                |
| hsa-miR-192     | Up                                                  | PABPC4, PRKAR1A                                                                                                                                                                                                                                                                                                                           | Down                                                |
| hsa-miR-19a     | Down                                                | ENC1, MICAL3, MYLIP, NBEAL2, PITX1, SLC37A1, SMOC1, TUB                                                                                                                                                                                                                                                                                   | Up                                                  |
| hsa-miR-200a    | Down                                                | FRMD4A, MAF, SCD5                                                                                                                                                                                                                                                                                                                         | Up                                                  |
| hsa-miR-200b    | Up                                                  | AP1S2, BACH2, BMI1, C10orf46, C3orf23, C6orf167, CHD2, COPS8, DCBLD2, DDEF1, EFNB2, ELAVL2, EPS8, ETV5, FRMD6, GNAI3, HS2ST1, ICK, KATNAL1, KIAA0256, MAP4K4, MCFD2, NUDT4, OTUD4, PCTK2, PPP2CA, PPP2R2C, PRKAR1A, RAP1B, RBM9, RPS6KA2, SMAD2, SPAST, SRF, SULF1, TSC22D2, YPEL2                                                        | Down                                                |
| hsa-miR-200c    | Up                                                  | AP1AR, AP1S2, ASAP1, B4GALT6, BACH2, BMI1, C10orf46, C3orf23, CDK17, CHD2, CNOT6L, COPS8, DCBLD2, EFNB2, ELAVL2, EPS8, ETV5, FRMD6, GATA6, GNAI3, HS2ST1, ICK, KATNAL1, MAP4K4, MCFD2, MMS22L, MTMR6, MTMR9, NUDT4, OTUD4, PLDN, PPP2CA, PPP2R2C, PRKAR1A, QKI, RAP1B, RBFOX2, RPS6KA2, SMAD2, SPAST, SRF, SULF1, TMEM123, TSC22D2, YPEL2 | Down                                                |
| hsa-miR-215     | Up                                                  | PABPC4                                                                                                                                                                                                                                                                                                                                    |                                                     |
| hsa-miR-221     | Up                                                  | BMI1, FMR1, FNDC3A, GNAI3, NFYB, PCDHA11, PPP3R1, RAB22A, SOCS1, STYX                                                                                                                                                                                                                                                                     | Down                                                |
| hsa-miR-29c     | Down                                                | BLMH, CBX6, COL5A3, FRMD4A, FZD5, IFI30, MEGF6, NAV2, PTRF, ZNF346                                                                                                                                                                                                                                                                        | Up                                                  |

|               |      |                                                                                                                                                                                                                                                                                                                                                                     |      |
|---------------|------|---------------------------------------------------------------------------------------------------------------------------------------------------------------------------------------------------------------------------------------------------------------------------------------------------------------------------------------------------------------------|------|
| hsa-miR-30a/d | Up   | ABHD2, B4GALT6, BACH2, C9orf72, CAMK4, CEACAM1, CEP170, CYR1, DPYSL2, ELAVL2, EPDR1, FAM83F, FNDC3A, GDA, GJA1, ICK, ITGA5, KIAA1804, LARP4, LIFR, LIN7C, MAP4K4, MYH10, NFYB, OTUD4, PIGA, PPP3R1, PRKAR1A, QKI, RAB22A, RAI14, RAP1B, RFFL, RPS6KA2, RUNX2, SMAD2, SNIP1, SOCS1, SPAST, STAG2, STXBP1, TFDPI, THBS2, TIA1, TMEFF1, XPR1, YAF2, YES1, YPEL2, YWHAZ | Down |
| hsa-miR-31    | Down | CEBPA, DGCR8, PDAP1, SALL2, VAV3                                                                                                                                                                                                                                                                                                                                    | Up   |
| hsa-miR-335   | Up   | ACTR2, CRIM1, FMR1, MAT2B, MTMR9, NFYB, RBFOX2, SNIP1                                                                                                                                                                                                                                                                                                               | Down |
| hsa-miR-33a/b | Down | ENC1, GALNT10                                                                                                                                                                                                                                                                                                                                                       |      |
| hsa-miR-345   | Down | SORT1                                                                                                                                                                                                                                                                                                                                                               | Up   |
| hsa-miR-374a  | Down | ACTR2, ADAM10, ANTXR2, BACH2, BMP2, C3orf23, CAPZA2, CDA, CDK17, CRIM1, CTAGE5, CYR1, EPDR1, EXOC5, FGF5, FNDC3A, GK, ICK, LIFR, LIN7C, MCFD2, MME, MTMR9, NFYB, OSBPL8, PCDHA11, PLDN, PPP2CA, PPP2R2C, RAB10, RAB22A, SMAD2, STYX, TFDPI, TMEM123, WDR20, YAF2, YPEL2                                                                                             | Up   |
| hsa-miR-379   | Up   | CAPZA2, KATNAL1                                                                                                                                                                                                                                                                                                                                                     | Down |
| hsa-miR-424   | Down | AGPAT3, GYLTL1B, KIF5A, N4BP1, OSCP1, PDAP1, SEMA3D, SORT1, WNT4, WSB1                                                                                                                                                                                                                                                                                              | Up   |
| hsa-miR-425   | Down | CBX6, KIAA0889, SLC37A1                                                                                                                                                                                                                                                                                                                                             | Up   |
| hsa-miR-452   | Up   | B4GALT6, CHD2, CNOT6L, ELAVL2, EPS8, FNDC3A, KIAA1804, LIFR, MTMR6, RAB14, SMAD2, SNRK                                                                                                                                                                                                                                                                              | Down |
| hsa-miR-548e  | Up   | B4GALT6, BZW1, CPD, EIF2C4, ELAVL2, EXOC5, FAM3C, FGF5, FMR1, FNDC3A, G3BP2, GDA, GJA1, GPAM, KRIT1, LIN7C, MSRB3, NIPA2, OSBPL8, PPP3R1, QKI, RAB10, RAB22A, STAG2, TMEM64, TXNRD1, YAF2, YES1                                                                                                                                                                     | Down |
| hsa-miR-598   | Up   | MSRB3                                                                                                                                                                                                                                                                                                                                                               | Down |
| hsa-miR-625   | Down | CBX6                                                                                                                                                                                                                                                                                                                                                                |      |
| hsa-miR-651   | Up   | GDA, RAP1B, SLMAP, SPAST, STXBP1                                                                                                                                                                                                                                                                                                                                    | Down |
| hsa-miR-708   | Down | AGPAT3, DNAJA4, LYPD3, N4BP1, RGS16                                                                                                                                                                                                                                                                                                                                 | Up   |
| hsa-miR-93    | Up   | ABHD2, AHRR, AHRR, B4GALT6, BAMBI, BMP2, C10orf46, CCNG2, CEP170, CNOT6L, CRIM1, DCBLD2, DPYSL2, EFNB2, FAM3C, FNDC3A, FRMD6, GDA, GPD2, HMGA2, MASTL, MAT2B, MBD5, MBTPS1, MCL1, NAT12, OTUD4, PCDHA11, PPP2CA, PPP3R1, RAB22A, RPS6KA5, SEMA4B, SLC30A7, SNX9, STYX, SULF1, TMEM123, TMEM64, TSC22D2, USP6, YES1, YPEL2                                           |      |
| hsa-miR-944   | Up   | ACTR2, AHRR, DCBLD2, DPYSL2, EXOC5, FAM3C, GATA6, GK, GPAM, LIN7C, MDFIC, MMS22L, MTMR6, OSBPL8, PLDN, PPP2CA, PRKAG2, PRKAR1A, QKI, RAB22A, RUNX2, SLMAP, SMAD2, SPAST, STYX, TMEM64, TSC22D2, UBR1, YAF2, YPEL2                                                                                                                                                   | Down |
| hsa-miR-96    | Down | ABAT, CBX6, CELSR2, FRMD4A, MAF, N4BP1, PODXL, SORT1                                                                                                                                                                                                                                                                                                                | Up   |
| hsa-miR-99b   | Up   | AP1AR, EPDR1, HS3ST2                                                                                                                                                                                                                                                                                                                                                | Down |
