# Supplementary material for: Genome-Wide Small RNA Sequencing and Gene Expression Analysis Reveals a microRNA Profile of Cancer Susceptibility in ATM-Deficient Human Mammary Epithelial Cells
Source: PubMed Central journal article supplement (PMC3669333; doi:10.1371/journal.pone.0064779), 2013-05-31
Supplement: pone.0064779.s006.pdf [file pone.0064779.s006.pdf]

## **Transcription Factors**

CEBPA

CSRP1

ELF3

EYA2

GATA6

ID2

ID3

MAF

NCOA4

NR4A3

POU5F1

RRN3

SALL2

TAF1A

TCF7L1

TUB

VGLL1

YAF2

ZNF141

ZNF267
