# Supplementary material for: Genome-Wide Small RNA Sequencing and Gene Expression Analysis Reveals a microRNA Profile of Cancer Susceptibility in ATM-Deficient Human Mammary Epithelial Cells
Source: PubMed Central journal article supplement (PMC3669333; doi:10.1371/journal.pone.0064779), 2013-05-31
Supplement: pone.0064779.s007.pdf [file pone.0064779.s007.pdf]

### Selected Genes Implicated in Cancer

ABAT  
ADAM10  
ANTXR2  
BAMBI  
BZW1  
CAPZA2  
CDA  
CDC27  
DGCR8  
DPYSL2  
EFNB2  
ENC1  
EPS8  
ETV5  
GATA6  
GJA1  
HMGA2  
HS3ST2  
IFI30  
LIFR  
LIN7C  
MAF  
MAP4K4  
MCL1  
MME  
MTMR6  
NRP1  
PPP2CA  
RUNX2  
SMAD2  
SOCS1  
SORT1  
SULF1  
VAV3  
VIM  
YES1  
YWHAZ

### Selected Genes Implicated in Cell Cycle

BMI1  
BMP2  
CACUL1  
CCNG2  
CDC27  
CEBPA  
FGF9  
GATA6  
GJA1  
GNA13  
HMGA2  
ITGA5  
MASTL  
NRP1  
PRKAR1A  
PTGES3  
RFFL  
RUNX2  
SMAD2  
SOCS1  
SULF1  
TFDP1  
VAV3  
WNT4  
ZNF346

## **Selected Genes Implicated in DNA Replication, Recombination and Repair**

BMP2

CEBPA

CEBPA

FGF9

GJA1

GNAI3

ITGA5

MAF

MCL1

RAP1B

RUNX2

SALL2

THBS2

VIM
